# Supplementary material for: Iron nitrate and 4-OH-TEMPO-cocatalyzed aerobic oxidation of isochromans
Source: Royal Society of Chemistry journal article supplement (doi:10.1039/d2qo01800d), 2023-01-01

# Iron Nitrate and 4-OH-TEMPO-Cocatalyzed Aerobic Oxidation of Isochromans

Qian Zhang,<sup>a</sup> Jiabin Zhang,<sup>b</sup> Hui Qian,<sup>\*a</sup> and Shengming Ma<sup>\*a,b,c</sup>

<sup>a</sup> Research Center for Molecular Recognition and Synthesis, Department of Chemistry, Fudan University, 220 Handan Lu, Shanghai 200433, China.

<sup>b</sup> Laboratory of Molecular Recognition and Synthesis, Department of Chemistry, Zhejiang University, Hangzhou 310027, Zhejiang Province, China.

<sup>c</sup> State Key Laboratory of Organometallic Chemistry, Shanghai Institute of Organic Chemistry, Chinese Academy of Sciences, 345 Lingling Lu, Shanghai 200032, China.

E-mail: [masm@sioc.ac.cn](mailto:masm@sioc.ac.cn). Homepage: <https://masm.fudan.edu.cn>

## Supporting information

|                                          |         |
|------------------------------------------|---------|
| General information                      | S2      |
| Experimental details and analytical data | S2-S14  |
| Mechanistic studies                      | S15-S20 |
| References                               | S21-S22 |
| NMR and HPLC spectra of the products     | S23-S72 |

**General Information.** NMR spectra were taken with an Agilent-400 spectrometer (400 MHz for  $^1\text{H}$  NMR, 100 MHz for  $^{13}\text{C}$  NMR, and 376 MHz for  $^{19}\text{F}$  NMR). Flue gas analysis experiments were performed with a Testo 350 flue gas analyzer. All reactions were carried out in 25 mL flasks unless otherwise mentioned.  $\text{Fe}(\text{NO}_3)_3 \cdot 9\text{H}_2\text{O}$  (98% purity) was purchased from Sinopharm Chemical Reagent Co., Ltd.; 4-OH-TEMPO (98% purity) was purchased from Shanghai Darui Fine Chemical Co., Ltd.; MeCN was purchased from Sinopharm Chemical Reagent Co., Ltd. and used directly without further treatment. Isochroman **1a** was purchased from Shanghai Titan Technology Co., Ltd.; **1g** and **1q** were purchased from Bide Pharmatech Ltd.; **1r** was purchased from Tokyo Chemical Industry Co., Ltd.. NMR yields and recoveries were determined by  $^1\text{H}$  NMR analysis using dibromomethane as the internal standard. Room temperature is referred to the temperature around 25 °C.

## Experimental details and analytical data

### 1. Preparation of isochromans

Isochromans **1b-1f** and **1h-1o** were prepared following the literature methods.<sup>1-3</sup>

#### (1) Preparation of 7-phenylisochromane **1p** (zhangq-5-026, zhangq-5-028)

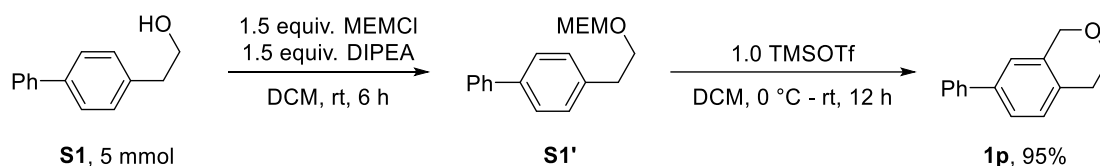

**Typical Procedure I:** To a 100 mL flask was added 2-(4-phenylphenyl)ethan-1-ol **S1** (0.9914 g, 5 mmol). Then the flask was degassed and refilled with argon for three times. After the addition of anhydrous DCM (15 mL), (2-methoxyethoxy)methyl chloride (MEMCl) (0.9 mL,  $d = 1.091 \text{ g/mL}$ , 0.9819 g, 7.6 mmol, 97% purity) and *N,N*-diisopropylethylamine (DIPEA) (1.3 mL,  $d = 0.742 \text{ g/mL}$ , 0.9646 g, 7.5 mmol) were added sequentially. The resulting mixture was stirred for 6 h at room temperature until the completion of the reaction as monitored by TLC. The crude reaction mixture was washed with  $\text{H}_2\text{O}$  (30 mL) and dried over  $\text{Na}_2\text{SO}_4$ . After filtration and concentration,

the crude product **S1'** was submitted to the next step without further purification.

The crude product **S1'** was added to a 100 mL flask, which was then degassed and refilled with argon for three times. After the addition of anhydrous DCM (15 mL), the resulting mixture was cooled to 0 °C with an ice-water bath, and trimethylsilyl trifluoromethanesulfonate (TMSOTf, 0.9 mL, d = 1.228 g/mL, 1.1052 g, 5 mmol) was added dropwise. The resulting mixture was stirred for 12 h at room temperature, quenched with a saturated aqueous solution of NaHCO<sub>3</sub> (aq., 15 mL), and transferred to a separatory funnel. The organic phase was separated, washed with brine, dried with anhydrous Na<sub>2</sub>SO<sub>4</sub>, filtrated, and concentrated. The residue was purified by Biotage Isorela One purification system on flash silica gel column (Santai Tech. Inc., 120 g) to afford **1p** (0.9957 g, 95%) [eluent: petroleum ether/ethyl acetate = 19/1 (~600 mL); flow rate: 100 mL/min] as a solid: m.p. 62.6-63.1 °C (petroleum ether/dichloromethane); <sup>1</sup>H NMR (400 MHz, CDCl<sub>3</sub>): δ 7.55 (d, *J* = 7.6 Hz, 2 H, ArH), 7.47-7.37 (m, 3 H, ArH), 7.33 (t, *J* = 7.4 Hz, 1 H, ArH), 7.24-7.15 (m, 2 H, ArH), 4.84 (s, 2 H, OCH<sub>2</sub>), 4.01 (t, *J* = 5.6 Hz, 2 H, OCH<sub>2</sub>), 2.90 (t, *J* = 5.4 Hz, 2 H, CH<sub>2</sub>); <sup>13</sup>C NMR (100 MHz, CDCl<sub>3</sub>): δ 140.8, 139.0, 135.2, 132.3, 129.2, 128.7, 127.1, 126.9, 125.1, 122.9, 68.0, 65.3, 28.0; MS (FI) *m/z*: 210 (M<sup>+</sup>); **Anal. Calcd.** for C<sub>15</sub>H<sub>14</sub>O: C 85.68, H 6.71; found C 85.77, H 6.81; **IR** (neat): ν = 2852, 2830, 1482, 1451, 1265, 1178, 1132, 1098, 1068, 1041, 1005 cm<sup>-1</sup>.

## (2) Preparation of (*S*)-3-methylisochromane (*S*)-**1m** (zhangq-5-077)

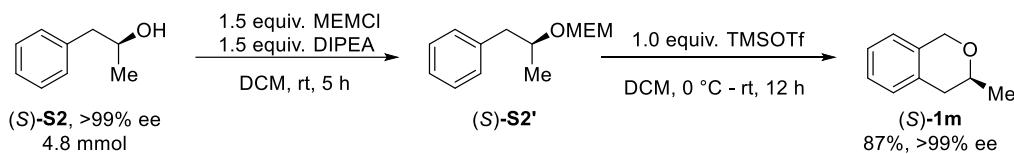

Following **Typical Procedure I**, the reaction of (*S*)-**S2**<sup>4</sup> (0.6486 g, 4.8 mmol), MEMCl (0.9 mL, d = 1.091 g/mL, 0.9819 g, 7.6 mmol, 97% purity), and DIPEA (1.3 mL, d = 0.742 g/mL, 0.9646 g, 7.5 mmol) in anhydrous DCM (14 mL) afforded the crude product (*S*)-**S2'**. The reaction of the crude product (*S*)-**S2'** and TMSOTf (0.9 mL, d = 1.228 g/mL, 1.1052 g, 5 mmol) in anhydrous DCM (14 mL) afforded (*S*)-**1m**<sup>5</sup> (0.6154 g, 87%, ee: >99%) [eluent: petroleum ether/ethyl acetate = 20/1 (~210 mL)] as

an oil: HPLC conditions: OD-H column, hexane/*i*-PrOH = 99.5/0.5, 0.5 mL/min,  $\lambda$  = 214 nm,  $t_R$ (major) = 13.4 min;  $^1\text{H NMR}$  (400 MHz,  $\text{CDCl}_3$ ):  $\delta$  7.21-7.12 (m, 2 H, ArH), 7.12-7.04 (m, 1 H, ArH), 7.04-6.95 (m, 1 H, ArH), 4.88-4.77 (m, 2 H,  $\text{CH}_2$ ), 3.88-3.75 (m, 1 H, CH), 2.71 (d,  $J$  = 6.8 Hz, 2 H,  $\text{CH}_2$ ), 1.35 (d,  $J$  = 6.0 Hz, 3 H,  $\text{CH}_3$ );  $^{13}\text{C NMR}$  (100 MHz,  $\text{CDCl}_3$ ):  $\delta$  134.6, 133.5, 128.7, 126.3, 125.9, 124.1, 70.9, 68.1, 35.8, 21.6.

## 2. Preparation of isochromanones

### (1) Preparation of isochroman-1-one **2a** (zhangq-3-149, zhangq-5-061)

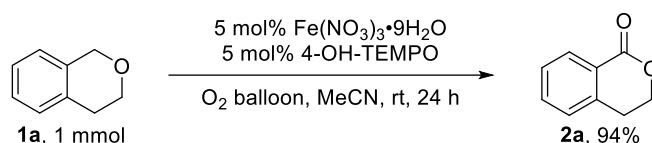

**Typical Procedure II:** To a 25 mL flask were added  $\text{Fe}(\text{NO}_3)_3 \cdot 9\text{H}_2\text{O}$  (20.4 mg, 0.05 mmol), 4-OH-TEMPO (8.7 mg, 0.05 mmol), **1a** (134.3 mg, 1.0 mmol), and MeCN (0.8 mL) sequentially. After the installation of an  $\text{O}_2$  balloon, the resulting mixture was stirred at room temperature for 24 h until the completion of the reaction as monitored by TLC (petroleum ether/ethyl acetate = 5/1). The crude reaction mixture was filtrated through a short column of silica gel eluted with ethyl acetate (3 x 20 mL). After evaporation, the residue was purified by chromatography on silica gel to afford **2a**<sup>6</sup> (139.1 mg, 94%) [eluent: petroleum ether/ethyl acetate = 8/1(~225 mL) to 5/1(~180 mL)] as an oil:  $^1\text{H NMR}$  (400 MHz,  $\text{CDCl}_3$ ):  $\delta$  8.09 (d,  $J$  = 8.0 Hz, 1 H, ArH), 7.54 (t,  $J$  = 7.6 Hz, 1 H, ArH), 7.39 (t,  $J$  = 7.6 Hz, 1 H, ArH), 7.27 (d,  $J$  = 7.6 Hz, 1 H, ArH), 4.53 (t,  $J$  = 6.0 Hz, 2 H,  $\text{CH}_2$ ), 3.06 (t,  $J$  = 6.0 Hz, 2 H,  $\text{CH}_2$ );  $^{13}\text{C NMR}$  (100 MHz,  $\text{CDCl}_3$ ):  $\delta$  164.9, 139.4, 133.4, 130.0, 127.4, 127.1, 125.0, 67.1, 27.5; **MS** (70 eV, EI)  $m/z$  (%): 148 ( $\text{M}^+$ , 55.3), 118 (100); **IR** (neat):  $\nu$  = 3002, 2946, 2898, 1716, 1606, 1459, 1392, 1292, 1241, 1119, 1027  $\text{cm}^{-1}$ .

### (2) Preparation of 7-methoxyisochroman-1-one **2b** (zhangq-6-044, zhangq-6-055, zhangq-3-186)

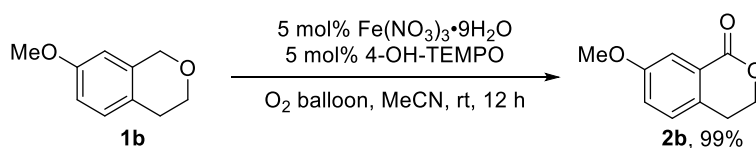

Following **Typical Procedure II**, the reaction of **1b** (163.1 mg, 1.0 mmol),

Fe(NO<sub>3</sub>)<sub>3</sub>•9H<sub>2</sub>O (21.0 mg, 0.05 mmol), and 4-OH-TEMPO (8.9 mg, 0.05 mmol) in MeCN (0.8 mL) afforded **2b**<sup>6</sup> (175.5 mg, 99%) [eluent: petroleum ether/ethyl acetate = 4/1 (~400mL)] as an oil: <sup>1</sup>H NMR (400 MHz, CDCl<sub>3</sub>): δ 7.59 (d, *J* = 2.0 Hz, 1 H, ArH), 7.17 (d, *J* = 8.4 Hz, 1 H, ArH), 7.10 (dd, *J*<sub>1</sub> = 8.4 Hz, *J*<sub>2</sub> = 2.0 Hz, 1 H, ArH), 4.52 (t, *J* = 6.0 Hz, 2 H, CH<sub>2</sub>), 3.85 (s, 3 H, CH<sub>3</sub>), 3.00 (t, *J* = 6.0 Hz, 2 H, CH<sub>2</sub>); <sup>13</sup>C NMR (100 MHz, CDCl<sub>3</sub>): δ 165.1, 159.0, 131.8, 128.4, 126.1, 121.6, 113.0, 67.6, 55.6, 27.0; MS (70 eV, EI) *m/z* (%): 178 (M<sup>+</sup>, 83.72), 120 (100); IR (neat): ν = 2962, 2898, 2837, 1714, 1613, 1499, 1428, 1320, 1281, 1086, 1027 cm<sup>-1</sup>.

Second try: following **Typical Procedure II**, the reaction of **1b** (78.0 mg, 0.5 mmol), Fe(NO<sub>3</sub>)<sub>3</sub>•9H<sub>2</sub>O (10.3 mg, 0.025 mmol), and 4-OH-TEMPO (4.5 mg, 0.025 mmol) in MeCN (0.4 mL) afforded **2b**<sup>6</sup> (83.8 mg, 99%) [eluent: petroleum ether/ethyl acetate = 5/1 (~280 mL)] as an oil.

### (3) Preparation of 6,7-dimethoxyisochroman-1-one **2c** (zhangq-4-058)

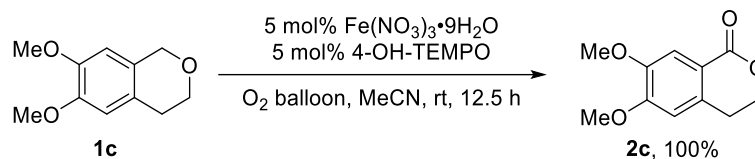

Following **Typical Procedure II**, the reaction of **1c** (194.8 mg, 1.0 mmol), Fe(NO<sub>3</sub>)<sub>3</sub>•9H<sub>2</sub>O (20.8 mg, 0.05 mmol), and 4-OH-TEMPO (8.8 mg, 0.05 mmol) in MeCN (0.8 mL) afforded **2c**<sup>7</sup> (209.4 mg, 100%) [eluent: petroleum ether/ethyl acetate = 4/1 (~600 mL)] as a solid: m.p. 139.9-140.8 °C (petroleum ether/ethyl acetate) (reported:<sup>8</sup> m.p. 140-141 °C (petroleum ether/ethyl acetate)); <sup>1</sup>H NMR (400 MHz, CDCl<sub>3</sub>): δ 7.56 (s, 1 H, ArH), 6.69 (s, 1 H, ArH), 4.52 (t, *J* = 6.0 Hz, 2 H, CH<sub>2</sub>), 3.95 (s, 3 H, CH<sub>3</sub>), 3.92 (s, 3 H, CH<sub>3</sub>), 2.99 (t, *J* = 6.2 Hz, 2 H, CH<sub>2</sub>); <sup>13</sup>C NMR (100 MHz, CDCl<sub>3</sub>): δ 165.2, 153.6, 148.5, 133.9, 117.4, 111.8, 109.1, 67.3, 56.1, 27.5; MS (70 eV, EI) *m/z* (%): 208 (M<sup>+</sup>, 100); IR (neat): ν = 2965, 2922, 1690, 1604, 1510, 1453, 1423, 1391, 1233, 1086, 1031 cm<sup>-1</sup>.

### (4) Preparation of 7-methylisochroman-1-one **2d** (zhangq-3-171)

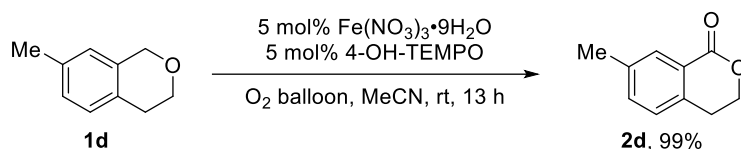

Following **Typical Procedure II**, the reaction of **1d** (146.9 mg, 1.0 mmol),  $\text{Fe}(\text{NO}_3)_3 \cdot 9\text{H}_2\text{O}$  (21.0 mg, 0.05 mmol), 4-OH-TEMPO (8.7 mg, 0.05 mmol) in MeCN (0.8 mL) afforded **2d**<sup>6</sup> (158.6 mg, 99%) [eluent: petroleum ether/ethyl acetate = 8/1 (~225 mL)] as an oil: **<sup>1</sup>H NMR** (400 MHz,  $\text{CDCl}_3$ ):  $\delta$  7.91 (s, 1 H, ArH), 7.35 (d,  $J = 8.0$  Hz, 1 H, ArH), 7.15 (d,  $J = 7.6$  Hz, 1 H, ArH), 4.52 (t,  $J = 5.6$  Hz, 2 H,  $\text{CH}_2$ ), 3.01 (t,  $J = 5.8$  Hz, 2 H,  $\text{CH}_2$ ), 2.39 (s, 3 H,  $\text{CH}_3$ ); **<sup>13</sup>C NMR** (100 MHz,  $\text{CDCl}_3$ ):  $\delta$  165.1, 137.1, 136.4, 134.3, 130.1, 126.9, 124.7, 67.2, 27.1, 20.6; **MS** (70 eV, EI)  $m/z$  (%): 162 ( $\text{M}^+$ , 90.62), 132 (100); **IR** (neat):  $\nu = 2959, 2907, 1717, 1616, 1500, 1420, 1387, 1285, 1117, 1036 \text{ cm}^{-1}$ .

#### (5) Preparation of 5-methylisochroman-1-one **2e** (zhangq-4-044)

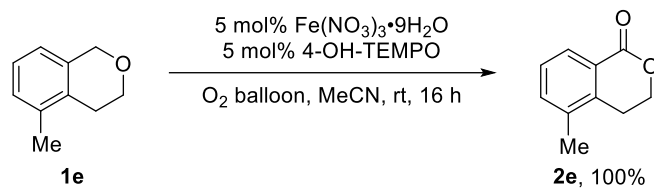

Following **Typical Procedure II**, the reaction of **1e** (148.2 mg, 1.0 mmol),  $\text{Fe}(\text{NO}_3)_3 \cdot 9\text{H}_2\text{O}$  (20.0 mg, 0.05 mmol), 4-OH-TEMPO (8.8 mg, 0.05 mmol) in MeCN (0.8 mL) afforded **2e**<sup>6</sup> (161.6 mg, 100%) [eluent: petroleum ether/ethyl acetate = 5/1 (~400 mL)] as a solid: m.p. 71.9-72.9 °C (petroleum ether/dichloromethane) (reported:<sup>9</sup> m.p. 68-70 °C); **<sup>1</sup>H NMR** (400 MHz,  $\text{CDCl}_3$ ):  $\delta$  7.98 (d,  $J = 8.0$  Hz, 1 H, ArH), 7.41 (d,  $J = 7.2$  Hz, 1 H, ArH), 7.30 (t,  $J = 7.6$  Hz, 1 H, ArH), 4.53 (t,  $J = 6.0$  Hz, 2 H,  $\text{CH}_2$ ), 2.98 (t,  $J = 6.0$  Hz, 2 H,  $\text{CH}_2$ ), 2.33 (s, 3 H,  $\text{CH}_3$ ); **<sup>13</sup>C NMR** (100 MHz,  $\text{CDCl}_3$ ):  $\delta$  165.3, 138.1, 134.9, 134.8, 127.9, 126.9, 125.1, 66.5, 24.7, 18.6; **MS** (70 eV, EI)  $m/z$  (%): 162 ( $\text{M}^+$ , 68.95), 132 (100); **IR** (neat):  $\nu = 2994, 2965, 2923, 1700, 1596, 1475, 1395, 1300, 1278, 1123, 1042 \text{ cm}^{-1}$ .

#### (6) Preparation of 6-bromoisochroman-1-one **2f** (zhangq-4-120)

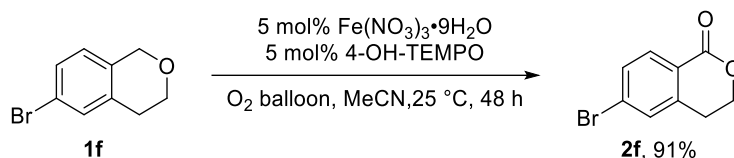

Following **Typical Procedure II**, the reaction of **1f** (213.1 mg, 1.0 mmol),  $\text{Fe(NO}_3)_3 \cdot 9\text{H}_2\text{O}$  (21.1 mg, 0.05 mmol), 4-OH-TEMPO (8.8 mg, 0.05 mmol) in MeCN (0.8 mL) afforded **2f**<sup>7</sup> (208.2 mg, 91%, purity: 99%) [eluent: petroleum ether/ethyl acetate = 5/1 (~500 mL)] as a solid: m.p. 123.4-124.1 °C (petroleum ether/dichloromethane) (reported:<sup>10</sup> m.p. 63-65 °C); **<sup>1</sup>H NMR** (400 MHz,  $\text{CDCl}_3$ ):  $\delta$  7.95 (d,  $J = 8.4$  Hz, 1 H, ArH), 7.54 (d,  $J = 8.0$  Hz, 1 H, ArH), 7.46 (s, 1 H, ArH), 4.54 (t,  $J = 6.0$  Hz, 2 H,  $\text{CH}_2$ ), 3.06 (t,  $J = 5.8$  Hz, 2 H,  $\text{CH}_2$ ); **<sup>13</sup>C NMR** (100 MHz,  $\text{CDCl}_3$ ):  $\delta$  164.2, 141.2, 131.8, 131.0, 130.2, 128.5, 124.0, 67.0, 27.4; **MS** (70 eV, EI)  $m/z$  (%): 228 ( $\text{M}^+(\text{}^{81}\text{Br})$ , 51.66), 226 ( $\text{M}^+(\text{}^{79}\text{Br})$ , 51.32), 198 (100); **IR** (neat):  $\nu = 3063, 2921, 1703, 1591, 1568, 1476, 1415, 1339, 1281, 1195, 1131, 1057, 1028 \text{ cm}^{-1}$ .

**(7) Preparation of 7-bromoisochroman-1-one 2g (zhangq-3-162, zhangq-3-174)**

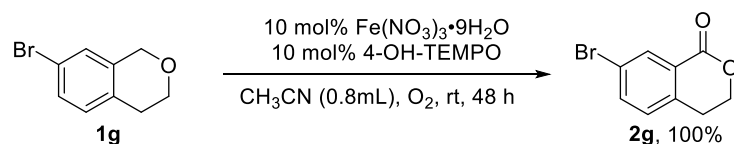

Following **Typical Procedure II**, the reaction of **1g** (214.9 mg, 1.0 mmol),  $\text{Fe(NO}_3)_3 \cdot 9\text{H}_2\text{O}$  (40.8 mg, 0.1 mmol), 4-OH-TEMPO (17.7 mg, 0.1 mmol) in MeCN (0.8 mL) afforded **2g**<sup>7</sup> (221.3 mg, 100%) [eluent: petroleum ether/ethyl acetate = 8/1 (~225 mL) to 5/1 (~240 mL)] as a solid: m.p. 96.6-97.2 °C (petroleum ether/ethyl ether) (reported:<sup>11</sup> m.p. 79-81.5 °C (ethyl ether)); **<sup>1</sup>H NMR** (400 MHz,  $\text{CDCl}_3$ ):  $\delta$  8.23 (s, 1 H, ArH), 7.66 (d,  $J = 8.0$  Hz, 1 H, ArH), 7.17 (d,  $J = 8.0$  Hz, 1 H, ArH), 4.54 (t,  $J = 6.0$  Hz, 2 H,  $\text{CH}_2$ ), 3.03 (t,  $J = 6.0$  Hz, 2 H,  $\text{CH}_2$ ); **<sup>13</sup>C NMR** (100 MHz,  $\text{CDCl}_3$ ):  $\delta$  163.7, 138.2, 136.5, 133.1, 128.9, 127.0, 121.3, 67.2, 27.3; **MS** (70 eV, EI)  $m/z$  (%): 228 ( $\text{M}^+(\text{}^{81}\text{Br})$ , 61.84), 226 ( $\text{M}^+(\text{}^{79}\text{Br})$ , 61.83), 196 (100); **IR** (neat):  $\nu = 2951, 2925, 1710, 1595, 1478, 1422, 1328, 1293, 1193, 1068 \text{ cm}^{-1}$ .

**(8) Preparation of 7-chloroisochroman-1-one 2h (zhangq-4-121, zhangq-4-127)**

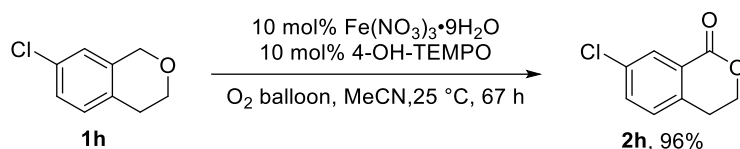

Following **Typical Procedure II**, the reaction of **1h** (168.9 mg, 1.0 mmol),  $\text{Fe}(\text{NO}_3)_3 \cdot 9\text{H}_2\text{O}$  (41.6 mg, 0.1 mmol), 4-OH-TEMPO (17.6 mg, 0.1 mmol) in MeCN (0.8 mL) afforded **2h**<sup>7</sup> (174.7 mg, 96%) [eluent: petroleum ether/ethyl acetate = 10/1 (~220 mL) to 5/1 (~360 mL)] as a solid: m.p. 72.6-73.0 °C (petroleum ether/dichloromethane) (reported:<sup>12</sup> m.p. 73-74 °C); **<sup>1</sup>H NMR** (400 MHz,  $\text{CDCl}_3$ ):  $\delta$  8.08 (d,  $J = 2.4$  Hz, 1 H, ArH), 7.51 (dd,  $J_1 = 8.0$  Hz,  $J_2 = 2.4$  Hz, 1 H, ArH), 7.23 (d,  $J = 8.4$  Hz, 1 H, ArH), 4.54 (t,  $J = 6.0$  Hz, 2 H,  $\text{CH}_2$ ), 3.05 (t,  $J = 6.0$  Hz, 2 H,  $\text{CH}_2$ ); **<sup>13</sup>C NMR** (100 MHz,  $\text{CDCl}_3$ ):  $\delta$  163.7, 137.7, 133.7, 130.1, 128.7, 126.7, 67.2, 27.2; **MS** (70 eV, EI)  $m/z$  (%): 184 ( $\text{M}^+(\text{^{37}Cl})$ , 18.87), 182 ( $\text{M}^+(\text{^{35}Cl})$ , 63.48), 152 (100); **IR** (neat):  $\nu = 3077, 2974, 2924, 1711, 1677, 1600, 1478, 1425, 1351, 1296, 1237, 1137, 1083, 1030 \text{ cm}^{-1}$ .

**(9) Preparation of 7-fluoroisochroman-1-one 2i (zhangq-4-128, zhangq-4-132)**

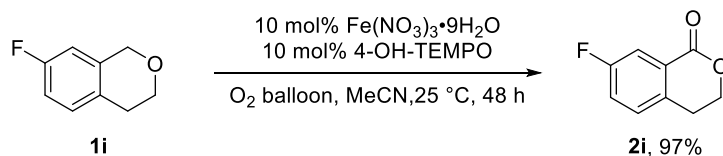

Following **Typical Procedure II**, the reaction of **1i** (151.5 mg, 1.0 mmol),  $\text{Fe}(\text{NO}_3)_3 \cdot 9\text{H}_2\text{O}$  (41.1 mg, 0.1 mmol), 4-OH-TEMPO (17.6 mg, 0.1 mmol) in MeCN (0.8 mL) afforded **2i**<sup>6</sup> (163.8 mg, 97%, purity: 98%) [eluent: petroleum ether/ethyl acetate = 10/1 (~220 mL) to 5/1 (~240 mL)] as a solid: m.p. 52.4-53.0 °C (petroleum ether/dichloromethane); **<sup>1</sup>H NMR** (400 MHz,  $\text{CDCl}_3$ ):  $\delta$  7.76 (dd,  $J_1 = 8.4$  Hz,  $J_2 = 2.0$  Hz, 1 H, ArH), 7.33 - 7.22 (m, 2 H, ArH), 4.55 (t,  $J = 6.0$  Hz, 2 H,  $\text{CH}_2$ ), 3.05 (t,  $J = 6.0$  Hz, 2 H,  $\text{CH}_2$ ); **<sup>13</sup>C NMR** (100 MHz,  $\text{CDCl}_3$ ):  $\delta$  164.0 (d,  $J = 2.4$  Hz), 161.7 (d,  $J = 245.7$  Hz), 135.3 (d,  $J = 3.1$  Hz), 129.1 (d,  $J = 7.1$  Hz), 126.9 (d,  $J = 7.9$  Hz), 121.0 (d,  $J = 22.1$  Hz), 116.6 (d,  $J = 22.9$  Hz), 67.4, 27.0; **<sup>19</sup>F NMR** (376 MHz,  $\text{CDCl}_3$ ):  $\delta$  -113.64; **MS** (70 eV, EI)  $m/z$  (%): 166 ( $\text{M}^+$ , 59.49), 108 (100); **IR** (neat):  $\nu = 3066, 2922, 1713, 1591, 1492, 1434, 1392, 1306, 1260, 1236, 1127, 1083, 1028 \text{ cm}^{-1}$ .



**(10) Preparation of 6,7-dihydro-4*H*-thieno[3,2-*c*]pyran-4-one **2j** (zhangq-5-019)**

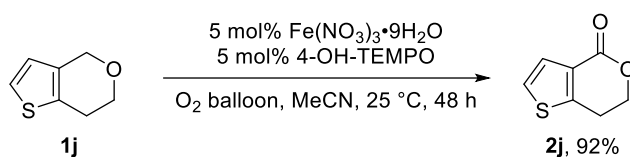

Following **Typical Procedure II**, the reaction of **1j** (140.9 mg, 1.0 mmol),  $\text{Fe}(\text{NO}_3)_3 \cdot 9\text{H}_2\text{O}$  (20.7 mg, 0.05 mmol), 4-OH-TEMPO (8.8 mg, 0.05 mmol) in MeCN (0.8 mL) afforded **2j**<sup>7</sup> (142.7 mg, 92%) [eluent: petroleum ether/ethyl acetate = 10/1 (~220 mL) to 5/1 (~360 mL)] as a solid: m.p. 86.3-87.9 °C (petroleum ether/dichloromethane); <sup>1</sup>H NMR (400 MHz,  $\text{CDCl}_3$ ):  $\delta$  7.44 (d,  $J = 5.2$  Hz, 1 H, ArH), 7.18 (d,  $J = 5.2$  Hz, 1 H, ArH), 4.60 (t,  $J = 6.0$  Hz, 2 H,  $\text{CH}_2$ ), 3.17 (t,  $J = 6.2$  Hz, 2 H,  $\text{CH}_2$ ); <sup>13</sup>C NMR (100 MHz,  $\text{CDCl}_3$ ):  $\delta$  161.2, 148.9, 127.9, 126.7, 123.9, 67.6, 24.5; MS (70 eV, EI)  $m/z$  (%): 154 ( $\text{M}^+$ , 77.8), 124 (100); IR (neat):  $\nu = 3106, 3085, 1704, 1534, 1463, 1413, 1334, 1266, 1238, 1110, 1059, 1032 \text{ cm}^{-1}$ .

**(11) Preparation of 4,5-dihydro-7*H*-thieno[2,3-*c*]pyran-7-one **2k** (zhangq-5-033)**

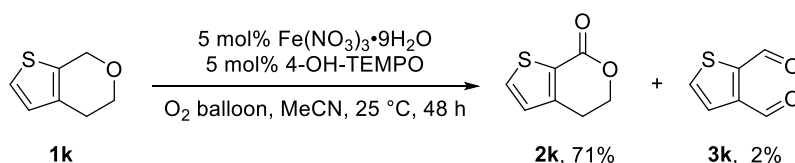

Following **Typical Procedure II**, the reaction of **1k** (140.6 mg, 1.0 mmol),  $\text{Fe}(\text{NO}_3)_3 \cdot 9\text{H}_2\text{O}$  (20.3 mg, 0.05 mmol), 4-OH-TEMPO (8.8 mg, 0.05 mmol) in MeCN (0.8 mL) afforded **2k**<sup>6</sup> (110.0 mg, 71%) and **3k**<sup>13</sup> (3.4 mg, 2%) [eluent: petroleum ether/ethyl acetate = 10/1 (~400 mL) to 8/1 (~400 mL)] as solids.

**2k**: m.p. 54.7-55.3 °C (petroleum ether/dichloromethane); <sup>1</sup>H NMR (400 MHz,  $\text{CDCl}_3$ ):  $\delta$  7.68 (d,  $J = 4.8$  Hz, 1 H, ArH), 7.03 (d,  $J = 4.8$  Hz, 1 H, ArH), 4.60 (t,  $J = 6.0$  Hz, 2 H,  $\text{CH}_2$ ), 3.04 (t,  $J = 6.0$  Hz, 2 H,  $\text{CH}_2$ ); <sup>13</sup>C NMR (100 MHz,  $\text{CDCl}_3$ ):  $\delta$  161.0, 147.5, 134.2, 126.5, 126.2, 68.2, 24.8; MS (70 eV, EI)  $m/z$  (%): 154 ( $\text{M}^+$ , 82.42), 124 (100); IR (neat):  $\nu = 3091, 3075, 2951, 1691, 1540, 1462, 1423, 1391, 1278, 1207, 1083, 1039 \text{ cm}^{-1}$ .

**3k**: <sup>1</sup>H NMR (400 MHz,  $\text{CDCl}_3$ ):  $\delta$  10.49 (s, 1 H, CHO), 10.39 (s, 1 H, CHO), 7.75 (d,  $J = 4.8$  Hz, 1 H, ArH), 7.65 (d,  $J = 5.2$  Hz, 1 H, ArH).

**(12) Preparation of 4-methylisochroman-1-one 2l ( zhangq-4-046)**

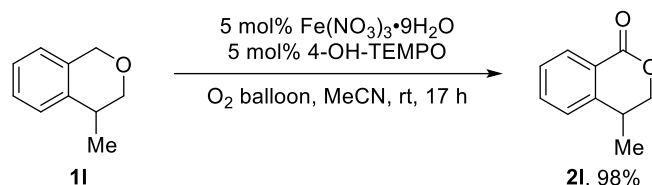

Following **Typical Procedure II**, the reaction of **1l** (147.0 mg, 1.0 mmol), Fe(NO<sub>3</sub>)<sub>3</sub>·9H<sub>2</sub>O (20.5 mg, 0.05 mmol), 4-OH-TEMPO (8.8 mg, 0.05 mmol) in MeCN (0.8 mL) afforded **2l**<sup>6</sup> (156.9 mg, 98%) [eluent: petroleum ether/ethyl acetate = 5/1 (~300 mL)] as an oil: **<sup>1</sup>H NMR** (400 MHz, CDCl<sub>3</sub>): δ 8.10 (d, *J* = 8.0 Hz, 1 H, ArH), 7.58 (td, *J*<sub>1</sub> = 7.5 Hz, *J*<sub>2</sub> = 1.1 Hz, 1 H, ArH), 7.37-7.43 (m, 1 H, ArH), 7.31 (d, *J* = 7.6 Hz, 1 H, ArH), 4.52 (dd, *J*<sub>1</sub> = 10.8 Hz, *J*<sub>2</sub> = 4.0 Hz, 1 H, CH), 4.25 (dd, *J*<sub>1</sub> = 11.2 Hz, *J*<sub>2</sub> = 6.8 Hz, 1 H, CH), 3.22-3.12 (m, 1 H, CH), 1.38 (d, *J* = 7.2 Hz, 3 H, CH<sub>3</sub>); **<sup>13</sup>C NMR** (100 MHz, CDCl<sub>3</sub>): δ 165.1, 144.5, 133.9, 130.4, 127.5, 125.6, 124.4, 72.4, 31.7, 16.6; **MS** (70 eV, EI) *m/z* (%): 162 (M<sup>+</sup>, 47.88), 132 (100); **IR** (neat): ν = 2967, 2880, 1714, 1605, 1464, 1396, 1279, 1123, 1086, 1064, 1019 cm<sup>-1</sup>.

**(13) Preparation of 3-methylisochroman-1-one 2m (zhangq-4-047)**

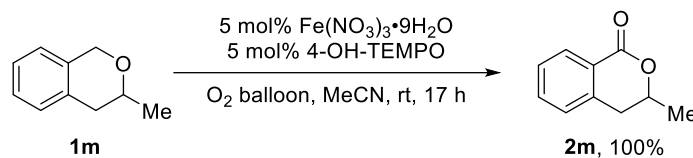

Following **Typical Procedure II**, the reaction of **1m** (147.8 mg, 1.0 mmol), Fe(NO<sub>3</sub>)<sub>3</sub>·9H<sub>2</sub>O (20.9 mg, 0.05 mmol), 4-OH-TEMPO (8.8 mg, 0.05 mmol) in MeCN (0.8 mL) afforded **2m**<sup>6</sup> (161.2 mg, 100%) [eluent: petroleum ether/ethyl acetate = 5/1 (~300 mL)] as an oil: **<sup>1</sup>H NMR** (400 MHz, CDCl<sub>3</sub>): δ 8.10 (d, *J* = 7.6 Hz, 1 H, ArH), 7.54 (t, *J* = 7.4 Hz, 1 H, ArH), 7.39 (t, *J* = 7.6 Hz, 1 H, ArH), 7.24 (d, *J* = 7.6 Hz, 1 H, ArH), 4.75-4.63 (m, 1 H, CH), 3.03-2.88 (m, 2 H, CH<sub>2</sub>), 1.53 (d, *J* = 6.4 Hz, 3 H, CH<sub>3</sub>); **<sup>13</sup>C NMR** (100 MHz, CDCl<sub>3</sub>): δ 165.6, 139.1, 133.7, 130.3, 127.6, 127.3, 125.0, 75.0, 34.9, 20.9; **MS** (70 eV, EI) *m/z* (%): 162 (M<sup>+</sup>, 23.22), 118 (100); **IR** (neat): ν = 2980, 2901, 1708, 1607, 1460, 1387, 1351, 1277, 1119, 1084, 1029 cm<sup>-1</sup>.

**(14) Preparation of (S)-3-methylisochroman-1-one (S)-2m (zhangq-5-080)**

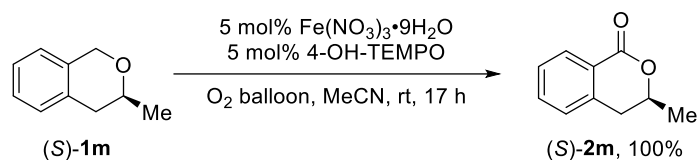

Following **Typical Procedure II**, the reaction of (S)-**1m** (148.9 mg, 1.0 mmol), Fe(NO<sub>3</sub>)<sub>3</sub>•9H<sub>2</sub>O (21.0 mg, 0.05 mmol), 4-OH-TEMPO (8.9 mg, 0.05 mmol) in MeCN (0.8 mL) afforded (S)-**2m**<sup>14</sup> (162.9 mg, 100%, > 99% ee) [eluent: petroleum ether/ethyl acetate = 5/1 (~300 mL)] as an oil: HPLC conditions: AS-H column, hexane/*i*-PrOH = 80/20, 1.0 mL/min, λ = 214 nm, *t*<sub>R</sub>(major) = 8.8 min; [α]<sub>D</sub><sup>26</sup> = +156.6 (*c* = 1.01, CHCl<sub>3</sub>) (reported:<sup>14</sup> [α]<sub>D</sub><sup>22</sup> = +141.0 (*c* = 1.00, CHCl<sub>3</sub>)); <sup>1</sup>H NMR (400 MHz, CDCl<sub>3</sub>): δ 8.10 (d, *J* = 7.6 Hz, 1 H, ArH), 7.54 (t, *J* = 7.0 Hz, 1 H, ArH), 7.39 (t, *J* = 7.6 Hz, 1 H, ArH), 7.24 (d, *J* = 7.6 Hz, 1 H, ArH), 4.75-4.64 (m, 1 H, CH), 3.03-2.88 (m, 2 H, CH<sub>2</sub>), 1.53 (d, *J* = 6.4 Hz, 3 H, CH<sub>3</sub>); <sup>13</sup>C NMR (100 MHz, CDCl<sub>3</sub>): δ 165.3, 138.9, 133.4, 129.7, 127.2, 127.1, 124.6, 74.8, 34.4, 20.5; MS (70 eV, EI) *m/z* (%): 162 (M<sup>+</sup>, 19.58), 118 (100); IR (neat): ν = 1707, 1607, 1460, 1386, 1351, 1277, 1238, 1119, 1084, 1030 cm<sup>-1</sup>.

**(15) Preparation of 1,2-dihydro-4*H*-benzo[*f*]isochromen-4-one 2n (zhangq-4-045)**

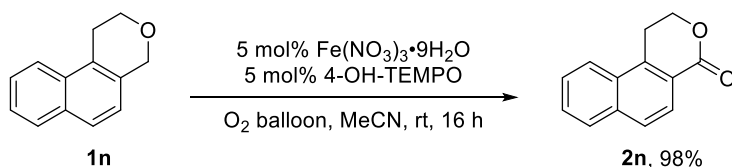

Following **Typical Procedure II**, the reaction of **1n** (184.2 mg, 1.0 mmol), Fe(NO<sub>3</sub>)<sub>3</sub>•9H<sub>2</sub>O (20.3 mg, 0.05 mmol), 4-OH-TEMPO (8.7 mg, 0.05 mmol) in MeCN (0.8 mL) afforded **2n**<sup>7</sup> (195.0 mg, 98%) [eluent: petroleum ether/ethyl acetate = 5/1 (~400 mL)] as a solid: m.p. 106.2-108.4 °C (petroleum ether/dichloromethane); <sup>1</sup>H NMR (400 MHz, CDCl<sub>3</sub>): δ 8.13 (d, *J* = 8.8 Hz, 1 H, ArH), 8.07-8.01 (m, 1 H, ArH), 7.96-7.88 (m, 1 H, ArH), 7.85 (d, *J* = 8.8 Hz, 1 H, ArH), 7.68-7.58 (m, 2 H, ArH), 4.69 (t, *J* = 6.2 Hz, 2 H, CH<sub>2</sub>), 3.46 (t, *J* = 6.2 Hz, 2 H, CH<sub>2</sub>); <sup>13</sup>C NMR (100 MHz, CDCl<sub>3</sub>): δ 165.3, 138.4, 135.3, 129.6, 128.6, 128.5, 127.5, 127.0, 124.9, 124.2, 122.2, 66.5, 23.9; MS (70 eV, EI) *m/z* (%): 198 (M<sup>+</sup>, 95.18), 140 (100); IR (neat): ν = 2998, 1700, 1621, 1462, 1432, 1323, 1278, 1120, 1079 cm<sup>-1</sup>.

**(16) Preparation of dibenzo[*c,e*]oxepin-5(7*H*)-one **2o** (zhangq-5-021, zhangq-5-030)**

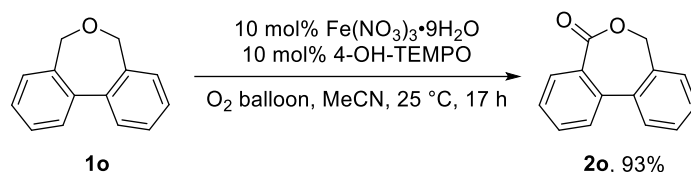

Following **Typical Procedure II**, the reaction of **1o** (194.8 mg, 1.0 mmol), Fe(NO<sub>3</sub>)<sub>3</sub>·9H<sub>2</sub>O (41.7 mg, 0.1 mmol), 4-OH-TEMPO (17.5 mg, 0.1 mmol) in MeCN (0.8 mL) afforded **2o**<sup>6</sup> (194.3 mg, 93%) [eluent: petroleum ether/ethyl acetate = 20/1 (~210 mL) to 10/1 (~220 mL)] as a solid: m.p. 133.7-134.2 °C (petroleum ether/dichloromethane) (reported:<sup>15</sup> m.p. 133-135 °C (petroleum ether/dichloromethane)); <sup>1</sup>H NMR (400 MHz, CDCl<sub>3</sub>): δ 7.99 (d, *J* = 6.8 Hz, 1 H, ArH), 7.73-7.58 (m, 3 H, ArH), 7.53 (d, *J* = 6.8 Hz, 2 H, ArH), 7.48-7.38 (m, 2 H, ArH), 5.05 (s, 1 H, one proton of OCH<sub>2</sub>), 5.00 (s, 1 H, one proton of OCH<sub>2</sub>); <sup>13</sup>C NMR (100 MHz, CDCl<sub>3</sub>): δ 170.1, 138.7, 137.0, 134.6, 132.4, 131.7, 130.4, 129.9, 128.52, 128.48, 128.4, 128.2, 69.0; MS (70 eV, EI) *m/z* (%): 210 (M<sup>+</sup>, 86.47), 165 (100); IR (neat): ν = 1701, 1472, 1377, 1295, 1275, 1228, 1110, 1091, 1045, 1009 cm<sup>-1</sup>.

**(17) Preparation of 7-phenylisochroman-1-one **2p** (zhangq-5-029)**

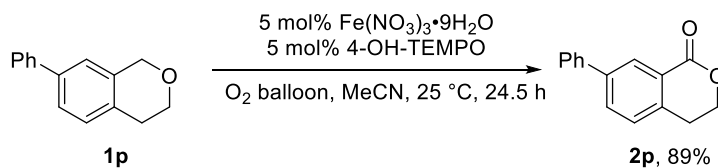

Following **Typical Procedure II**, the reaction of **1p** (210.2 mg, 1.0 mmol), Fe(NO<sub>3</sub>)<sub>3</sub>·9H<sub>2</sub>O (20.0 mg, 0.05 mmol), 4-OH-TEMPO (8.8 mg, 0.05 mmol) in MeCN (0.8 mL) afforded **2p**<sup>16</sup> (199.0 mg, 89%) [eluent: petroleum ether/ethyl acetate = 10/1 (~300 mL) to 5/1 (~300 mL)] as a solid: m.p. 122.7-123.5 °C (petroleum ether/dichloromethane) (reported:<sup>16</sup> m.p. 119-120 °C); <sup>1</sup>H NMR (400 MHz, CDCl<sub>3</sub>): δ 8.35 (d, *J* = 1.6 Hz, 1 H, ArH), 7.77 (d, *J*<sub>1</sub> = 7.6 Hz, *J*<sub>2</sub> = 1.6 Hz, 1 H, ArH), 7.61 (d, *J* = 7.2 Hz, 2 H, ArH), 7.46 (d, *J* = 7.6 Hz, 2 H, ArH), 7.42-7.33 (m, 2 H, ArH), 4.57 (t, *J* = 6.0 Hz, 2 H, CH<sub>2</sub>), 3.10 (t, *J* = 6.0 Hz, 2 H, CH<sub>2</sub>); <sup>13</sup>C NMR (100 MHz, CDCl<sub>3</sub>): δ

164.9, 140.3, 139.1, 138.1, 131.9, 128.7, 128.2, 127.63, 127.58, 126.6, 125.3, 67.1, 27.1;  
**MS** (FI)  $m/z$  (%): 224 ( $M^+$ ); **IR** (neat):  $\nu = 3058, 3015, 1702, 1616, 1482, 1450, 1391,$   
1280, 1225, 1193, 1145, 1065, 1029  $\text{cm}^{-1}$ .

### (18) Preparation of 9H-xanthen-9-one **5** (zhangq-5-038)

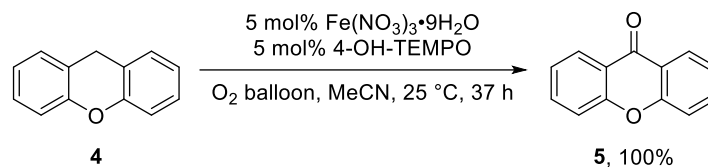

Following **Typical Procedure II**, the reaction of **4** (182.5 mg, 1.0 mmol),  $\text{Fe}(\text{NO}_3)_3 \cdot 9\text{H}_2\text{O}$  (21.0 mg, 0.05 mmol), 4-OH-TEMPO (8.7 mg, 0.05 mmol) in MeCN (0.8 mL) afforded **5**<sup>6</sup> (195.8 mg, 100%) [eluent: petroleum ether/ethyl acetate = 5/1 (~220 mL)] as a solid: m.p. 176.1-176.9 °C (petroleum ether/dichloromethane) (reported:<sup>17</sup> m.p. 176-177 °C); **<sup>1</sup>H NMR** (400 MHz,  $\text{CDCl}_3$ ):  $\delta$  8.32 (d,  $J = 7.6$  Hz, 2 H, ArH), 7.75-7.62 (m, 2 H, ArH), 7.45 (d,  $J = 8.4$  Hz, 2 H, ArH), 7.35 (t,  $J = 7.4$  Hz, 2 H, ArH); **<sup>13</sup>C NMR** (100 MHz,  $\text{CDCl}_3$ ):  $\delta$  177.1, 156.0, 134.7, 126.6, 123.8, 121.7, 117.9; **MS** (70 eV, EI)  $m/z$  (%): 196 ( $M^+$ , 100); **IR** (neat):  $\nu = 1654, 1604, 1478, 1455, 1344,$  1329, 1239, 1213, 1145  $\text{cm}^{-1}$ .

## 3. Large-Scale Reactions:

### (1) Preparation of isobenzofuran-1(3H)-one **2q** (zhangq-3-150)

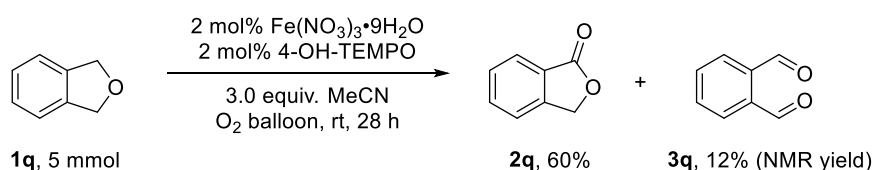

To a 25 mL flask were added  $\text{Fe}(\text{NO}_3)_3 \cdot 9\text{H}_2\text{O}$  (41.0 mg, 0.1 mmol), 4-OH-TEMPO (17.7 mg, 0.1 mmol), **1q** (618.6 mg, 5 mmol, 97% purity), and MeCN (0.8 mL) sequentially. After the installation of an  $\text{O}_2$  balloon, the resulting mixture was stirred at room temperature for 28 h until the completion of the reaction as monitored by TLC (petroleum ether/ethyl acetate = 5/1). The crude reaction mixture was filtrated through a short column of silica gel eluted with ethyl acetate (6 x 20 mL) and concentrated. The reaction afforded 66% NMR yield of **2q** and 12% NMR yield of **3q**, which was

determined by  $^1\text{H}$  NMR analysis of the crude product with  $\text{CH}_2\text{Br}_2$  (70  $\mu\text{L}$ ) as the internal standard. After evaporation, MeCN (10 mL) and a saturated solution of  $\text{NaHSO}_3$  (aq., 10 mL) were added to the residue. The resulting mixture was stirred vigorously at room temperature for 1 h, extracted with ethyl acetate (3 x 20 mL), dried with anhydrous  $\text{Na}_2\text{SO}_4$ , filtrated, and concentrated. The residue was purified by chromatography on silica gel to afford **2q**<sup>7</sup> (400.5 mg, 60%) [eluent: petroleum ether/ethyl acetate = 10/1 (~220 mL) to 5/1 (~600 mL)] as a solid: m.p. 74.0-74.6  $^\circ\text{C}$  (petroleum ether/ethyl ether) (reported:<sup>18</sup> m.p. 74-75  $^\circ\text{C}$ );  $^1\text{H}$  NMR (400 MHz,  $\text{CDCl}_3$ ):  $\delta$  7.90 (d,  $J = 7.6$  Hz, 1 H, ArH), 7.70 (t,  $J = 7.4$  Hz, 1 H, ArH), 7.54 (t,  $J = 7.6$  Hz, 2 H, ArH), 5.33 (s, 2 H,  $\text{CH}_2$ );  $^{13}\text{C}$  NMR (100 MHz,  $\text{CDCl}_3$ ):  $\delta$  170.9, 146.3, 133.8, 128.7, 125.38, 125.36, 121.9, 69.4; MS (70 eV, EI)  $m/z$  (%): 134 ( $\text{M}^+$ , 37.76), 105 (100); IR (neat):  $\nu = 3062, 3018, 1745, 1615, 1594, 1466, 1364, 1287, 1191, 1108$   $\text{cm}^{-1}$ .

**(2) Gram-scale synthesis of isochroman-1-one 2a (zhangq-5-048)**

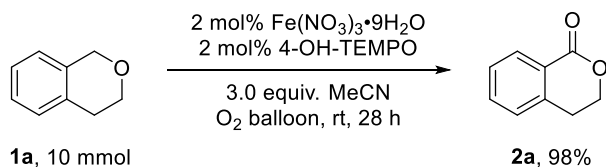

Following **Typical Procedure II**, the reaction of **1a** (1.3389 g, 10 mmol),  $\text{Fe(NO}_3)_3 \cdot 9\text{H}_2\text{O}$  (82.3 mg, 0.2 mmol), and 4-OH-TEMPO (35.4 mg, 0.2 mmol) in MeCN (1.6 mL) afforded **2a** (1.4506 g, 98%) [eluent: petroleum ether/ethyl acetate = 10/1 (~600 mL) to 6/1 (~600 mL)] as an oil:  $^1\text{H}$  NMR (400 MHz,  $\text{CDCl}_3$ ):  $\delta$  8.09 (d,  $J = 7.6$  Hz, 1 H, ArH), 7.54 (t,  $J = 7.4$  Hz, 1 H, ArH), 7.39 (t,  $J = 7.6$  Hz, 1 H, ArH), 7.27 (d,  $J = 7.6$  Hz, 1 H, ArH), 4.54 (t,  $J = 6.0$  Hz, 2 H,  $\text{CH}_2$ ), 3.07 (t,  $J = 6.0$  Hz, 2 H,  $\text{CH}_2$ );  $^{13}\text{C}$  NMR (100 MHz,  $\text{CDCl}_3$ ):  $\delta$  165.0, 139.4, 133.5, 130.2, 127.5, 127.1, 125.1, 67.2, 27.6.

## Mechanistic studies

### (1) Detection of NO<sub>x</sub> (zhangq-5-081)

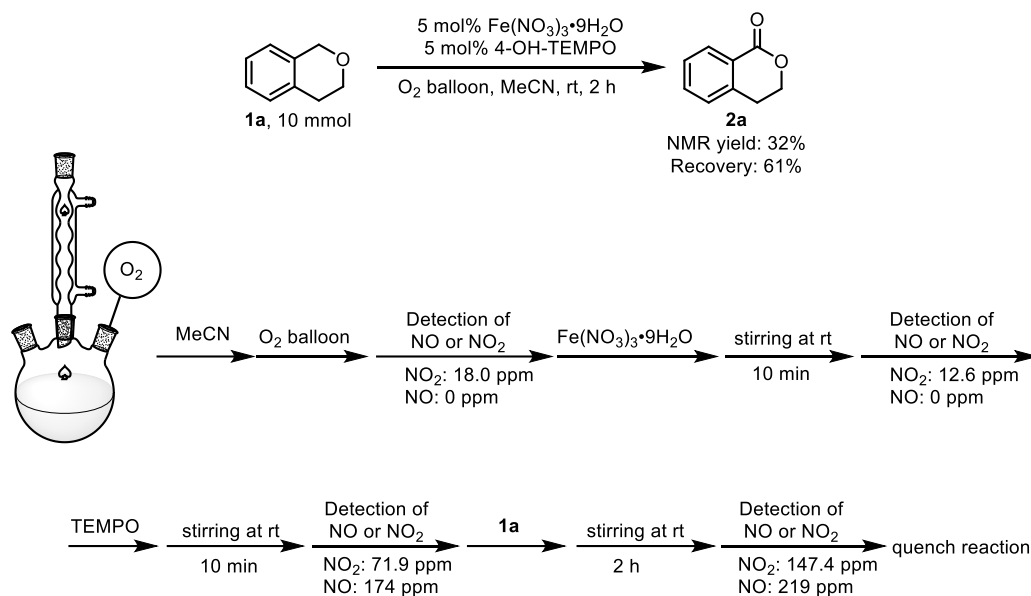

**Scheme S1.** Detection of NO<sub>x</sub> by a flue gas analyzer at the different stages of reaction process.

As shown in Scheme S1, MeCN (8 mL) was added to a three-neck flask, which was followed by the installation of an O<sub>2</sub> balloon. Then the flue gas analyzer detecting NO<sub>x</sub> was connected. Fe(NO<sub>3</sub>)<sub>3</sub>·9H<sub>2</sub>O (208.9 mg, 0.5 mmol) was added to the flask, and the resulting mixture was stirred at rt for 10 min, then NO<sub>x</sub> was again detected by the flue gas analyzer. Next, 4-OH-TEMPO (87.5 mg, 0.5 mmol) was added, NO<sub>x</sub> was detected after stirring the mixture at rt for 10 min. Finally, **1a** (1.3680 g, 10 mmol) was added and the resulting mixture was stirred at rt for 2 h, then NO<sub>x</sub> was once more detected by the flue gas analyzer. The resulting mixture was filtrated through a short column of silica gel eluted with ethyl acetate (3 x 20 mL) and concentrated. The reaction afforded 32% NMR yield of **2a** with 61% recovery of **1a**, which was determined by <sup>1</sup>H NMR analysis of the crude product with CH<sub>2</sub>Br<sub>2</sub> (70 μL) as the internal standard.

### (2) Study on the effect of H<sub>2</sub>O in the aerobic oxidation of isochroman **1a** (zhangq-6-045, zhangq-6-050)

Fe(NO<sub>3</sub>)<sub>3</sub>•9H<sub>2</sub>O (0.05 mmol), 4-OH-TEMPO (0.05 mmol), **1a** (1.0 mmol), anhydrous MeCN (0.8 mL), and H<sub>2</sub>O (X equiv.) were added to a 25 mL flask sequentially, which was followed by the installation of an O<sub>2</sub> balloon. The resulting mixture was stirred at 25 °C for 10 h, diluted with ethyl acetate, and filtrated through a short column of silica gel eluted with ethyl acetate (3 x 20 mL). After evaporation, dibromomethane (35 μL) was added as internal standard for <sup>1</sup>H NMR analysis.

Fe(NO<sub>3</sub>)<sub>3</sub>•9H<sub>2</sub>O (0.05 mmol), 4-OH-TEMPO (0.05 mmol), 5 Å molecular sieves (X mg), **1a** (1.0 mmol), and anhydrous MeCN (0.8 mL) were added to a 25 mL flask sequentially, which was followed by the installation of an O<sub>2</sub> balloon. The resulting mixture was stirred at 25 °C for 10 h, diluted with ethyl acetate, and filtrated through a short column of silica gel eluted with ethyl acetate (3 x 20 mL). After evaporation, dibromomethane (35 μL) was added as internal standard for <sup>1</sup>H NMR analysis.

### (3) Isotopic labelling experiment with <sup>18</sup>O<sub>2</sub> (zhangq-5-034)

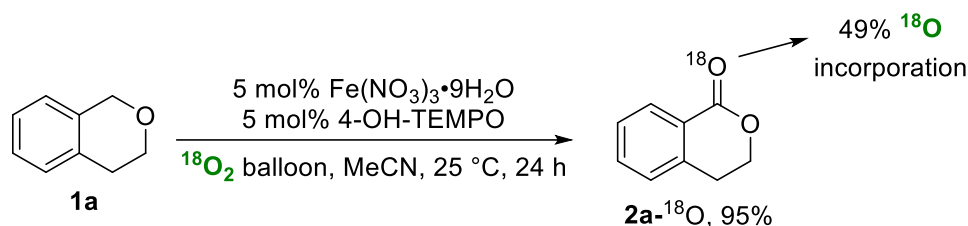

To a 25 mL flask were added Fe(NO<sub>3</sub>)<sub>3</sub>•9H<sub>2</sub>O (20.3 mg, 0.05 mmol), 4-OH-TEMPO (8.8 mg, 0.05 mmol), **1a** (134.0 mg, 1.0 mmol), and MeCN (0.8 mL) sequentially. Then the flask was degassed and refilled with <sup>18</sup>O<sub>2</sub> by an <sup>18</sup>O<sub>2</sub> balloon. After the installation of an <sup>18</sup>O<sub>2</sub> balloon, the resulting mixture was stirred at room temperature for 24 h until the completion of the reaction as monitored by TLC (petroleum ether/ethyl acetate = 5/1). The crude reaction mixture was filtrated through a short column of silica gel eluted with ethyl acetate (3 x 20 mL). After evaporation, the residue was purified by chromatography on silica gel to afford **2a-<sup>18</sup>O** (138.0 mg, 95%, 49% <sup>18</sup>O) [eluent: petroleum ether/ethyl acetate = 8/1(~230 mL) to 6/1(~280 mL)] as an oil: <sup>1</sup>H NMR (400 MHz, CDCl<sub>3</sub>): δ 8.07 (d, *J* = 7.6 Hz, 1 H, ArH), 7.54 (t, *J* = 7.4 Hz, 1 H, ArH), 7.38 (t, *J* = 7.6 Hz, 1 H, ArH), 7.28 (d, *J* = 7.6 Hz, 1 H, ArH), 4.53 (t, *J* = 6.0 Hz, 2 H, CH<sub>2</sub>), 3.06 (t, *J* = 6.0 Hz, 2 H, CH<sub>2</sub>); <sup>13</sup>C NMR (100 MHz, CDCl<sub>3</sub>):



$\delta$  164.89, 164.86, 139.4, 133.4, 130.0, 127.4, 127.1, 125.0, 67.1, 27.5; **MS** (70 eV, EI)  $m/z$  (%): 150 ( $M(^{16}O^{18}O)^+$ , 40.17), 148 ( $M(^{16}O_2)^+$ , 41.6), 90 (100); **HRMS** calcd  $m/z$  for  $C_9H_8^{16}O^{18}O$  [ $M^+$ ]: 150.0561, found: 150.0560,  $C_9H_8^{16}O_2$  [ $M^+$ ]: 148.0519, found: 148.0520; **IR** (neat):  $\nu = 1719, 1688, 1606, 1459, 1392, 1292, 1241, 1118, 1060, 1027$   $cm^{-1}$ .

The  $^{18}O$ % incorporation of **2a**- $^{18}O$  was determined via the analysis of MS spectrum. Due to the known natural abundance of the stable isotopes of C, H, and O, the naturally occurring isotopic  $^{18}O$  will also produce  $[M(^{18}O)]^+$  peak: According to the natural abundance of  $^{18}O$ , the ratio of  $C_9H_8^{16}O_2:C_9H_8^{16}O^{18}O$  is 99.76:0.2. Thus, the intensity of  $[M(^{16}O^{18}O)]$  ( $C_9H_8^{16}O^{18}O$ ) peak would be 0.2% of the intensity of the molecular peak  $[M(^{16}O_2)]$  ( $C_9H_8^{16}O_2$ ). According to the MS spectrum of **2a**- $^{18}O$ , the relative abundance of **2a**-( $^{16}O_2$ ) 148  $[M(^{16}O_2)]$  and **2a**-( $^{16}O^{18}O$ ) 150  $[M(^{16}O^{18}O)]$  are 41.6 and 40.17, respectively. The  $^{18}O$ % of **2a**- $^{18}O$  can be calculated as follows:  $([M(^{16}O^{18}O)]^+ - [M(^{16}O_2)]^+ \times 0.2\%) / ([M(^{16}O^{18}O)]^+ - [M(^{16}O_2)]^+ \times 0.2\% + [M(^{16}O_2)]^+) = (40.17 - 41.6 \times 0.2\%) / (40.17 - 41.6 \times 0.2\% + 41.6) = 49\%$ .

#### (4) Isotopic labelling experiment with $H_2^{18}O$ (zhangq-5-036)

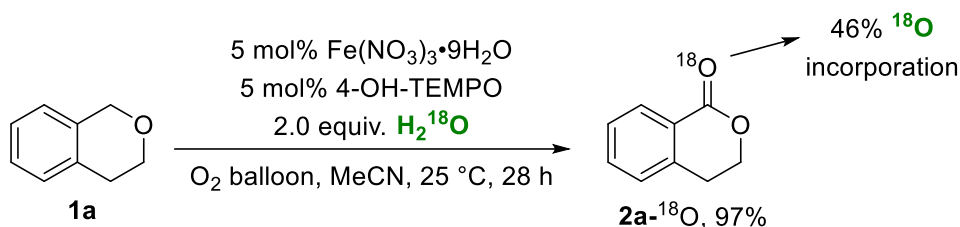

**Typical Procedure III:**  $Fe(NO_3)_3 \cdot 9H_2O$  (20.3 mg, 0.05 mmol), 4-OH-TEMPO (8.7 mg, 0.05 mmol), **1a** (134.7 mg, 1.0 mmol),  $H_2^{18}O$  (36  $\mu L$ ,  $d = 1.11$  g/mL, 2.0 mmol), and  $MeCN$  (0.8 mL) were added to a 25 mL flask sequentially, which was followed by the installation of an  $O_2$  balloon. The resulting mixture was stirred at room temperature for 28 h until the completion of the reaction as monitored by TLC (petroleum ether/ethyl acetate = 5/1) and filtrated through a short column of silica gel eluted with ethyl acetate (3 x 20 mL). After evaporation, the residue was purified by chromatography on silica gel to afford **2a**- $^{18}O$  (142.0 mg, 97%, 46%  $^{18}O$ ) [eluent: petroleum ether/ethyl acetate = 8/1 (~230 mL) to 6/1 (~280 mL)] as an oil:  $^1H$  NMR

(400 MHz, CDCl<sub>3</sub>):  $\delta$  8.05 (d,  $J$  = 8.0 Hz, 1 H, ArH), 7.54 (t,  $J$  = 7.6 Hz, 1 H, ArH), 7.38 (t,  $J$  = 7.6 Hz, 1 H, ArH), 7.28 (d,  $J$  = 7.6 Hz, 1 H, ArH), 4.52 (t,  $J$  = 6.0 Hz, 2 H, CH<sub>2</sub>), 3.06 (t,  $J$  = 6.0 Hz, 2 H, CH<sub>2</sub>); <sup>13</sup>C NMR (100 MHz, CDCl<sub>3</sub>):  $\delta$  164.83, 164.80, 139.3, 133.4, 129.9, 127.3, 127.1, 124.9, 67.0, 27.4; MS (70 eV, EI)  $m/z$  (%): 150 (M (<sup>16</sup>O<sup>18</sup>O)<sup>+</sup>, 39.94), 148 (M (<sup>16</sup>O<sub>2</sub>)<sup>+</sup>, 46), 90 (100).

The <sup>18</sup>O% incorporation of **2a**-<sup>18</sup>O was determined via the analysis of MS spectrum. Based on the known natural abundance of the stable isotopes of C, H, and O, the naturally occurring isotopic <sup>18</sup>O will also produce [M (<sup>18</sup>O)]<sup>+</sup> peak. According to the natural abundance of <sup>18</sup>O, the ratio of C<sub>9</sub>H<sub>8</sub><sup>16</sup>O<sub>2</sub>:C<sub>9</sub>H<sub>8</sub><sup>16</sup>O<sup>18</sup>O is 99.76:0.2. Thus, the intensity of [M (<sup>16</sup>O<sup>18</sup>O)] (C<sub>9</sub>H<sub>8</sub><sup>16</sup>O<sup>18</sup>O) peak will be 0.2% of the intensity of the molecular peak [M (<sup>16</sup>O<sub>2</sub>)] (C<sub>9</sub>H<sub>8</sub><sup>16</sup>O<sub>2</sub>). According to the MS spectrum of **2a**-<sup>18</sup>O, the relative abundance of **2a**-(<sup>16</sup>O<sub>2</sub>) 148 [M (<sup>16</sup>O<sub>2</sub>)] and **2a**-(<sup>16</sup>O<sup>18</sup>O) 150 [M (<sup>16</sup>O<sup>18</sup>O)] are 46 and 39.94 respectively. The <sup>18</sup>O% of **2a**-(<sup>16</sup>O<sup>18</sup>O) can be calculated as follows:  $([M (<sup>16</sup>O<sup>18</sup>O)]^+ - [M (<sup>16</sup>O<sub>2</sub>)]^+ \times 0.2\%) / ([M (<sup>16</sup>O<sup>18</sup>O)]^+ - [M (<sup>16</sup>O<sub>2</sub>)]^+ \times 0.2\% + [M (<sup>16</sup>O<sub>2</sub>)]^+) = (39.94 - 46 \times 0.2\%) / (39.94 - 46 \times 0.2\% + 46) = 46\%$ .

#### (5) The reaction of **2a** with the addition of H<sub>2</sub><sup>18</sup>O (zhangq-6-040)

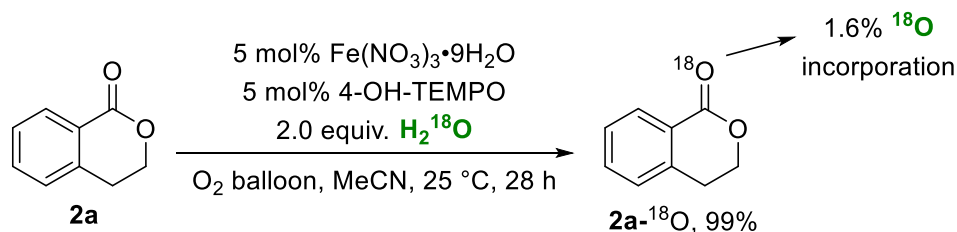

Following **Typical Procedure III**, the reaction of **2a** (0.1482 g, 1.0 mmol), Fe(NO<sub>3</sub>)<sub>3</sub>·9H<sub>2</sub>O (20.5 mg, 0.05 mmol), and 4-OH-TEMPO (8.8 mg, 0.05 mmol) in MeCN (0.8 mL) afforded **2a**-<sup>18</sup>O (147.6 mg, 99%, 99% purity, 1.6% <sup>18</sup>O) [eluent: petroleum ether/ethyl acetate = 4/1 (~250 mL)] as an oil: <sup>1</sup>H NMR (400 MHz, CDCl<sub>3</sub>):  $\delta$  8.06 (d,  $J$  = 7.6 Hz, 1 H, ArH), 7.54 (t,  $J$  = 7.2 Hz, 1 H, ArH), 7.38 (t,  $J$  = 7.6 Hz, 1 H, ArH), 7.28 (d,  $J$  = 7.6 Hz, 1 H, ArH), 4.52 (t,  $J$  = 6.0 Hz, 2 H, CH<sub>2</sub>), 3.06 (t,  $J$  = 6.0 Hz, 2 H, CH<sub>2</sub>); <sup>13</sup>C NMR (100 MHz, CDCl<sub>3</sub>):  $\delta$  164.8, 139.3, 133.4, 129.9, 127.3, 127.0, 124.9, 67.0, 27.4; MS (70 eV, EI)  $m/z$  (%): 150 (M (<sup>16</sup>O<sup>18</sup>O)<sup>+</sup>, 1.11), 148 (M (<sup>16</sup>O<sub>2</sub>)<sup>+</sup>, 61.04), 118 (100).

The  $^{18}\text{O}$ % incorporation of  $2\mathbf{a}$ - $^{18}\text{O}$  was determined via the analysis of MS spectrum. Based on the known natural abundance of the stable isotopes of C, H, and O, the naturally occurring isotopic  $^{18}\text{O}$  will also produce  $[\text{M}(^{18}\text{O})]^+$  peak. According to the natural abundance of  $^{18}\text{O}$ , the ratio of  $\text{C}_9\text{H}_8^{16}\text{O}_2:\text{C}_9\text{H}_8^{16}\text{O}^{18}\text{O}$  is 99.76:0.2. Thus, the intensity of  $[\text{M}(^{16}\text{O}^{18}\text{O})]$  ( $\text{C}_9\text{H}_8^{16}\text{O}^{18}\text{O}$ ) peak will be 0.2% of the intensity of the molecular peak  $[\text{M}(^{16}\text{O}_2)]$  ( $\text{C}_9\text{H}_8^{16}\text{O}_2$ ). According to the MS spectrum of  $2\mathbf{a}$ - $^{18}\text{O}$ , the relative abundance of  $2\mathbf{a}$ -( $^{16}\text{O}_2$ ) 148  $[\text{M}(^{16}\text{O}_2)]$  and  $2\mathbf{a}$ -( $^{16}\text{O}^{18}\text{O}$ ) 150  $[\text{M}(^{16}\text{O}^{18}\text{O})]$  are 61.04 and 1.11 respectively. The  $^{18}\text{O}$ % of  $2\mathbf{a}$ -( $^{16}\text{O}^{18}\text{O}$ ) can be calculated as follows:  $([\text{M}(^{16}\text{O}^{18}\text{O})]^+ - [\text{M}(^{16}\text{O}_2)]^+ \times 0.2\%) / ([\text{M}(^{16}\text{O}^{18}\text{O})]^+ - [\text{M}(^{16}\text{O}_2)]^+ \times 0.2\% + [\text{M}(^{16}\text{O}_2)]^+) = (1.11 - 61.04 \times 0.2\%) / (1.11 - 61.04 \times 0.2\% + 61.04) = 1.6\%$ .

#### **(6) Monitoring the aerobic oxidation of isochroman $1\mathbf{a}$ and *o*-ethylbenzyl alcohol $6$ (zhangq-6-053)**

$\text{Fe}(\text{NO}_3)_3 \cdot 9\text{H}_2\text{O}$  (102.9 mg, 0.25 mmol), 4-OH-TEMPO (43.8 mg, 0.25 mmol),  $1\mathbf{a}$  (0.6830 g, 5.0 mmol),  $6$  (0.7004 g, 5.0 mmol, 97% purity), MeCN (4 mL), and mesitylene (internal standard, 140  $\mu\text{L}$ ,  $d = 0.861 \text{ g/mL}$ , 120.5 mg, 1.0 mmol) were added to a 25 mL flask sequentially, which was followed by the installation of an  $\text{O}_2$  balloon. The resulting mixture was stirred at 25  $^\circ\text{C}$ . An aliquot (0.1 mL) of the resulting mixture was taken after each indicated time shown in Table S3. The aliquot was filtrated through a short column of silica gel eluted with DCM (4 mL) and diethyl ether (4 mL). After evaporation, the NMR yield and recovery were determined by  $^1\text{H}$  NMR analysis.

**Table S1.** Monitoring the aerobic oxidation of isochroman  $1\mathbf{a}$  and *o*-ethylbenzyl alcohol  $6$

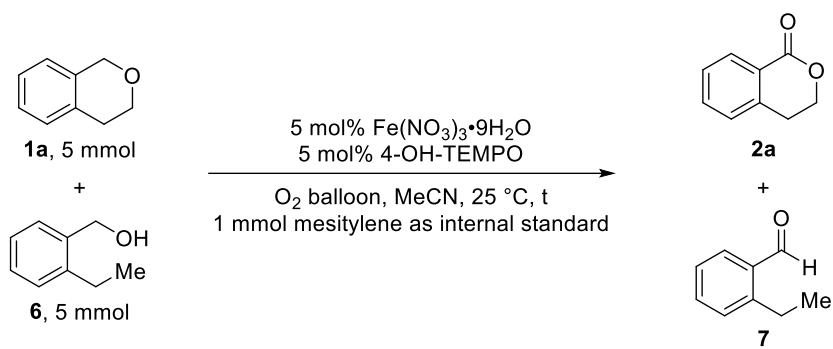

| Entry | time (h) | Recovery of <b>1a</b> (%) | NMR Yield of <b>2a</b> (%) | Recovery of <b>6</b> (%) | NMR Yield of <b>7</b> (%) |
|-------|----------|---------------------------|----------------------------|--------------------------|---------------------------|
| 1     | 2        | 100                       | 2                          | 50                       | 40                        |
| 2     | 4        | 86                        | 12                         | 4                        | 96                        |
| 3     | 6        | 72                        | 28                         | 0                        | 100                       |
| 4     | 8        | 60                        | 40                         | 0                        | 100                       |
| 5     | 10       | 49                        | 51                         | 0                        | 100                       |
| 6     | 12       | 24                        | 80                         | 0                        | 100                       |

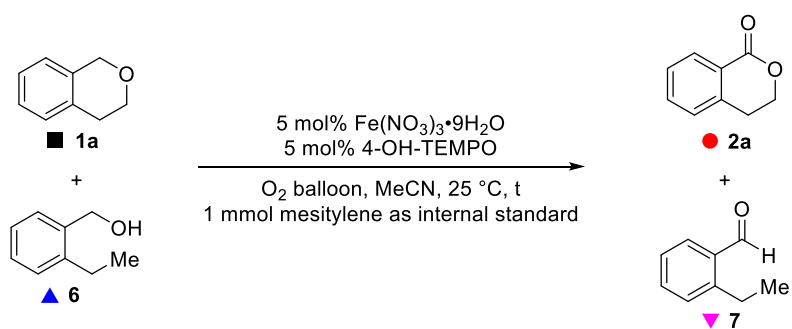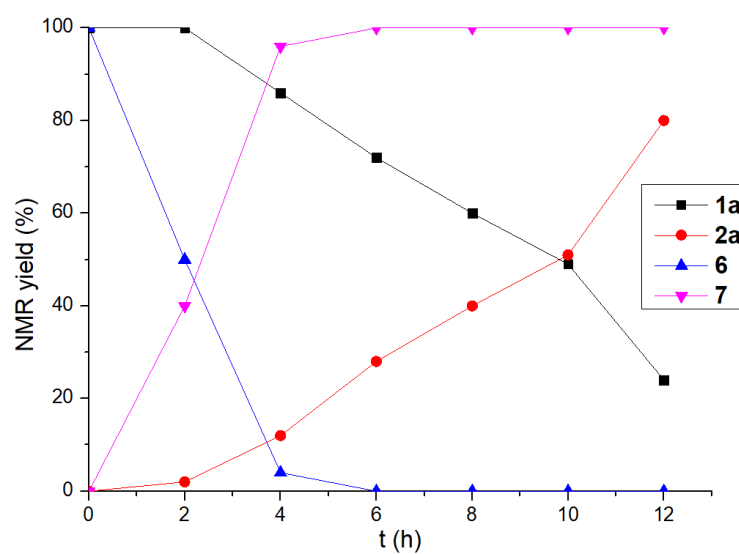

## References:

1. Xia, Q.; Wang, Q.; Yan, C.; Dong, J.; Song, H.; Li, L.; Liu, Y.; Wang, Q.; Liu, X.; Song, H. Merging Photoredox with Brønsted Acid Catalysis: The Cross-Dehydrogenative C-O Coupling for  $sp^3$  C-H Bond Peroxidation. *Chem. Eur. J.* **2017**, *23*, 10871-10877.
2. Yun, S.; Kim, E.; Kim, H.; Ha, T.; Suh, K.-H.; Lee, G. Method of Preparing Thieno[3,2-C]Pyridine Derivatives and Intermediates Used Therein. WO 2005087779 A1, 2005.
3. Page, P. C. B.; Rassias, G. A.; Barros, D.; Ardakani, A.; Bethell, D.; Merifield, E. New Organocatalysts for the Asymmetric Catalytic Epoxidation of Alkenes Mediated by Chiral Iminium Salts. *Synlett* **2002**, 580-582.
4. (a) For synthetic method of (*S*)-**S2**, see: Xu, D.; Li, Z.; Ma, S. Novozym-435-catalyzed Enzymatic Separation of Racemic Propargylic Alcohols. A Facile Route to Optically Active Terminal Aryl Propargylic Alcohols. *Tetrahedron Lett.* **2003**, *44*, 6343-6346. (b) For report on the analytical data of (*S*)-**S2**, see: Alsafadi, D.; Alsalman, S.; Paradisi, F., Extreme Halophilic Alcohol Dehydrogenase Mediated Highly Efficient Syntheses of Enantiopure Aromatic Alcohols. *Org. Biomol. Chem.* **2017**, *15*, 9169-9175.
5. Kerti, G.; Kurtán, T.; Illyés, T.-Z.; Kövér, K. E.; Sólyom, S.; Pescitelli, G.; Fujioka, N.; Berova, N.; Antus, S. Enantioselective Synthesis of 3-Methylisochromans and Determination of Their Absolute Configurations by Circular Dichroism. *Eur. J. Org. Chem.* **2007**, *2007*, 296-305.
6. Zhang, Z.; Gao, Y.; Liu, Y.; Li, J.; Xie, H.; Li, H.; Wang, W. Organocatalytic Aerobic Oxidation of Benzylic  $sp^3$  C-H Bonds of Ethers and Alkylarenes Promoted by a Recyclable TEMPO Catalyst. *Org. Lett.* **2015**, *17*, 5492-5495.
7. Geng, P.; Tang, Y.; Pan, G.; Wang, W.; Hu, J.; Cai, Y. A g-C<sub>3</sub>N<sub>4</sub>-based Heterogeneous Photocatalyst for Visible Light Mediated Aerobic Benzylic C-H Oxygenations. *Green Chem.* **2019**, *21*, 6116-6122.
8. Bose, N. K.; Chaudhury, D. N. Dihydroisocoumarins-X: The Preparation and Reduction of Some O-Carboxyphenylacetates. *Tetrahedron* **1964**, *20*, 49-51.
9. Schultz, A. G.; Kirincich, S. J. An Efficient Preparation and Selected Birch-Reduction Alkylations of 3,4-Dihydro-4,5-dialkyl-2-benzopyran-1-ones. *J. Org. Chem.* **1996**, *61*, 5631-5634.
10. Rioz-Martínez, A.; de Gonzalo, G.; Torres Pazmiño, D. E.; Fraaije, M. W.; Gotor, V. Enzymatic Baeyer-Villiger Oxidation of Benzo-Fused Ketones: Formation of Regiocomplementary Lactones. *Eur. J. Org. Chem.* **2009**, *15*, 2526-2532.
11. Yanai, H.; Taguchi, T. Organic Acid Induced Olefination Reaction of Lactones. *Chem. Commun.* **2012**, *48*, 8967-8969.
12. Odasso, G.; Winters, G., [Cyclic Hydrazides. IV. Synthesis of 2-Amino-3,4-Dihydroisoquinolin-1(2H)-One]. *Farmaco Sci* **1978**, *33*, 148-155.
13. Michnowicz, T.; Borca, B.; Pétuya, R.; Schendel, V.; Pristl, M.; Pentegov, I.; Kraft, U.; Klauk, H.; Wahl, P.; Mutombo, P.; Jelínek, P.; Arnau, A.; Schlickum, U.; Kern, K. Controlling Single

- Molecule Conductance by a Locally Induced Chemical Reaction on Individual Thiophene Units. *Angew. Chem. Int. Ed.* **2020**, *59*, 6207-6212.
14. Li, W.; Wagener, T.; Hellmann, L.; Daniliuc, C. G.; Mück-Lichtenfeld, C.; Neugebauer, J.; Glorius, F. Design of Ru(II)-NHC-Diamine Precatalysts Directed by Ligand Cooperation: Applications and Mechanistic Investigations for Asymmetric Hydrogenation. *J. Am. Chem. Soc.* **2020**, *142*, 7100-7107.
  15. Ujjainwalla, F.; Da Mata, M. L. E. N.; Pennell, A. M. K.; Escolano, C.; Motherwell, W. B.; Vázquez, S. Synthesis of Biaryls via Intramolecular Free Radical Ipso-Substitution Reactions. *Tetrahedron* **2015**, *71*, 6701-6719.
  16. Hamada, S.; Yano, K.; Kobayashi, Y.; Kawabata, T.; Furuta, T. Oxidation of Cyclic Benzylic Ethers by an Electronically Tuned Nitroxyl Radical. *Tetrahedron Lett.* **2021**, *83*, 153404.
  17. Ju, Z.-Y.; Song, L.-N.; Chong, M.-B.; Cheng, D.-G.; Hou, Y.; Zhang, X.-M.; Zhang, Q.-H.; Ren, L.-H. Selective Aerobic Oxidation of C<sub>sp<sup>3</sup></sub>-H Bonds Catalyzed by Yeast-Derived Nitrogen, Phosphorus, and Oxygen Codoped Carbon Materials. *J. Org. Chem.* **2022**, *87*, 3978-3988.
  18. Laudadio, G.; Govaerts, S.; Wang, Y.; Ravelli, D.; Koolman, H. F.; Fagnoni, M.; Djuric, S. W.; Noël, T. Selective C(sp<sup>3</sup>)-H Aerobic Oxidation Enabled by Decatungstate Photocatalysis in Flow. *Angew. Chem. Int. Ed.* **2018**, *57*, 4078-4082.

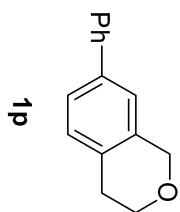

Zhangq-5-028-H  
 Mar 11 2022  
 SOLVENT: CDCl3  
 NA = 4  
 F1 = 400.130005 MHz  
 F2 = 1.000000 MHz

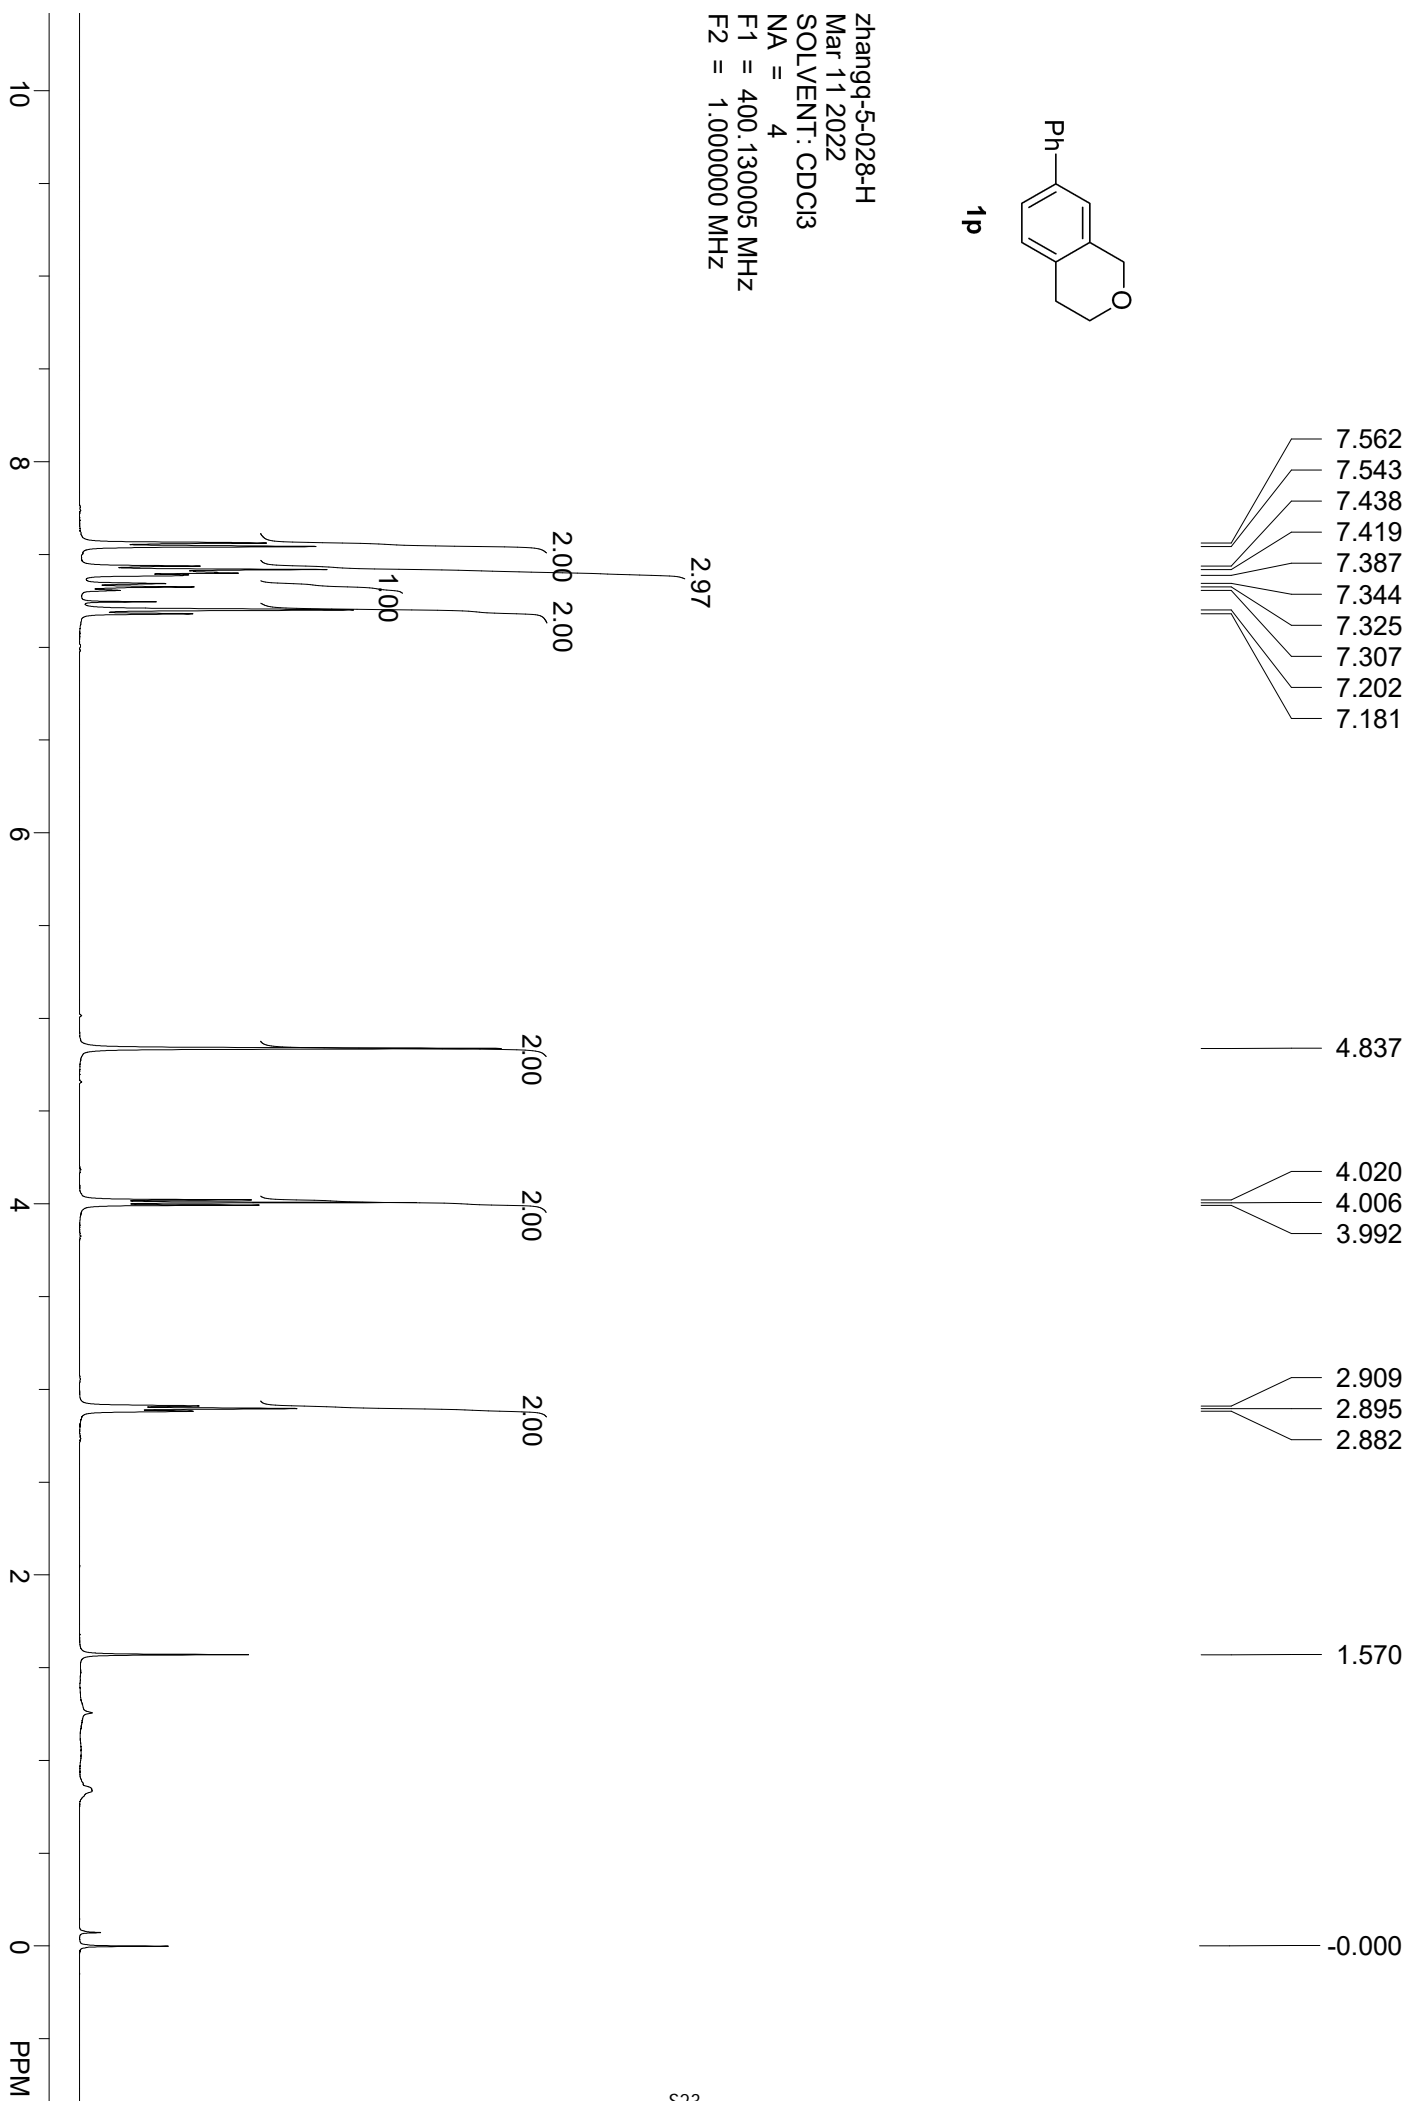

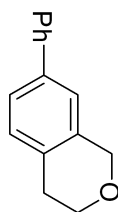

1p

Zhangq-5-028-C  
Mar 11 2022  
SOLVENT: CDCl3  
NA = 64  
F1 = 100.612770 MHz  
F2 = 1.000000 MHz

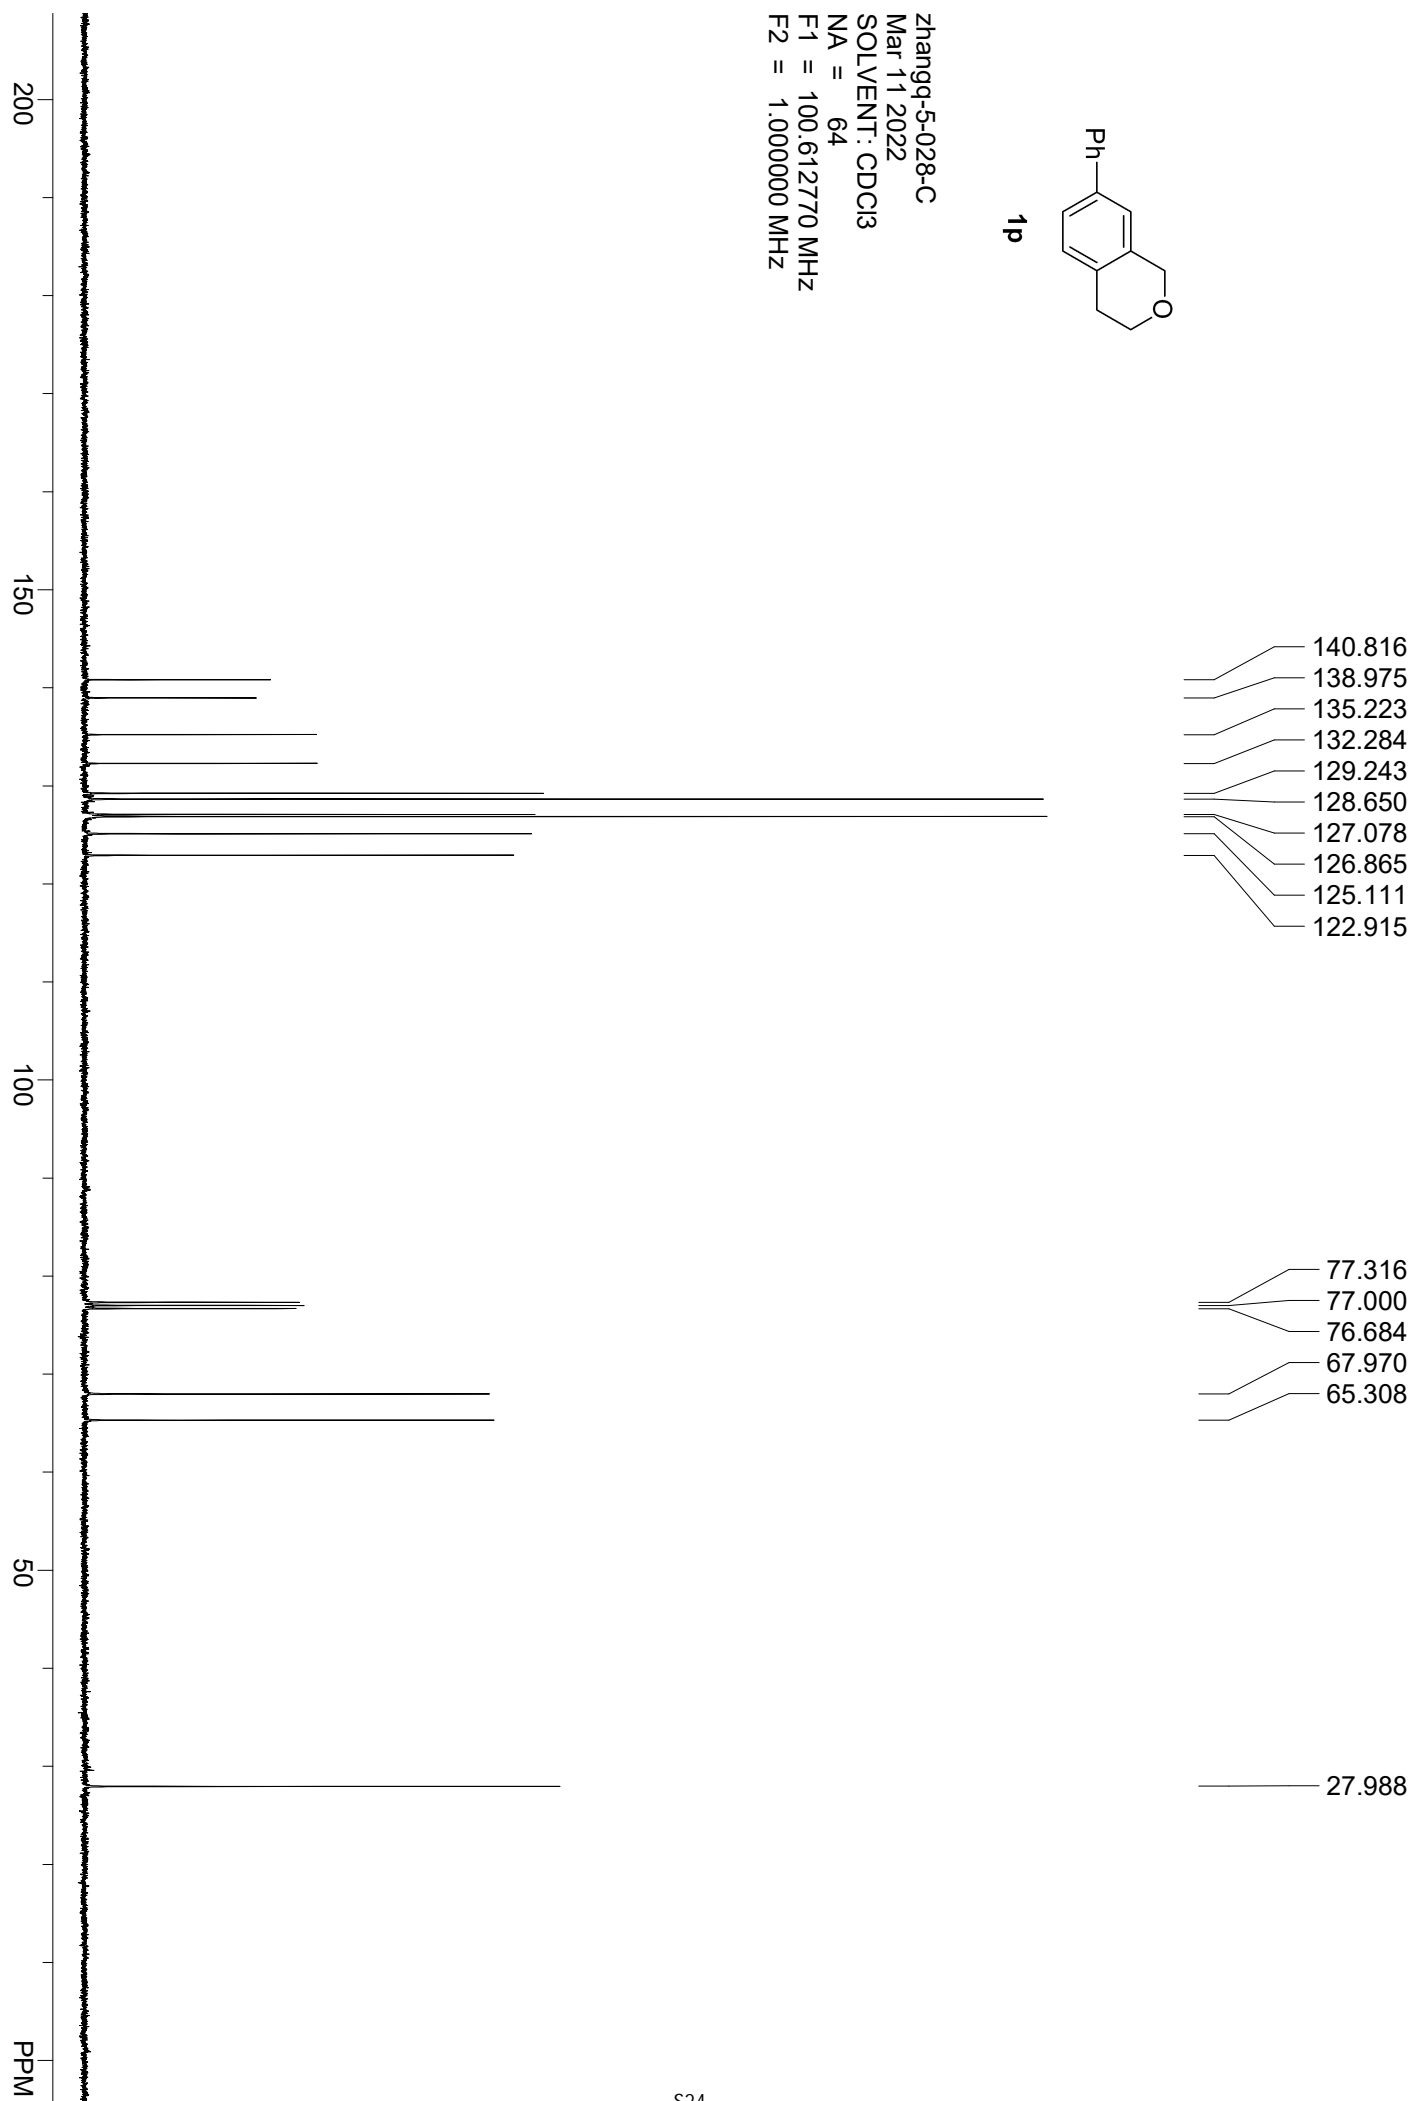



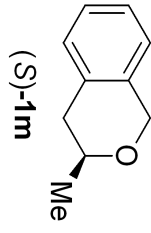

Zhangq-5-077-H  
Jun 22 2022  
SOLVENT: CDCl3  
NA = 4  
F1 = 400.130005 MHz  
F2 = 1.000000 MHz

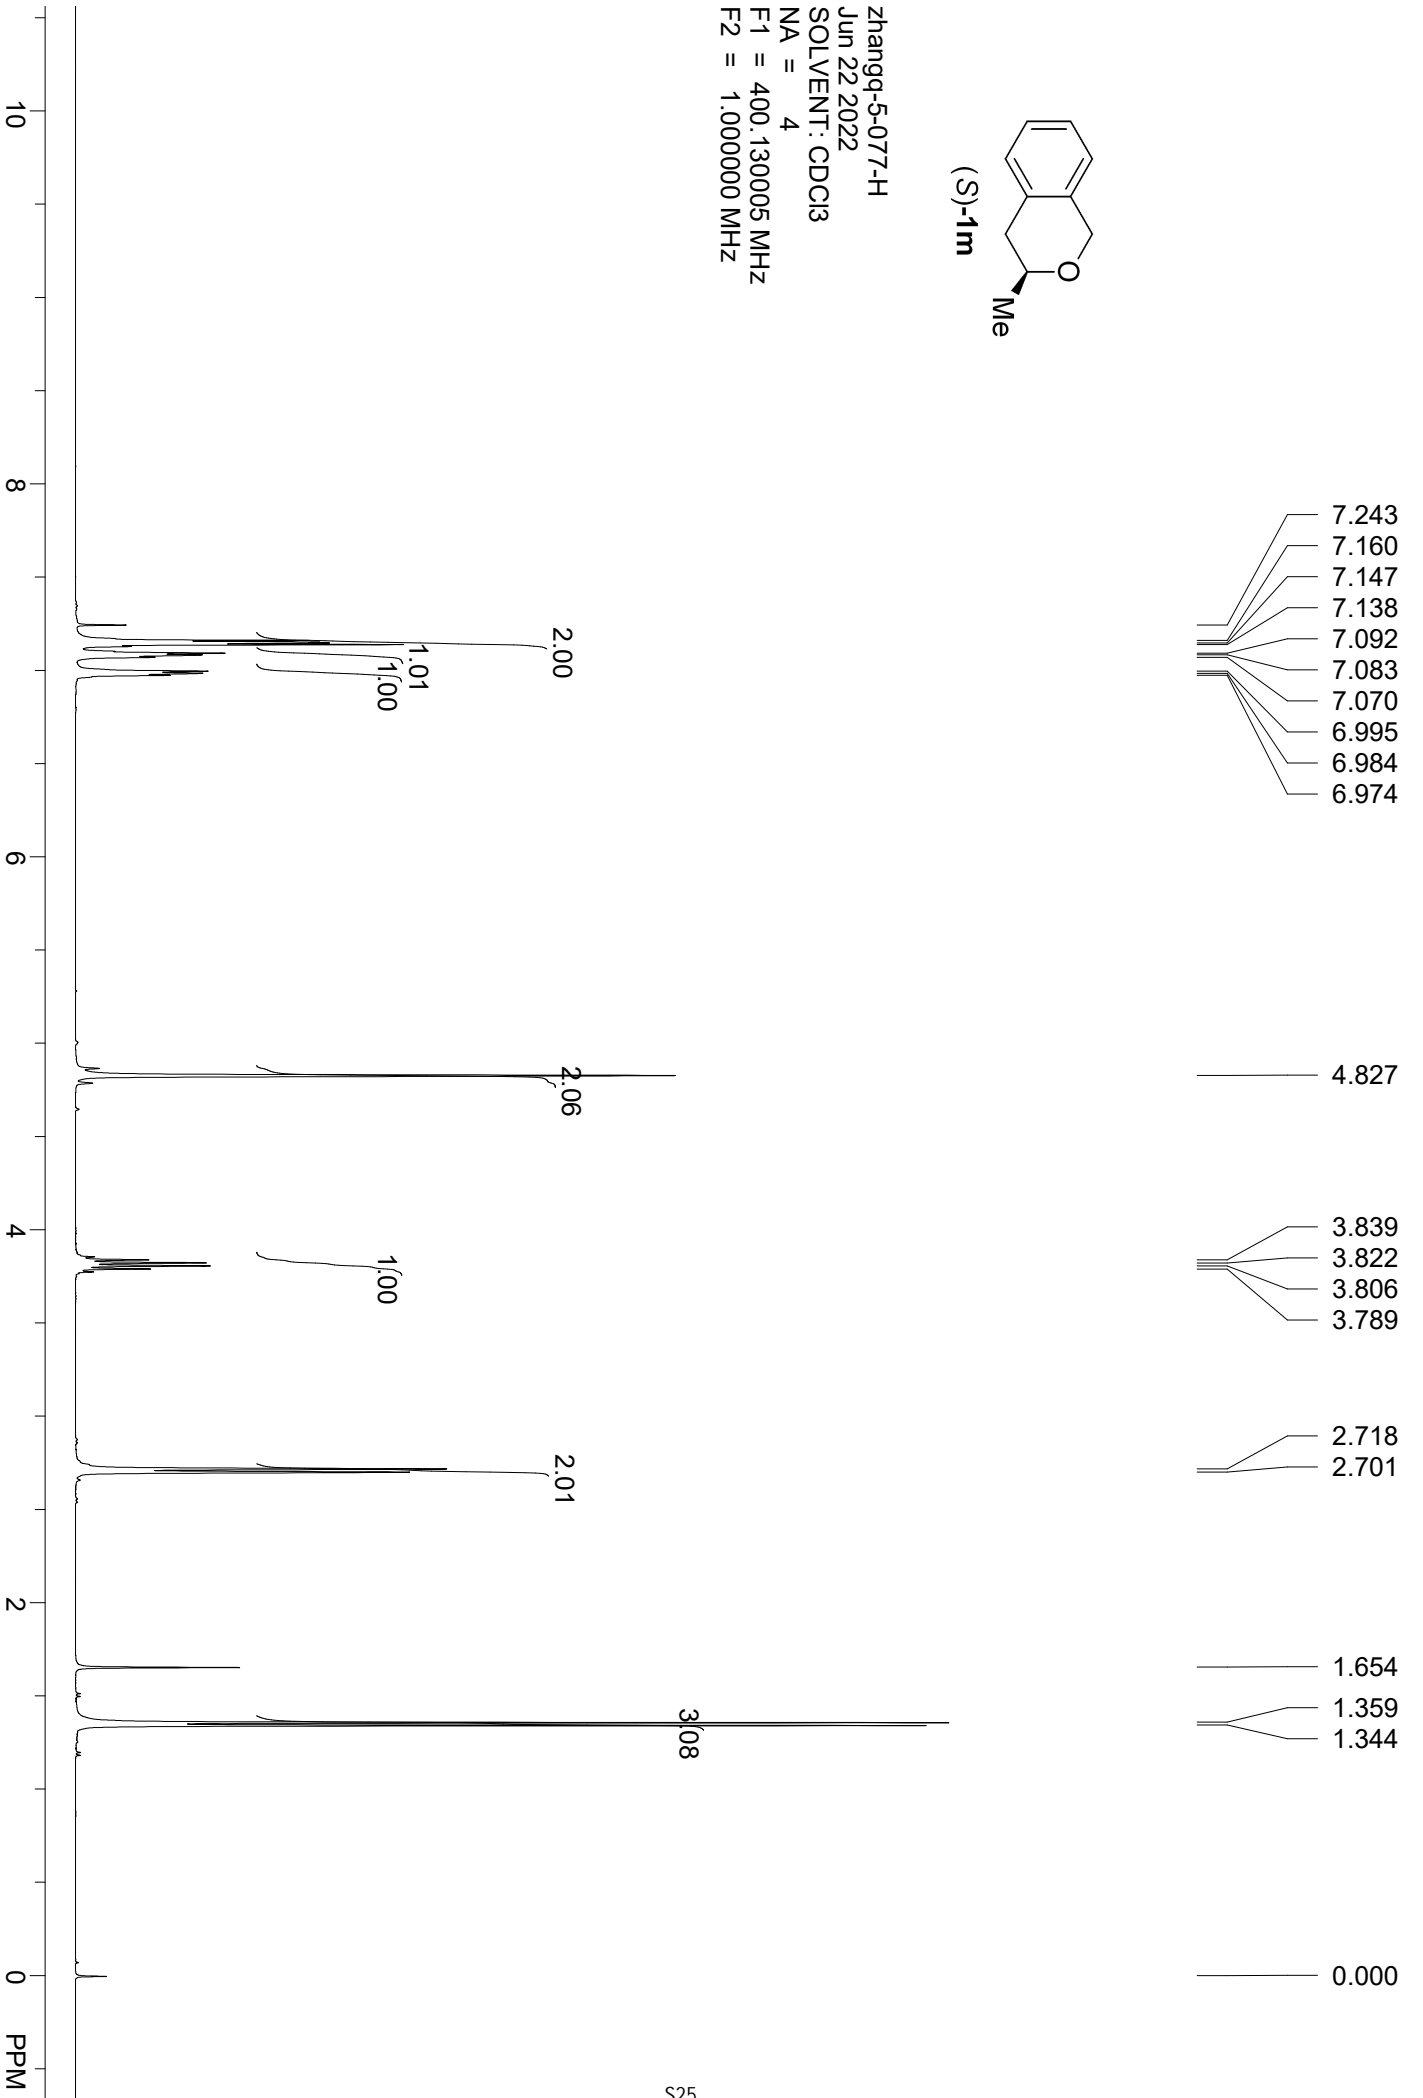

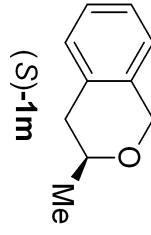

Zhangq-5-077-C  
Jun 22 2022  
SOLVENT: CDCl3  
NA = 150  
F1 = 100.612770 MHz  
F2 = 1.000000 MHz

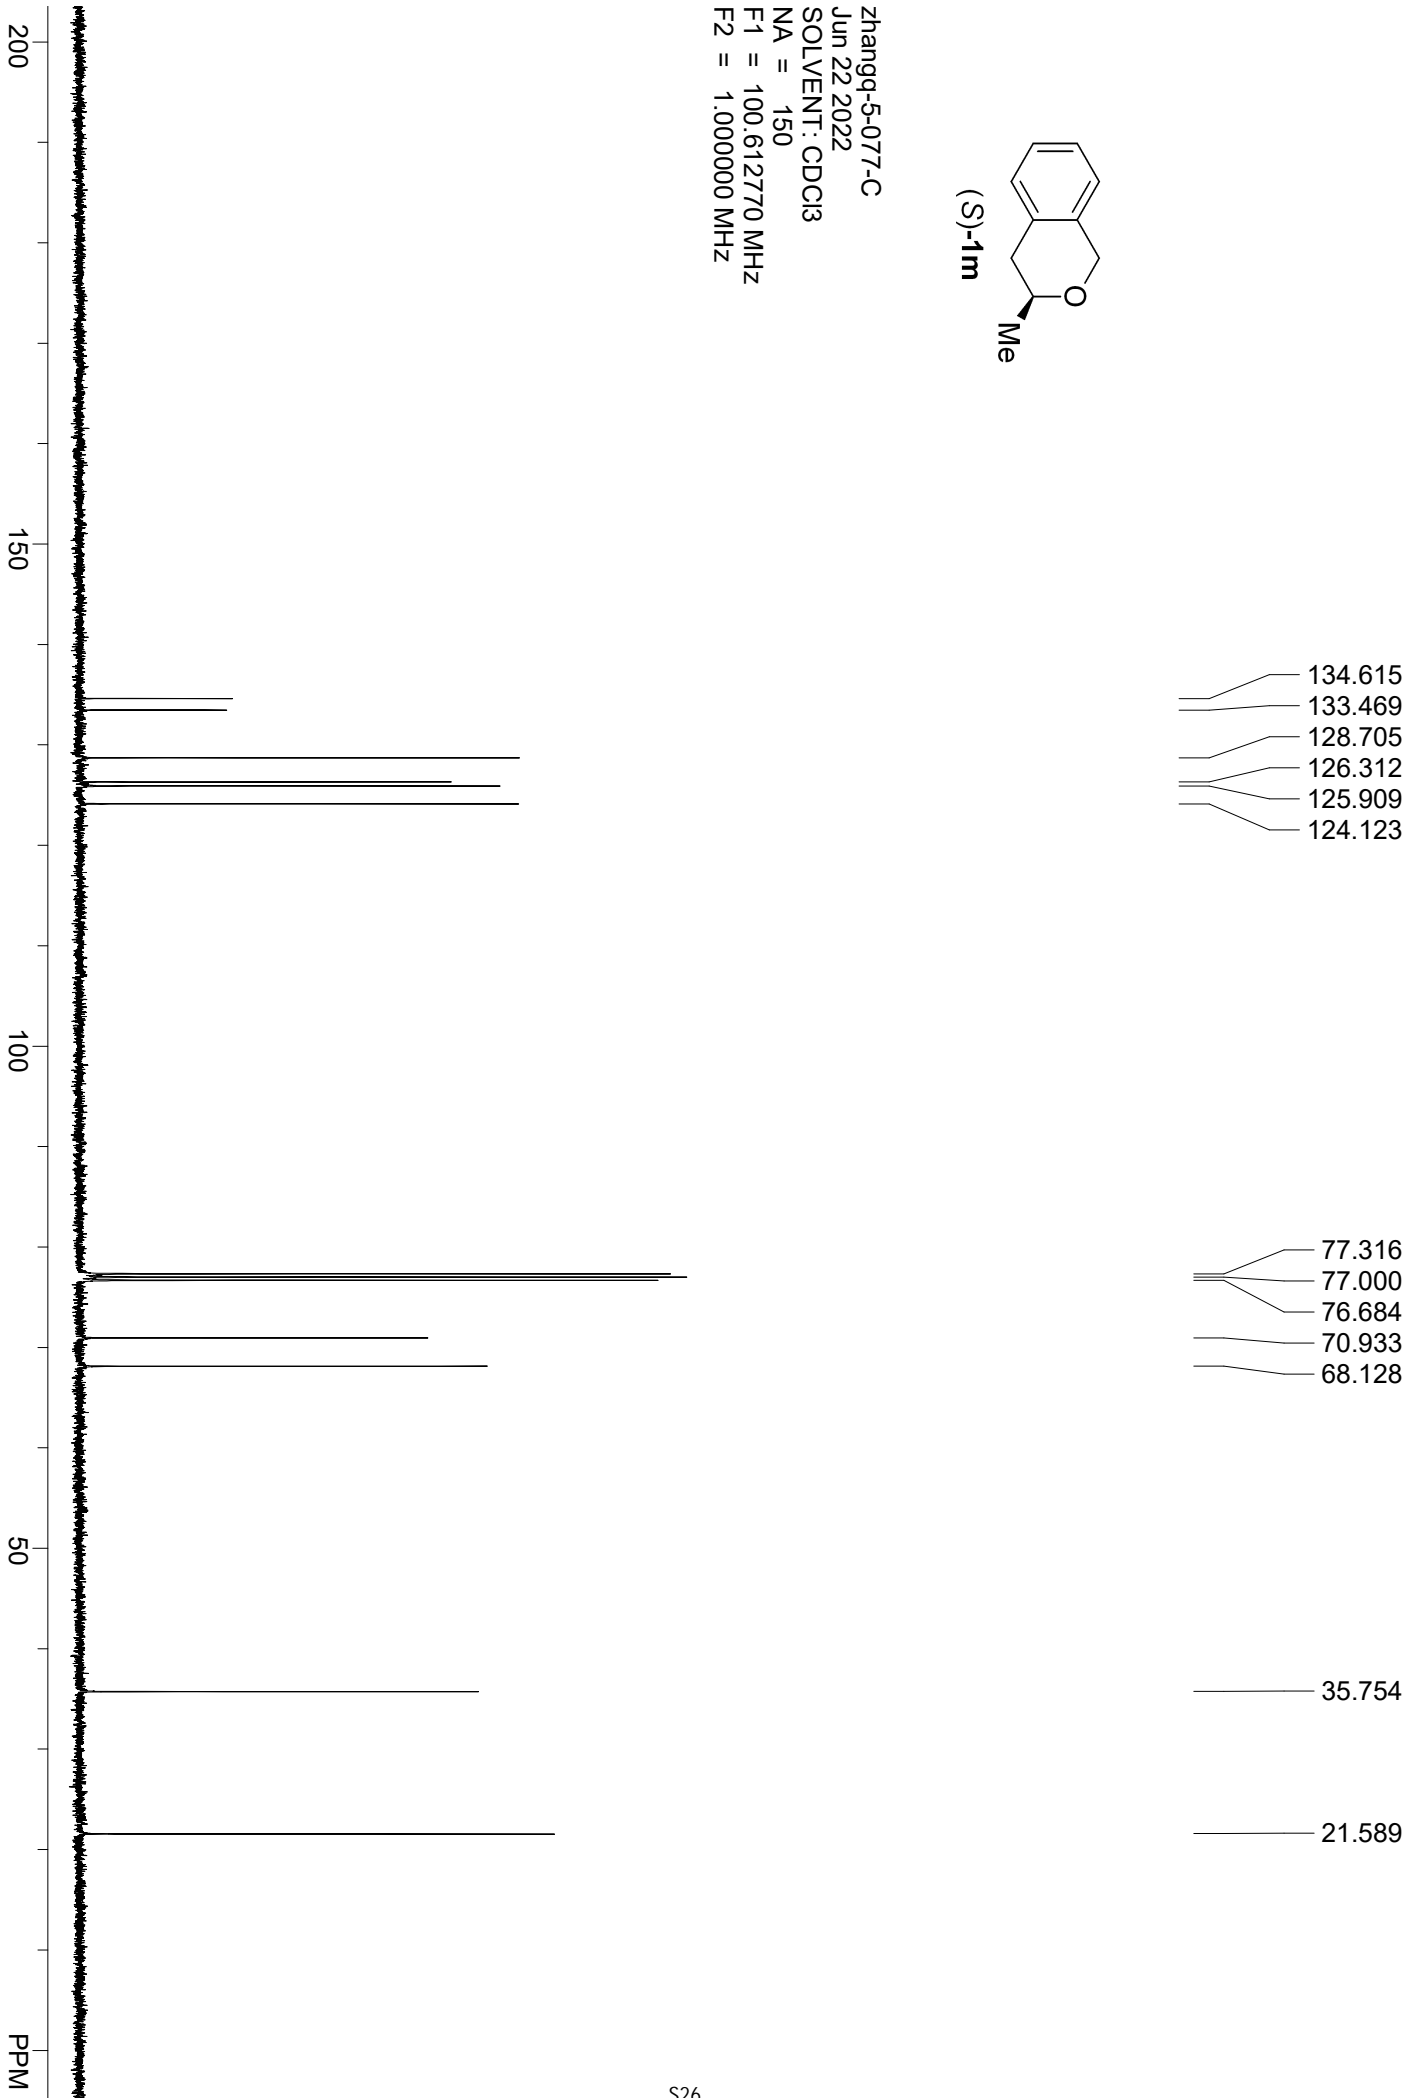

# Area Percent Report

sample zhangq-4-043-rac-OD-H-99.5-0.5-0.5-214

Data file: C:\Users\Public\Documents\ChemStation\1\Data\zhangq 2022-06-22 14-13-37\004-P2-D1-zhangq-4-043-rac.D

Acquisition Data:

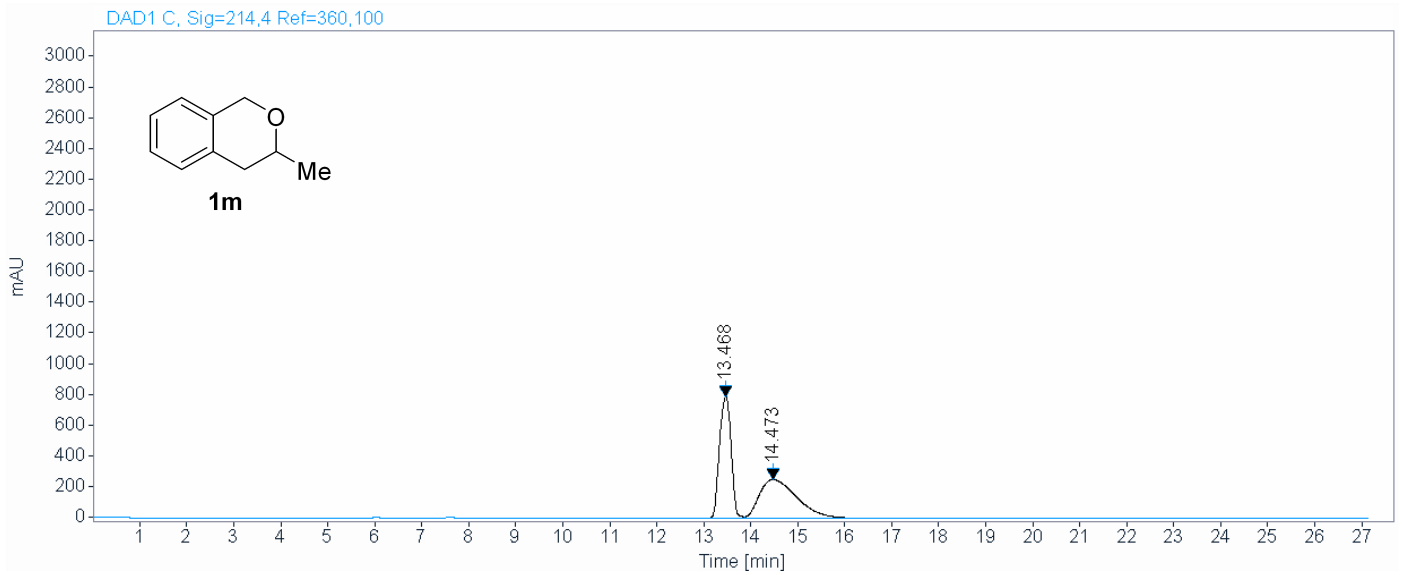

Signal: DAD1 C, Sig=214,4 Ref=360,100

| RT [min] | Width [min] | Height   | Area       | Area%    |
|----------|-------------|----------|------------|----------|
| 13.468   | 0.2918      | 793.2661 | 13721.1797 | 49.1886  |
| 14.473   | 0.8920      | 252.8439 | 14173.8564 | 50.8114  |
| Sum      |             |          | 27895.0361 | 100.0000 |

# Area Percent Report

sample zhangq-5-077-OD-H-99.5-0.5-0.5-214

Data file: C:\Users\Public\Documents\ChemStation\1\Data\zhangq 2022-06-22 14-13-37\005-P2-D2-zhangq-5-077.D

Acquisition Data:

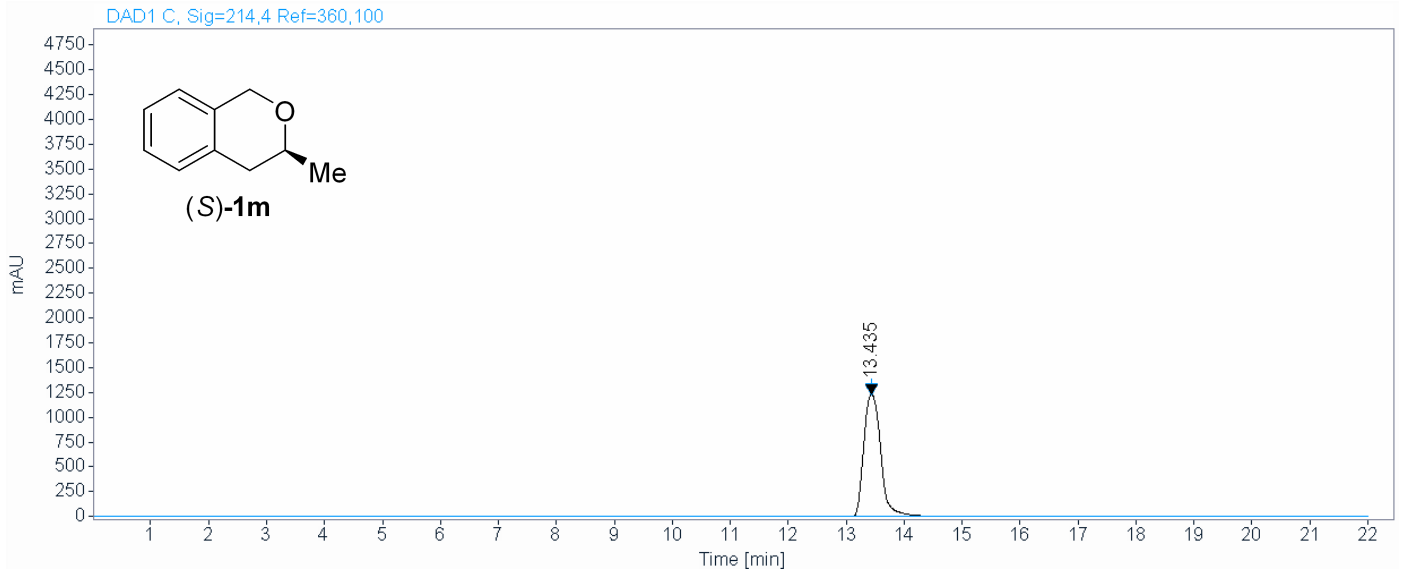

Signal: DAD1 C, Sig=214,4 Ref=360,100

| RT [min] | Width [min] | Height    | Area       | Area%    |
|----------|-------------|-----------|------------|----------|
| 13.435   | 0.3312      | 1229.4689 | 25211.7051 | 100.0000 |
|          | Sum         |           | 25211.7051 | 100.0000 |

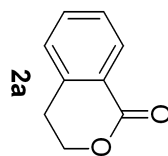

Zhangq-5-061-H  
Jun 08 2022  
SOLVENT: CDCl3  
NA = 4  
F1 = 400.129974 MHz  
F2 = 1.000000 MHz

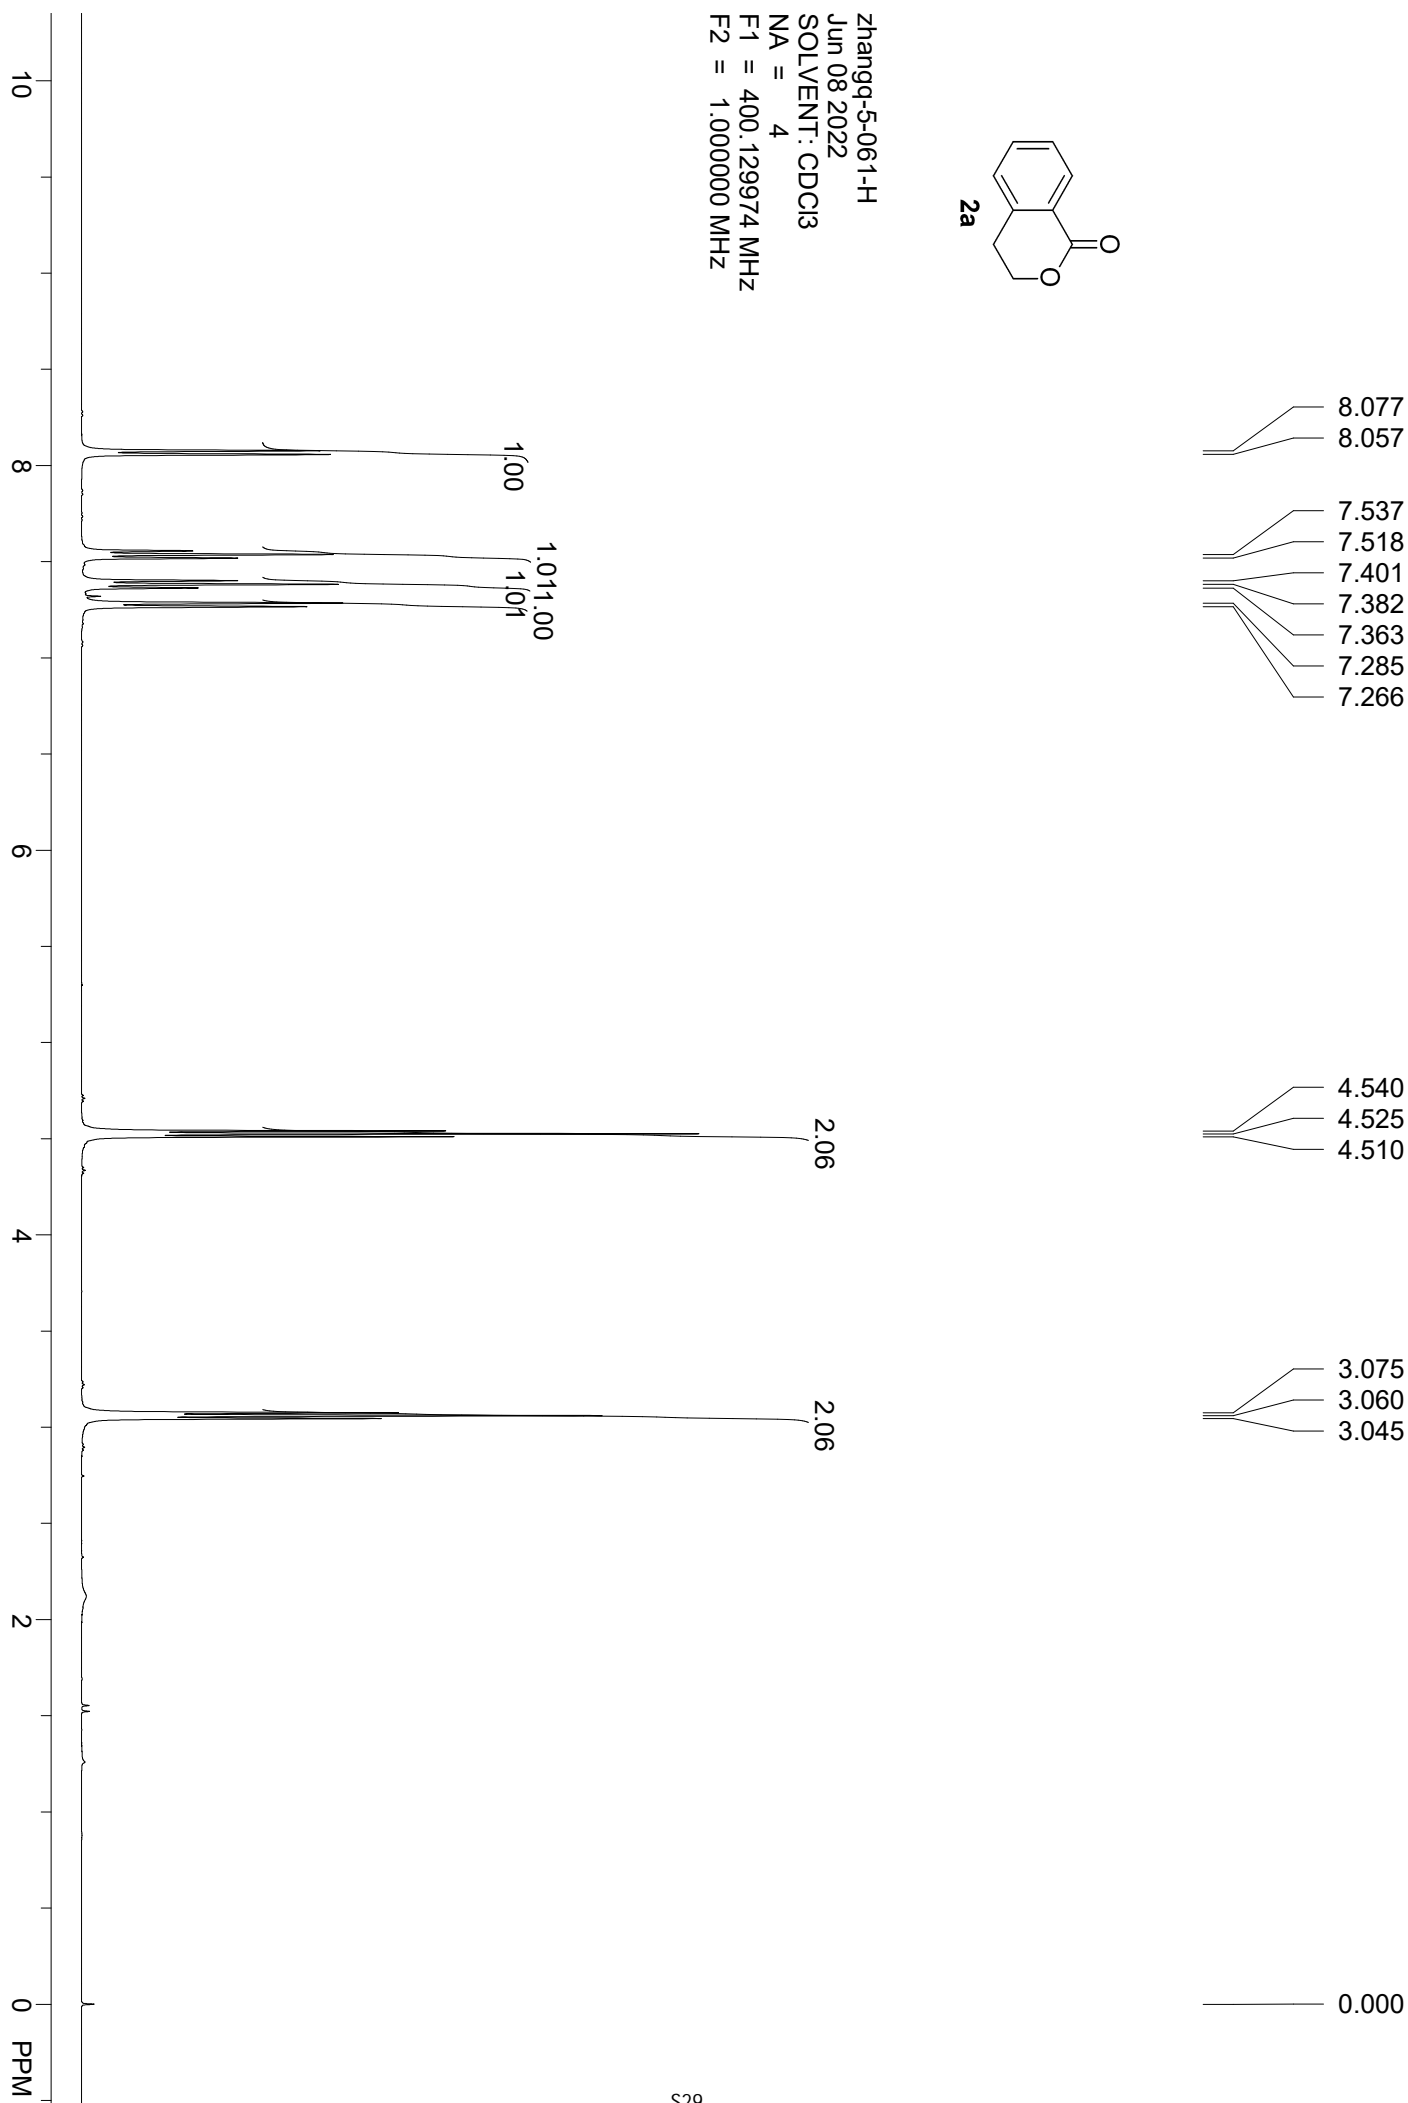

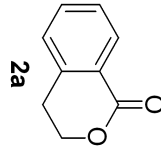

Zhangq-5-061-C  
Jun 08 2022  
SOLVENT: CDCl3  
NA = 64  
F1 = 100.612770 MHz  
F2 = 1.000000 MHz

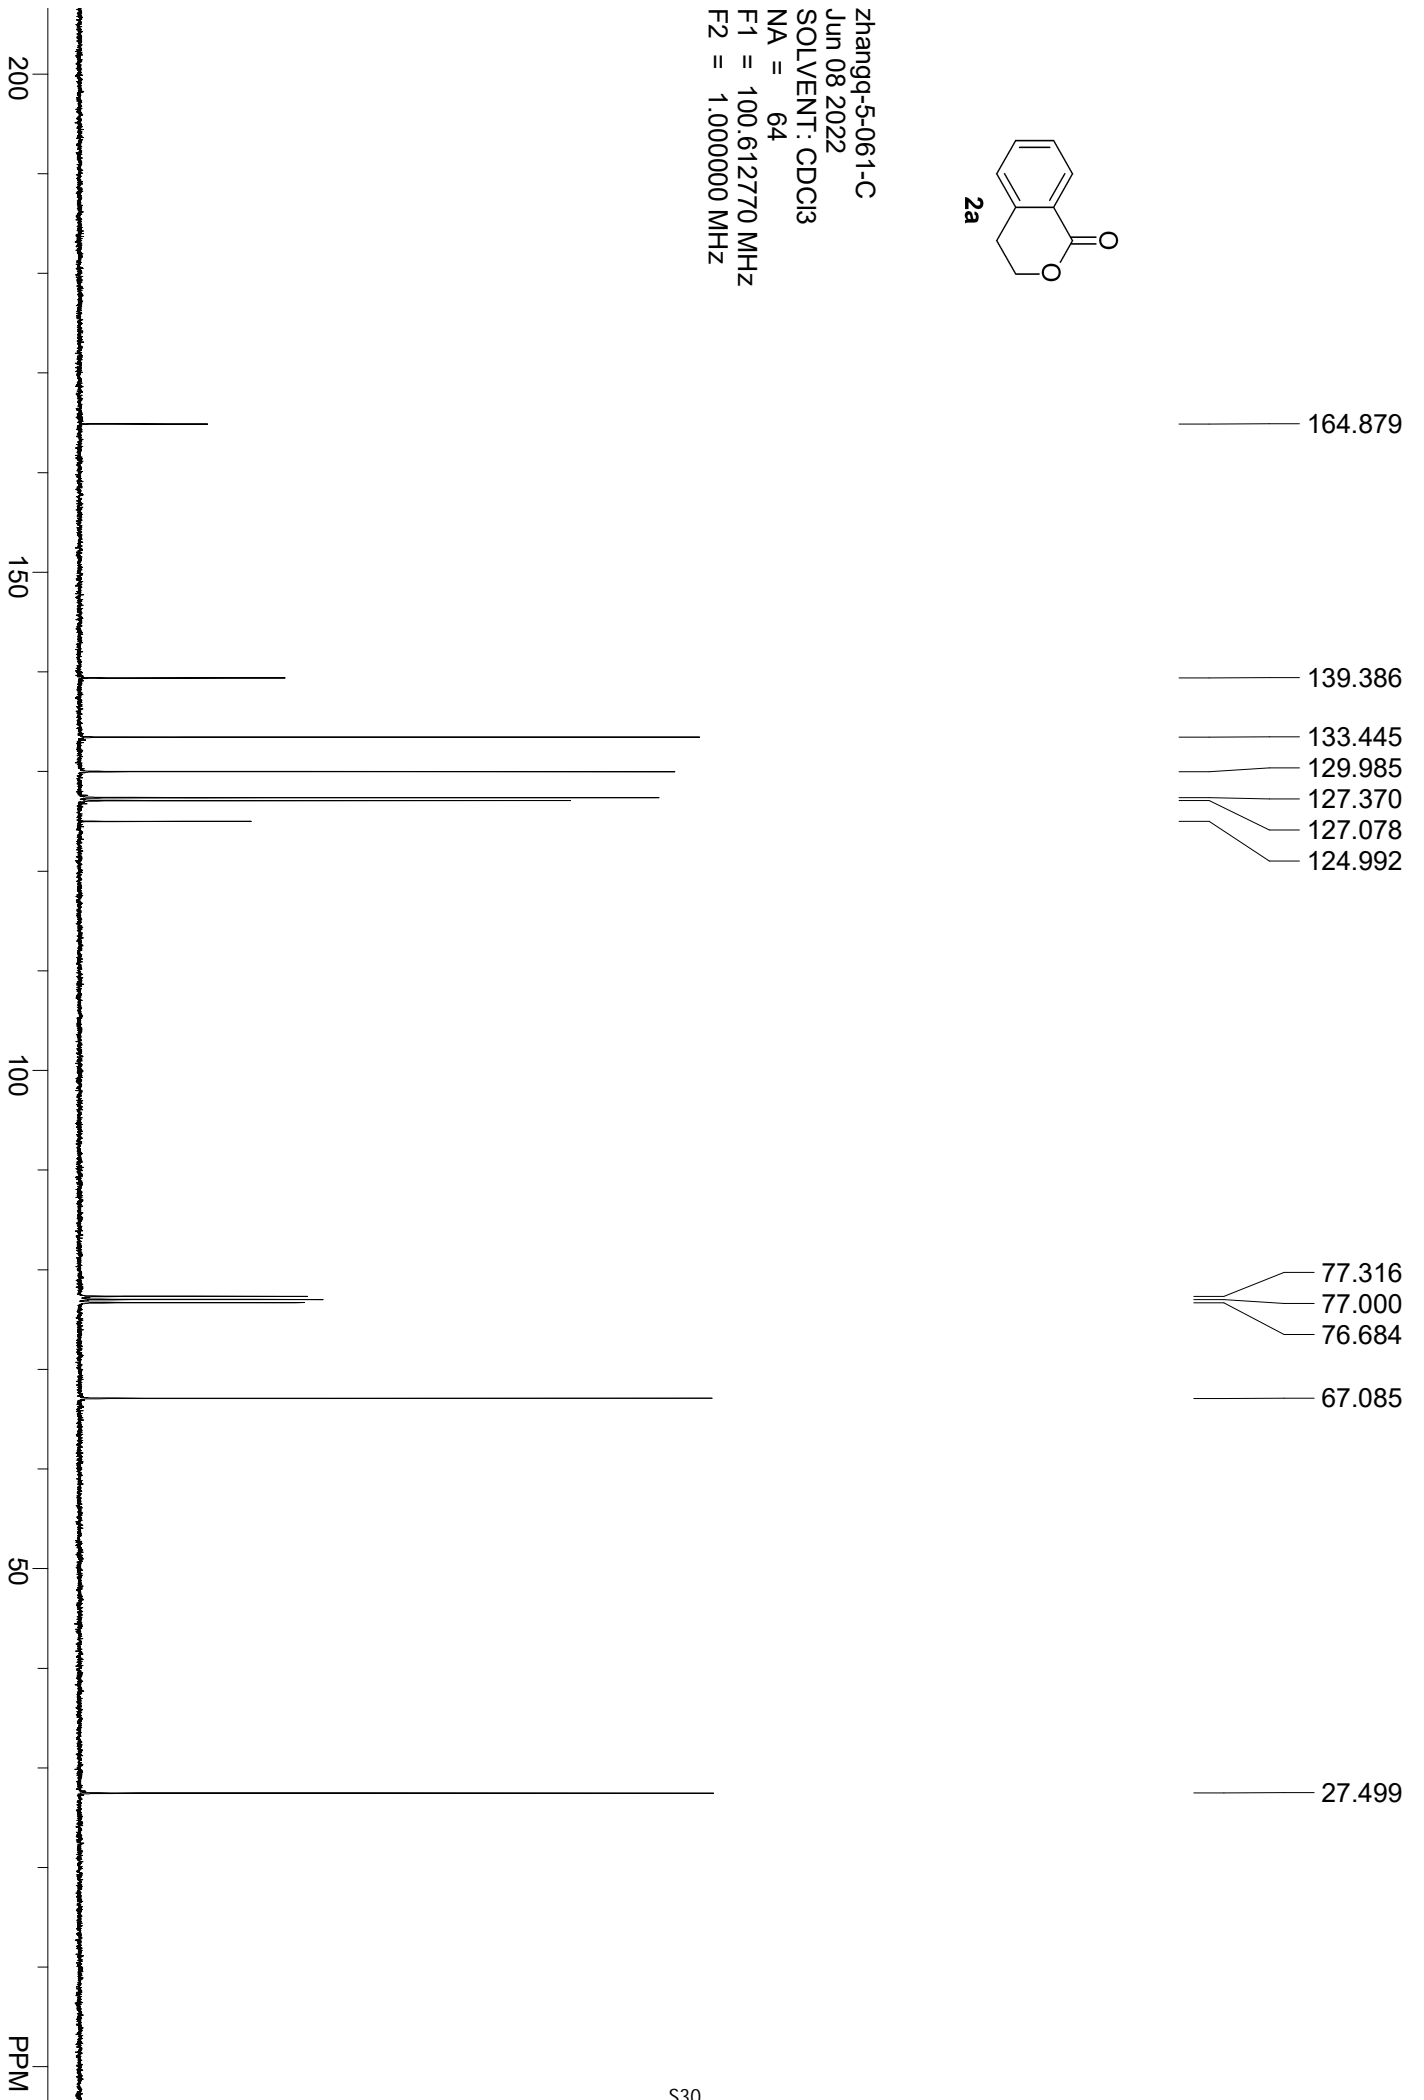

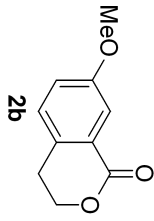

Zhangq-3-186-H  
Jul 15 2021  
SOLVENT: CDCl3  
NA = 4  
F1 = 400.130005 MHz  
F2 = 1.000000 MHz

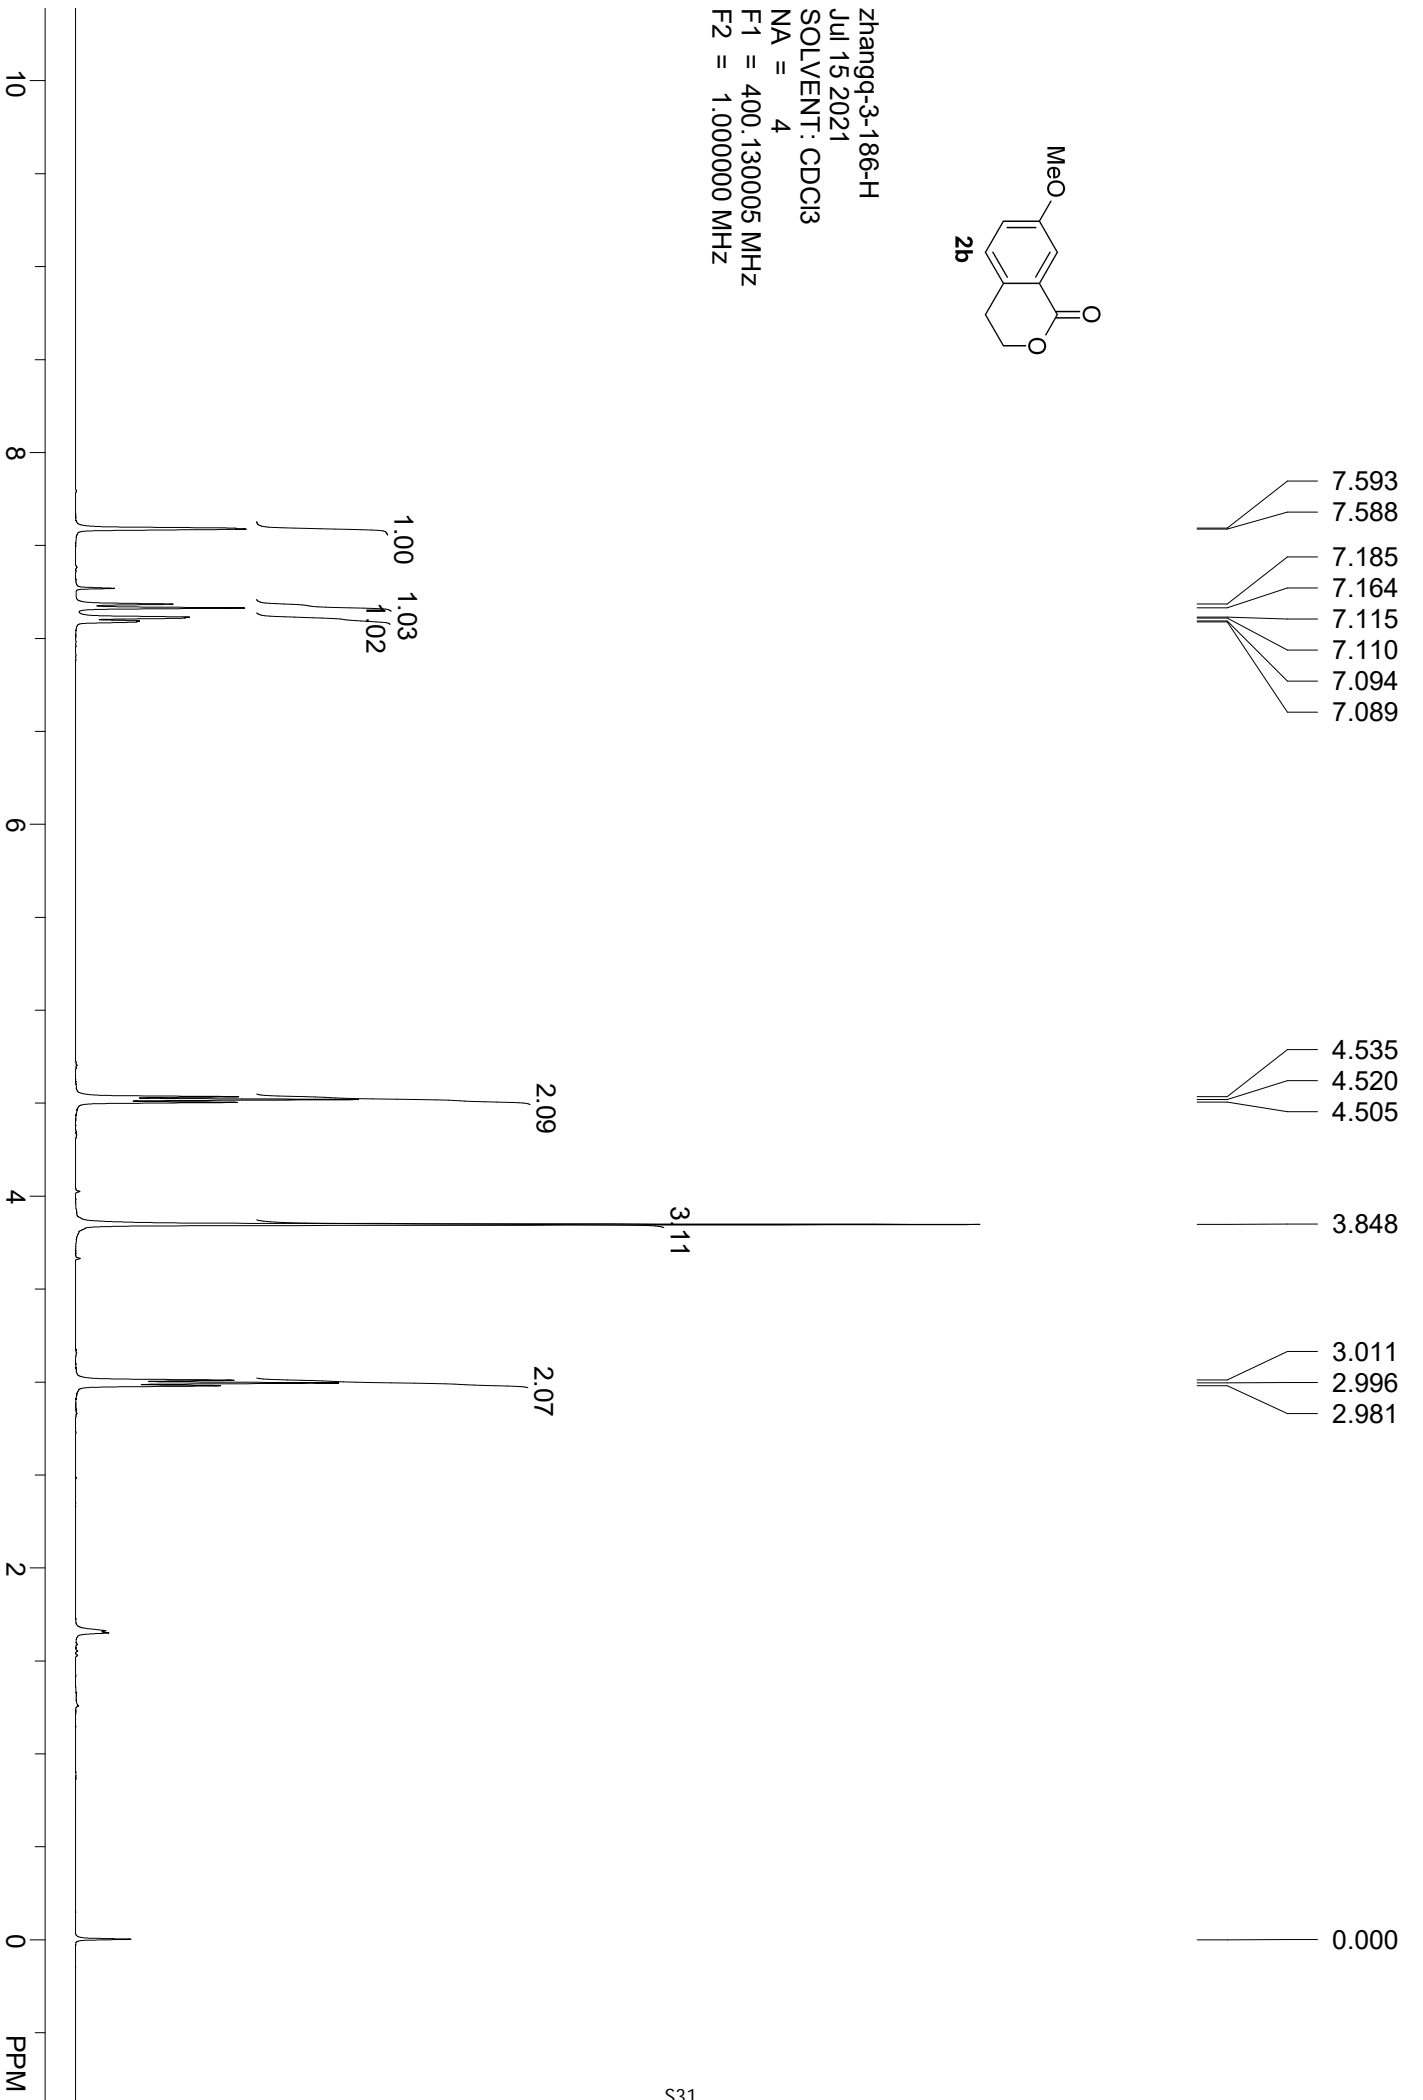

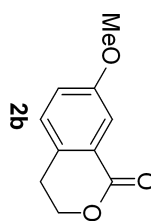

Zhangq-3-186-C  
Jul 15 2021  
SOLVENT: CDCl3  
NA = 150  
F1 = 100.612770 MHz  
F2 = 1.000000 MHz

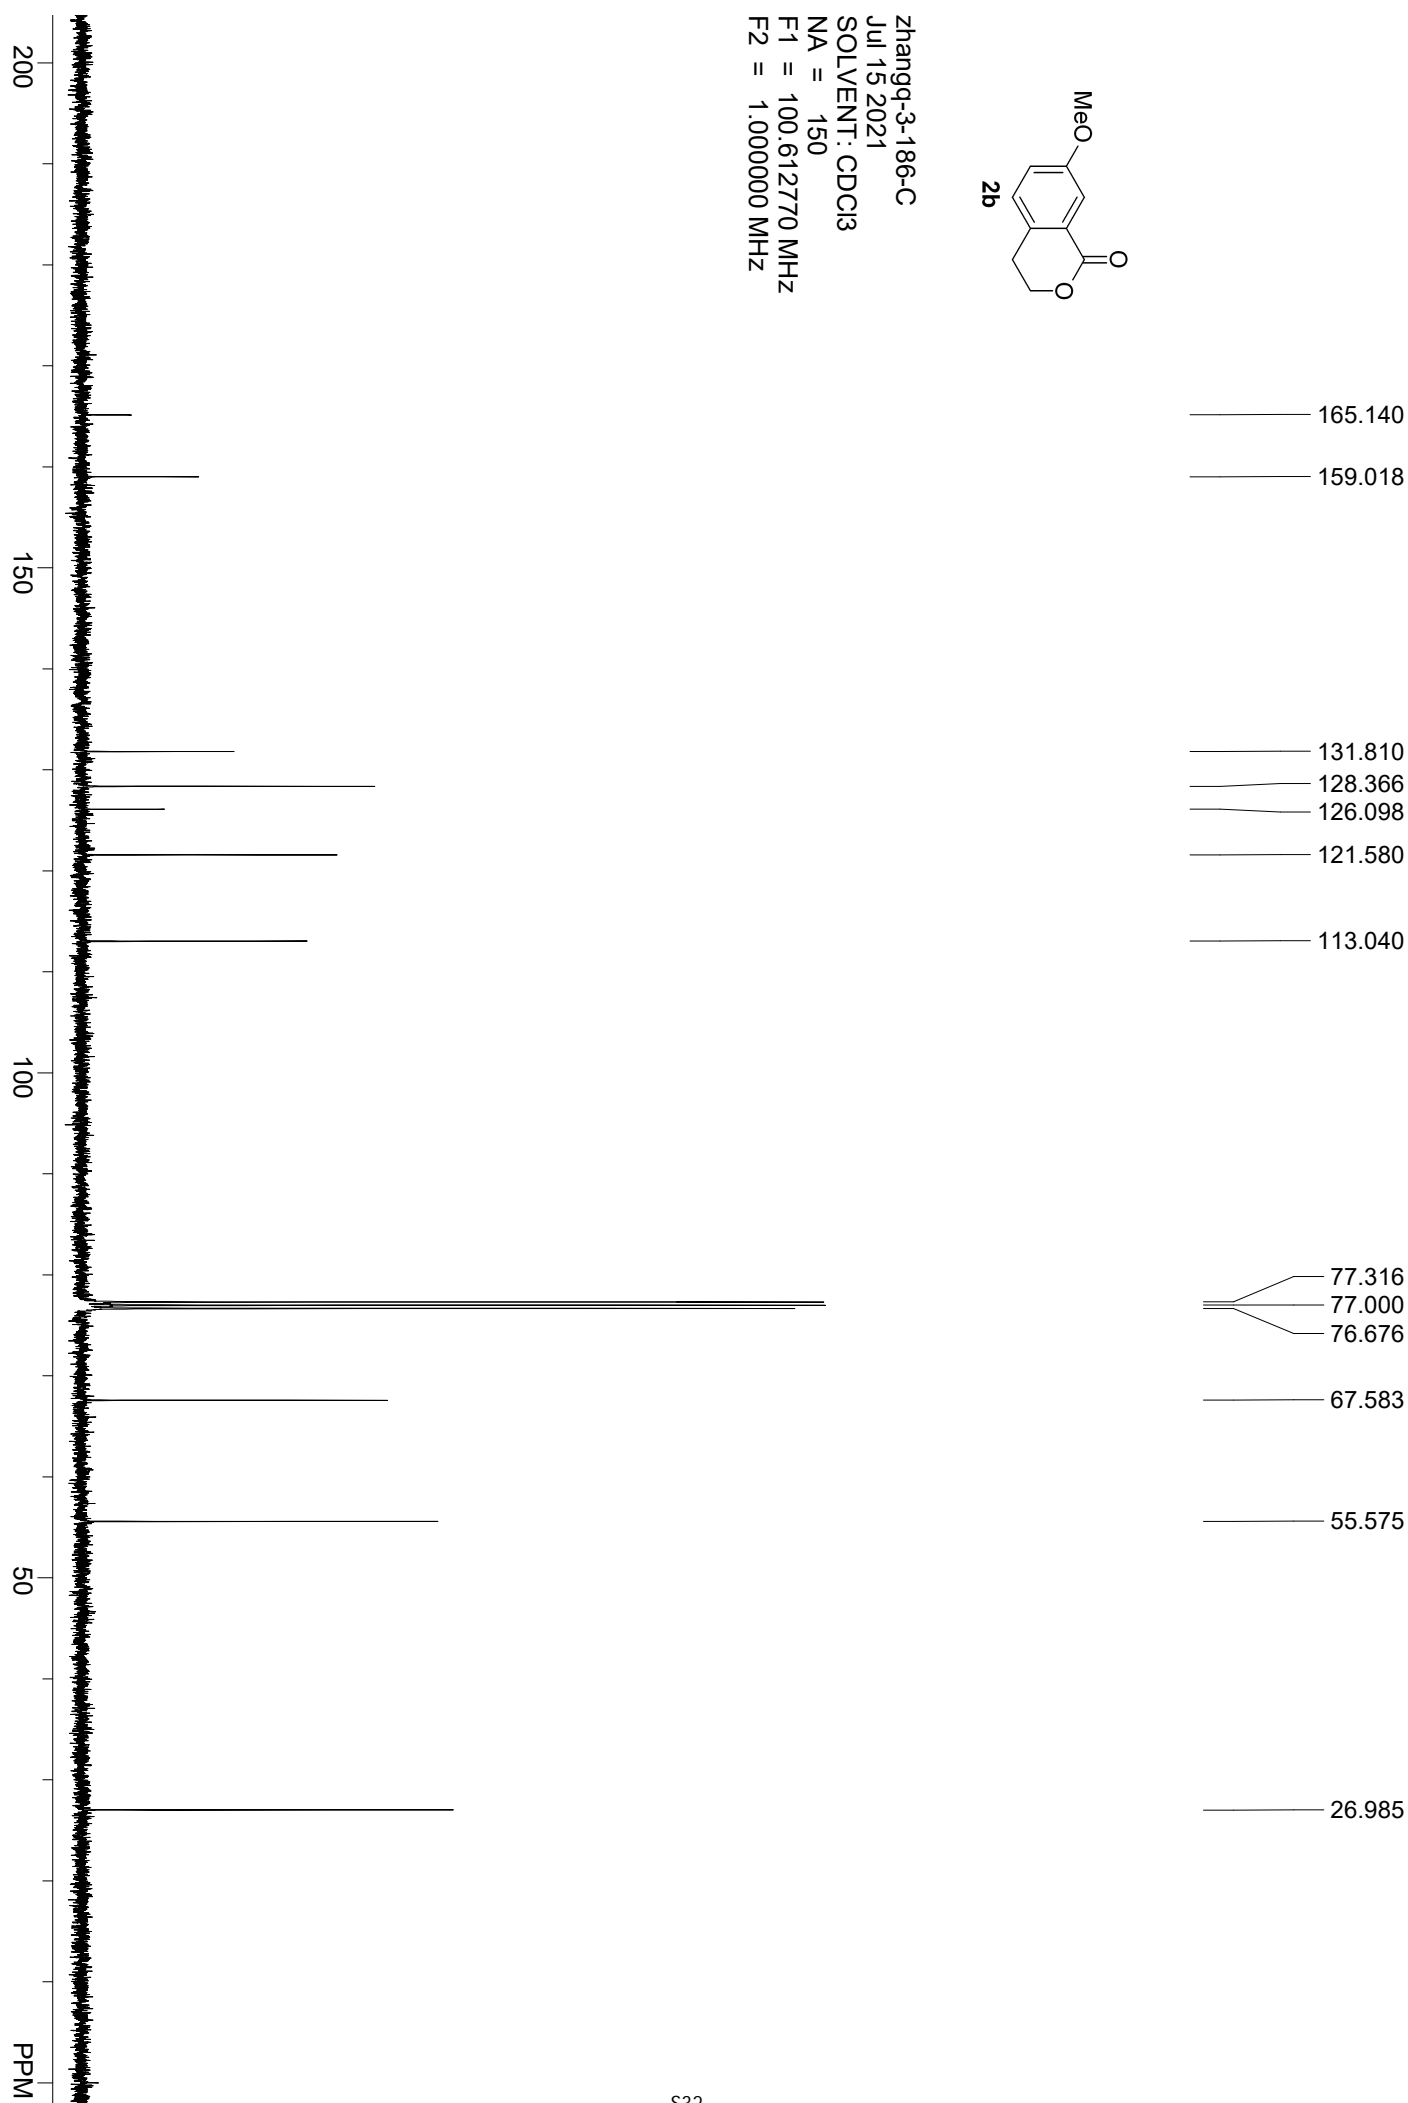



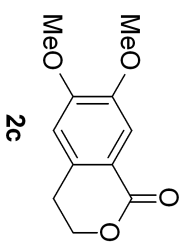

Zhangq-4-058-H  
Oct 13 2021  
SOLVENT: CDCl3  
NA = 4  
F1 = 400.130005 MHz  
F2 = 1.000000 MHz

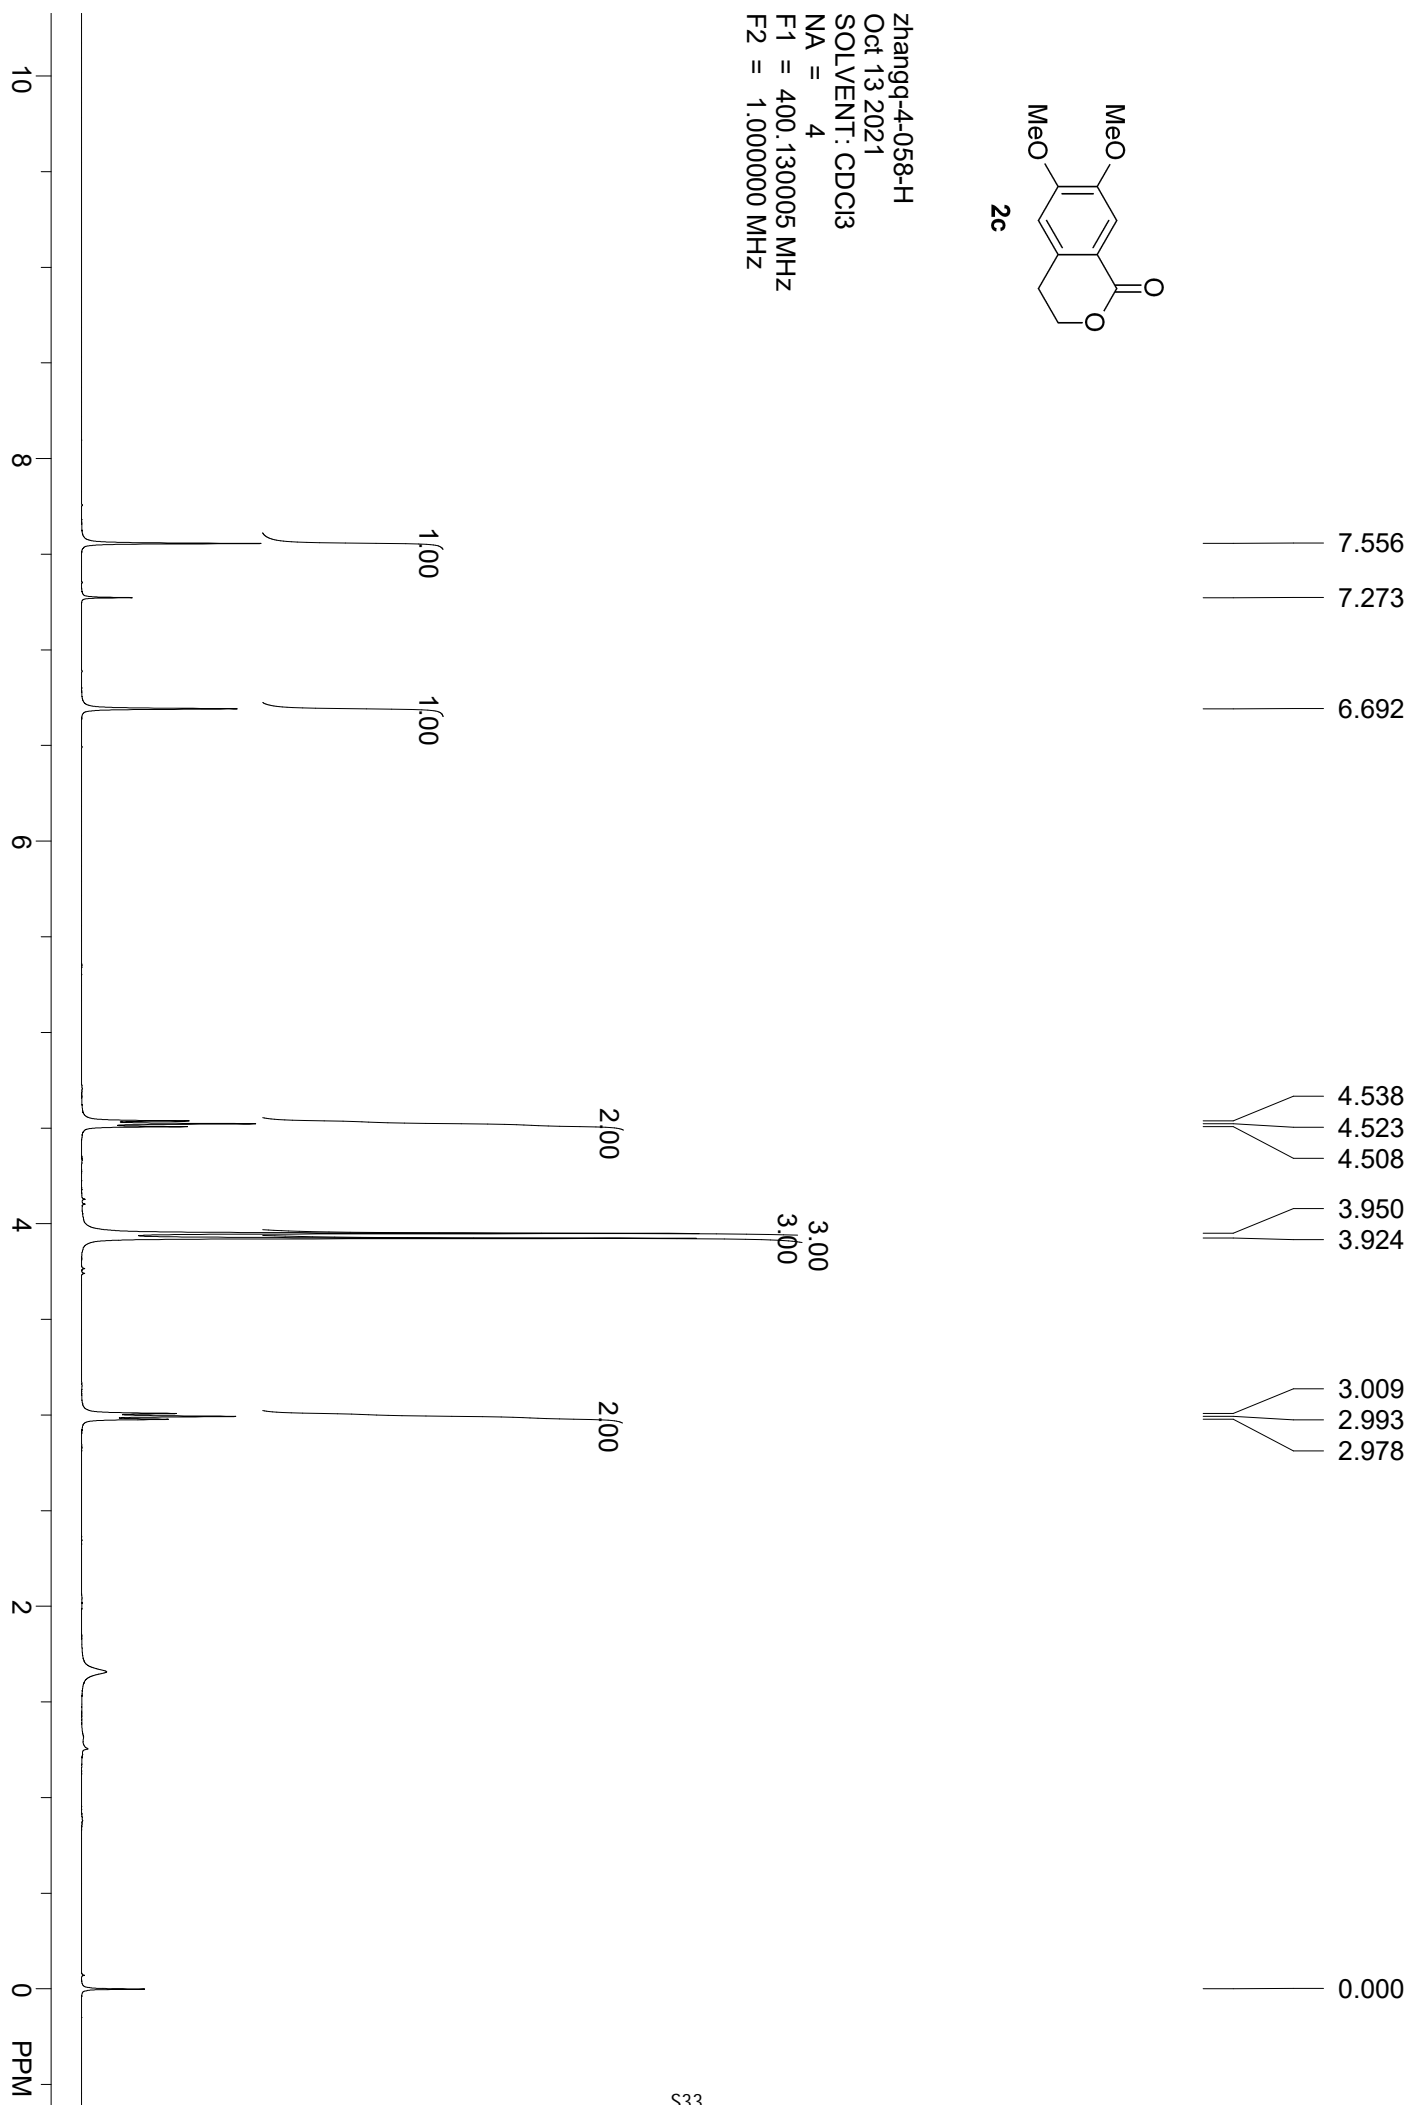

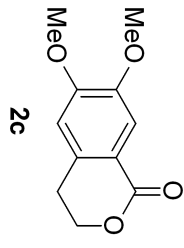

zhangq-4-058-C  
Oct 17 2021  
SOLVENT: CDCl3  
NA = 200  
F1 = 100.612770 MHz  
F2 = 1.000000 MHz

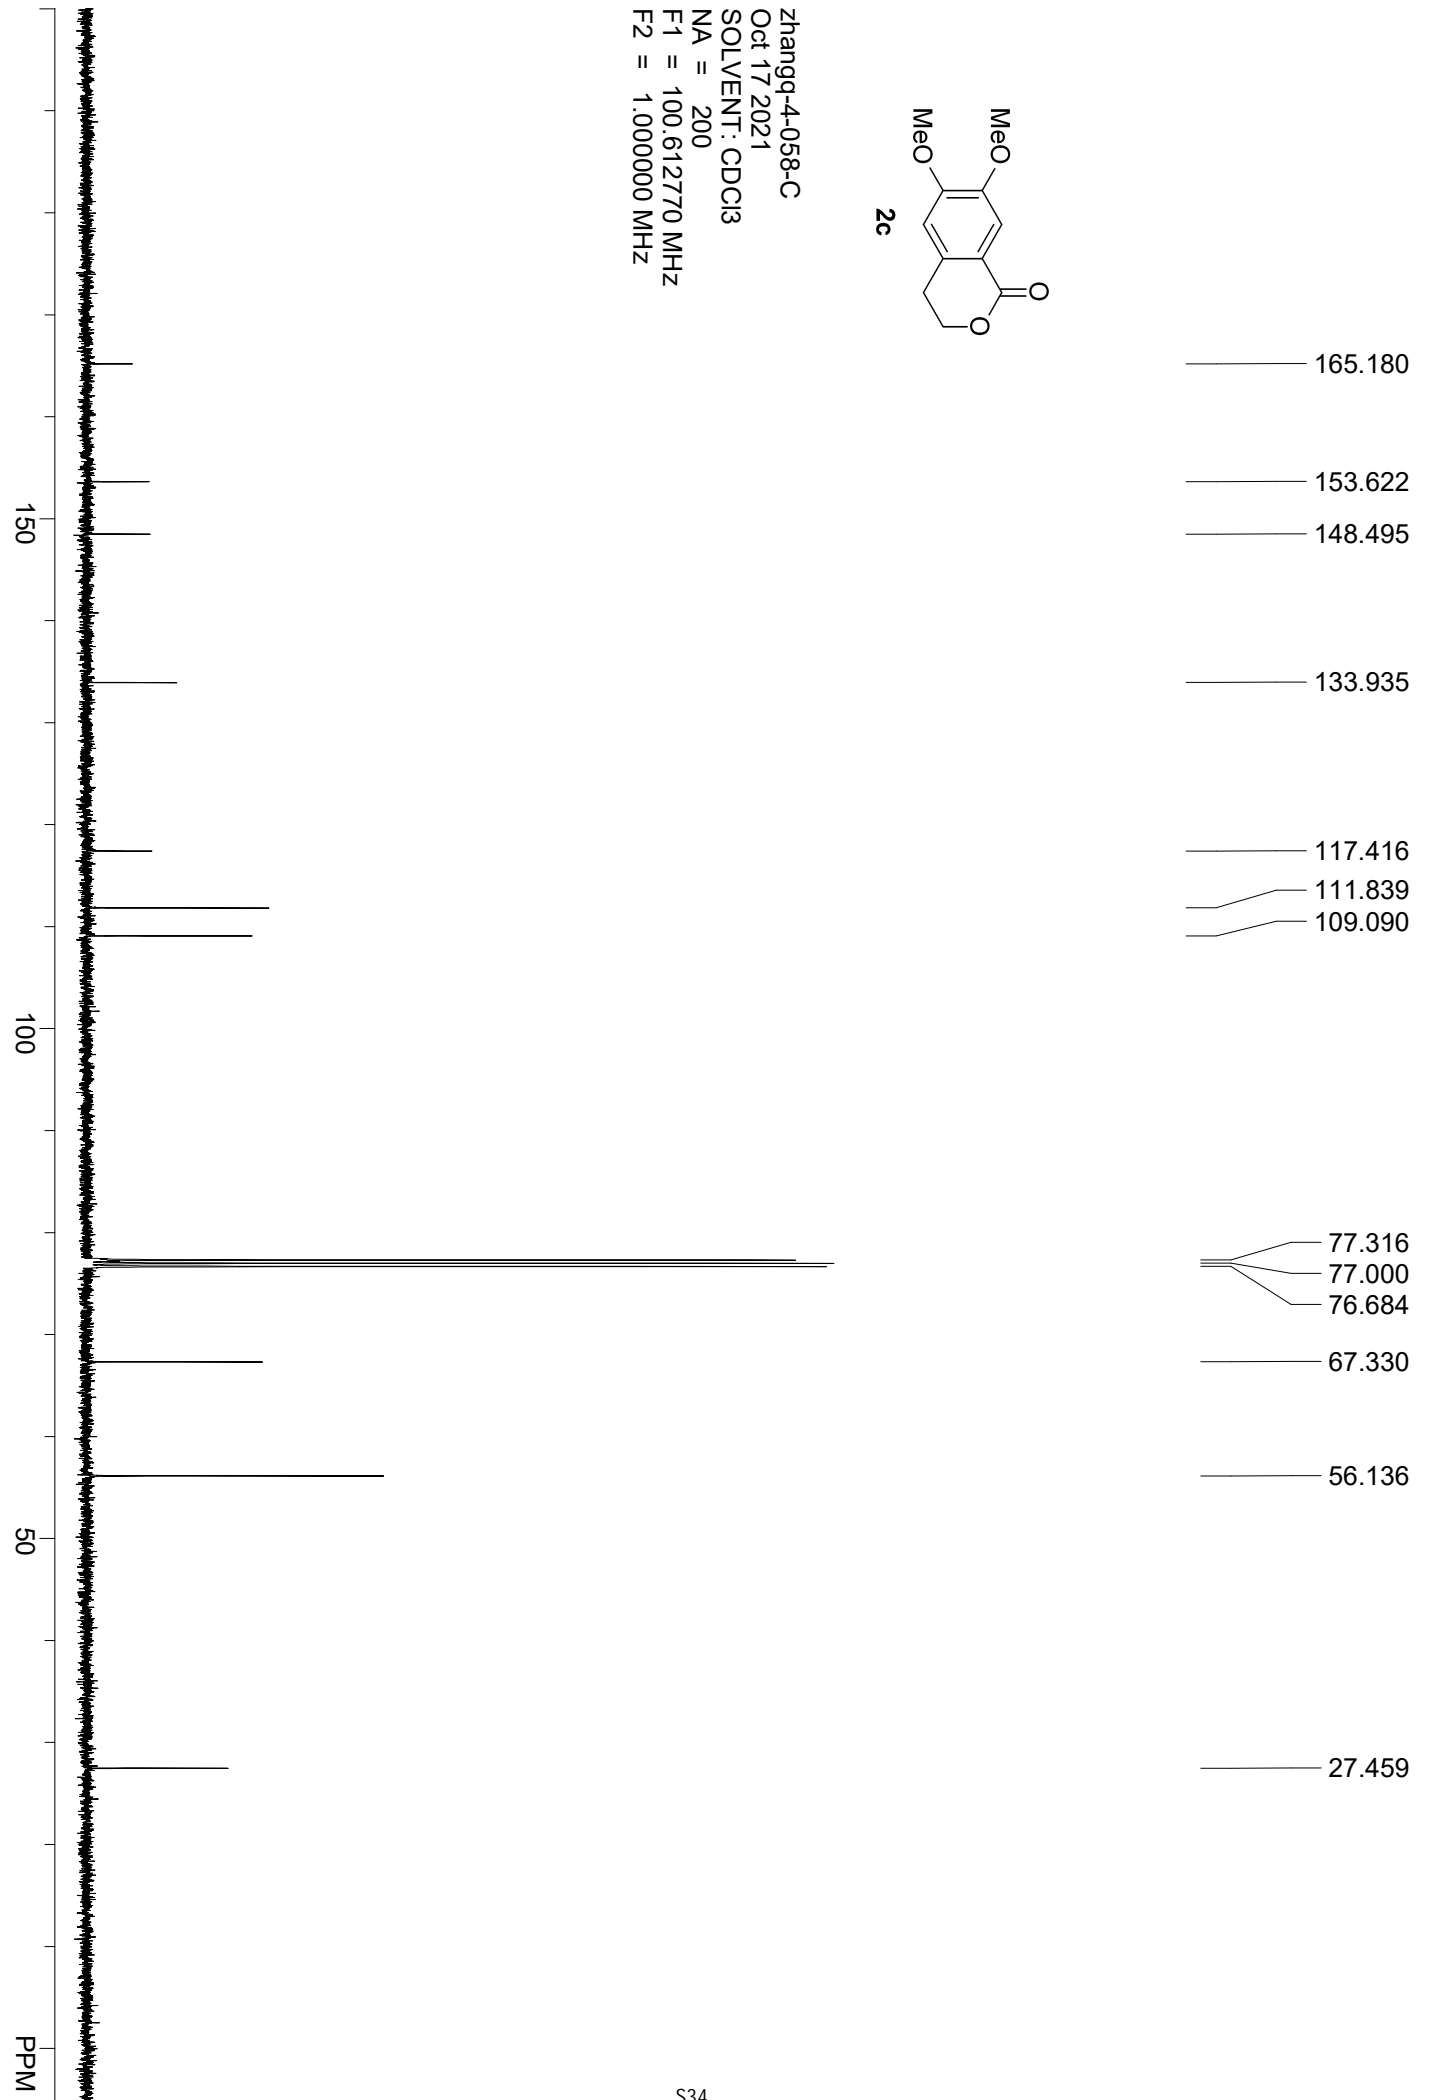

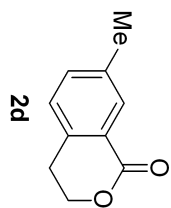

Zhangq-3-171-H  
Jul 05 2021  
SOLVENT: CDCl3  
F1 = 400.130005 MHz  
F2 = 1.000000 MHz

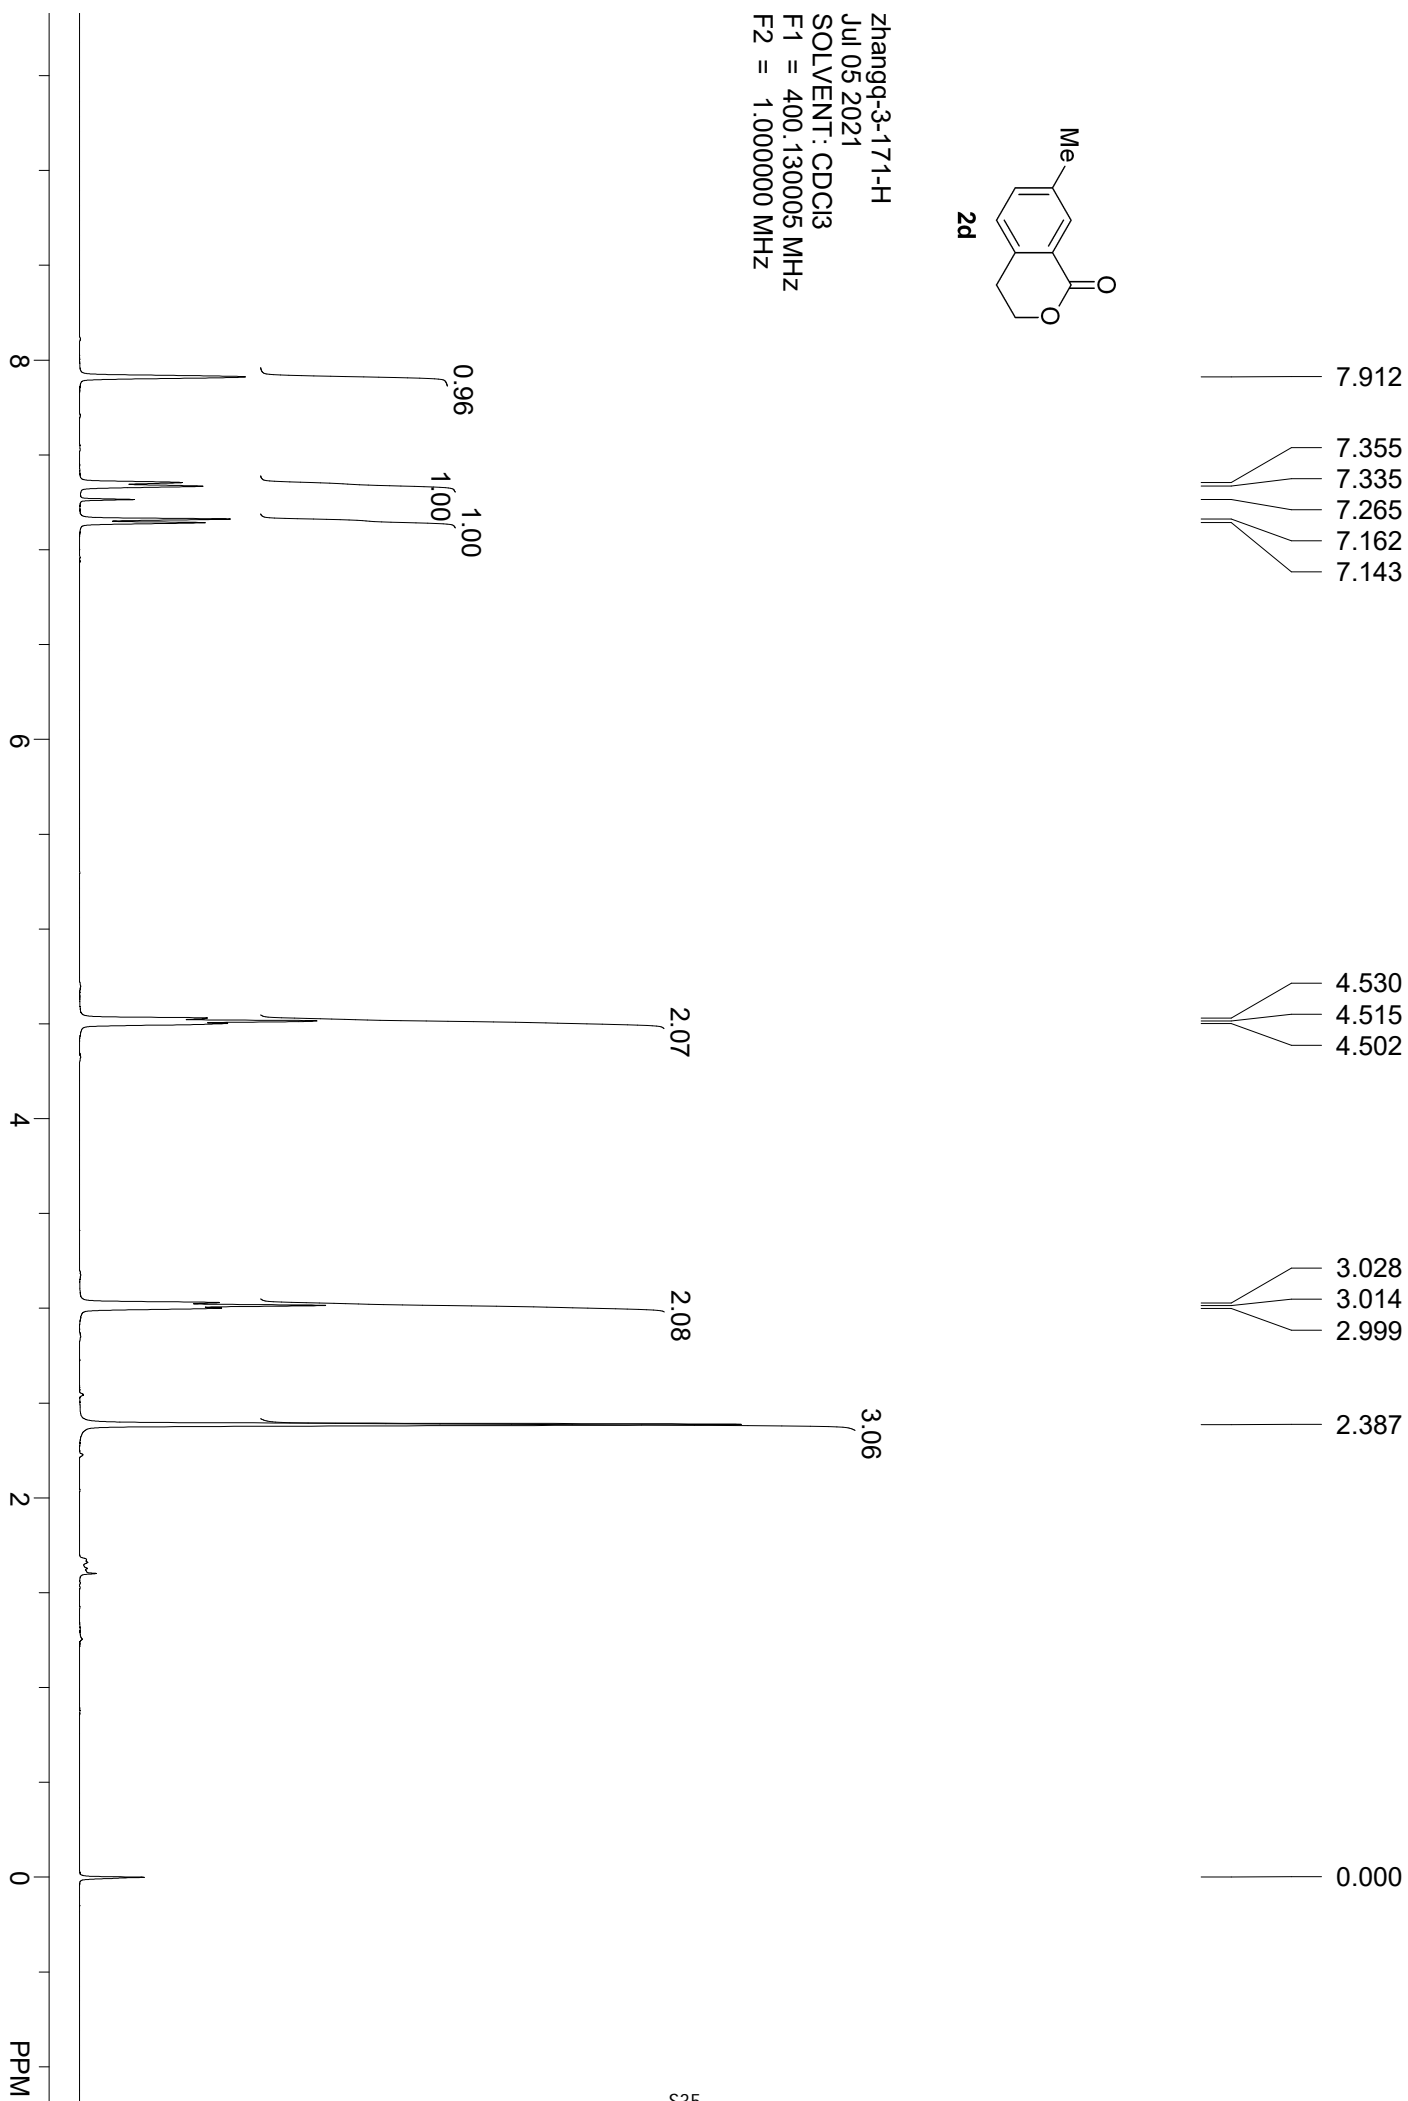

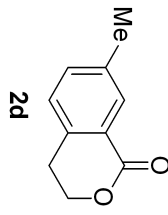

zhangq-3-171-C  
Jul 15 2022  
SOLVENT: CDCl3  
NA = 100  
F1 = 100.612770 MHz  
F2 = 1.000000 MHz

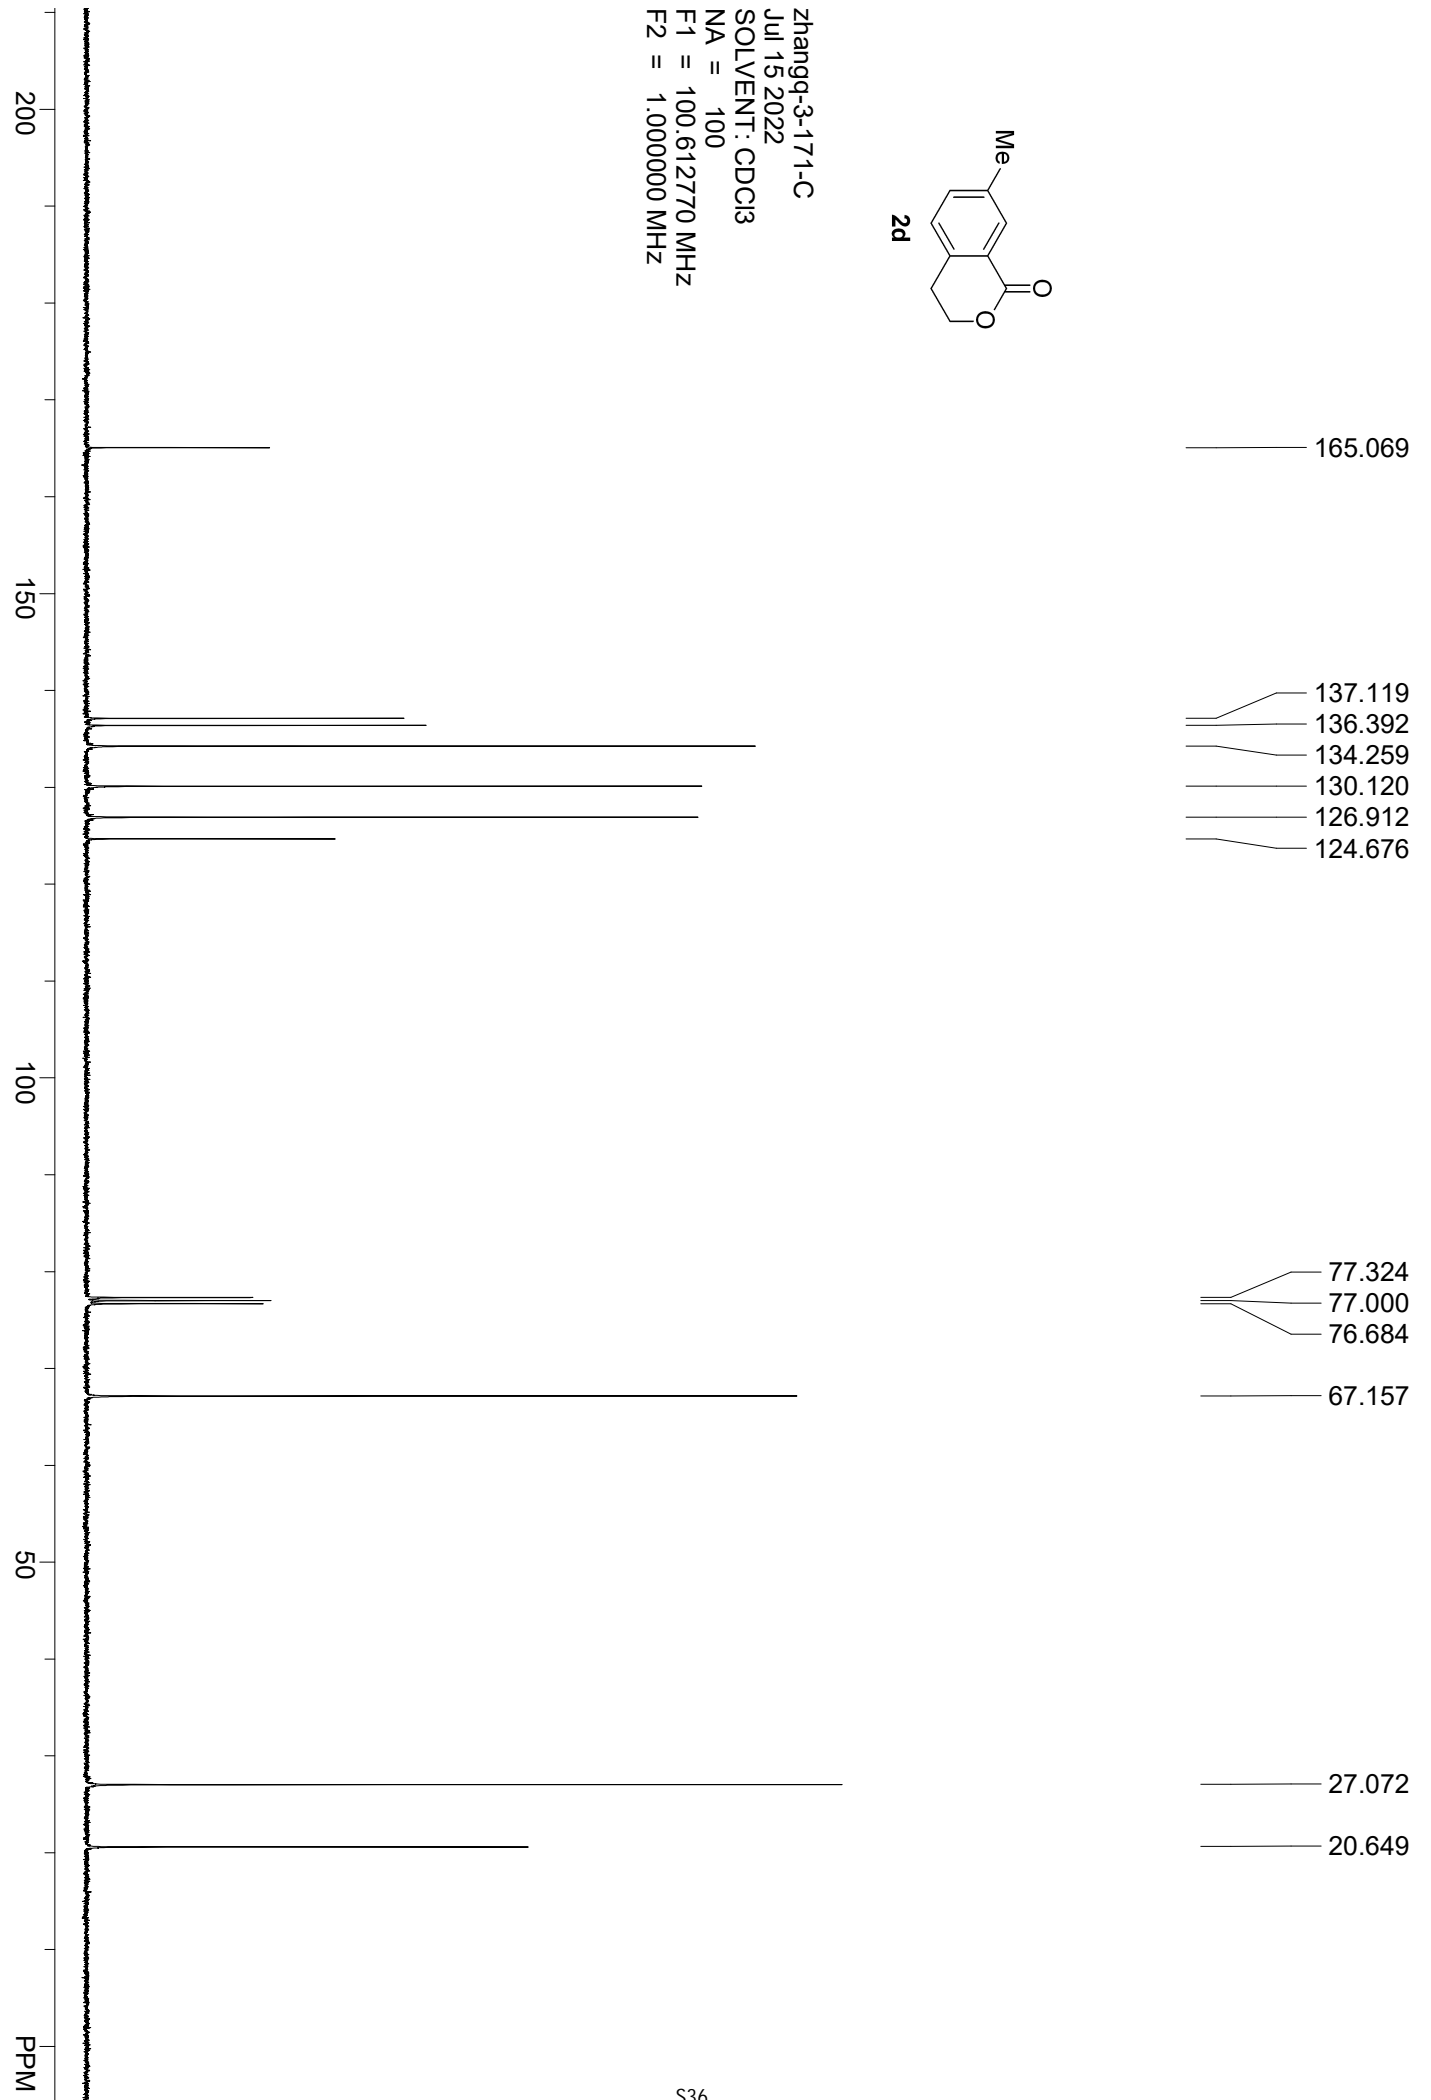

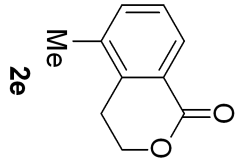

zhangg-4-044-H  
Sep 27 2021  
SOLVENT: CDCl3  
NA = 4  
F1 = 400.130005 MHz  
F2 = 1.000000 MHz

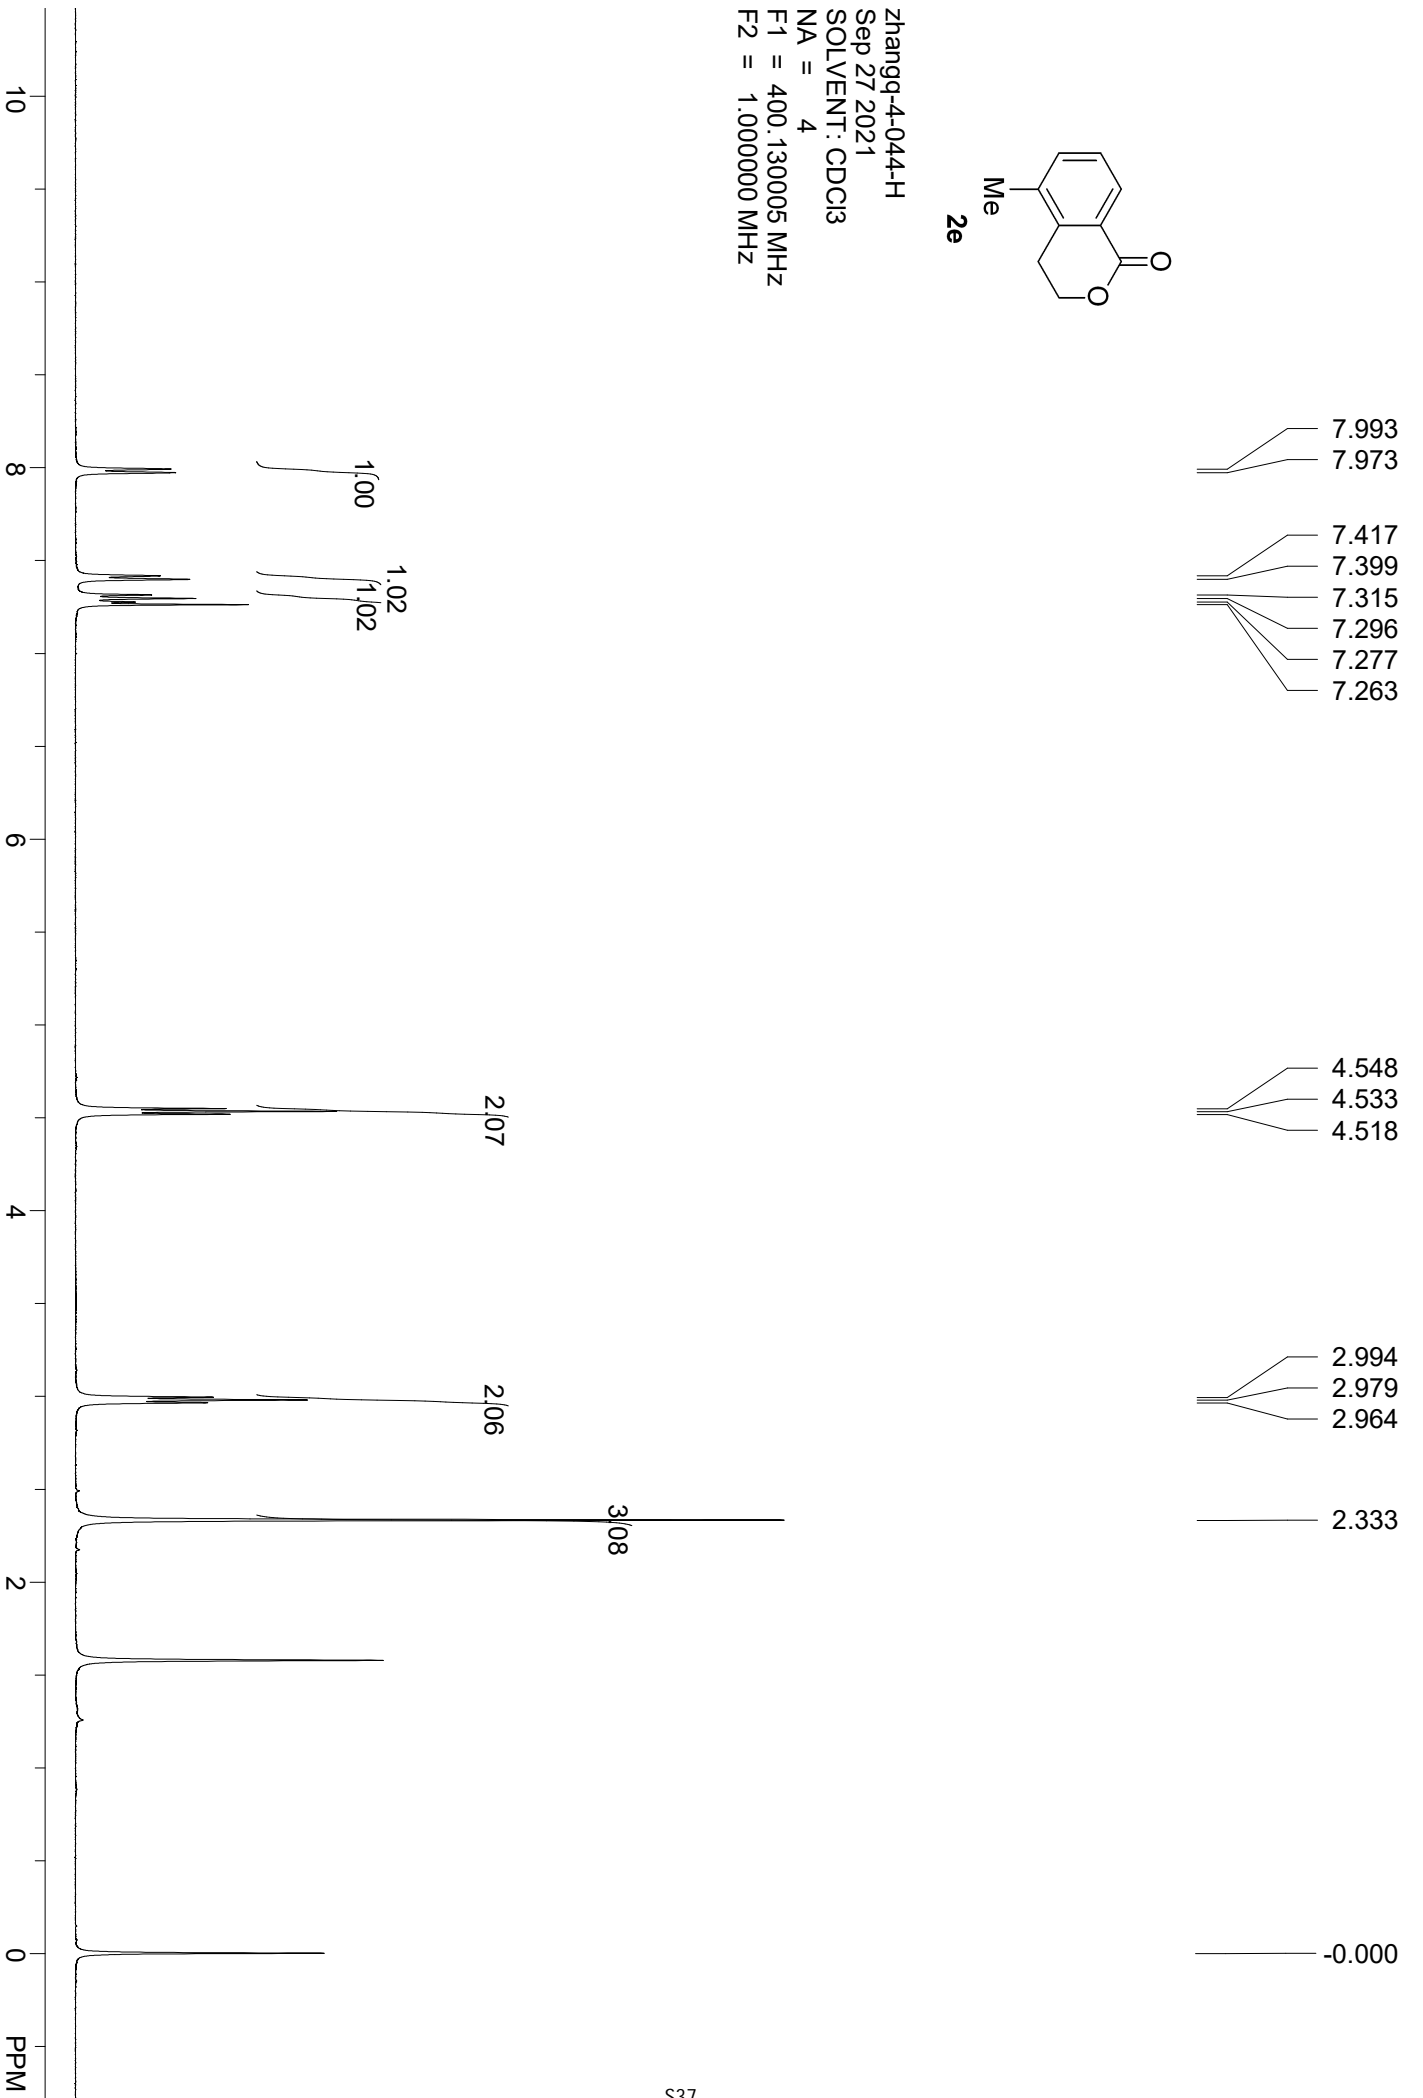

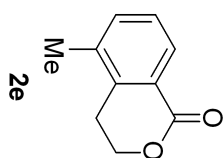

Zhangq-4-044-C  
Sep 27 2021  
SOLVENT: CDCl3  
NA = 64  
F1 = 100.612770 MHz  
F2 = 1.000000 MHz

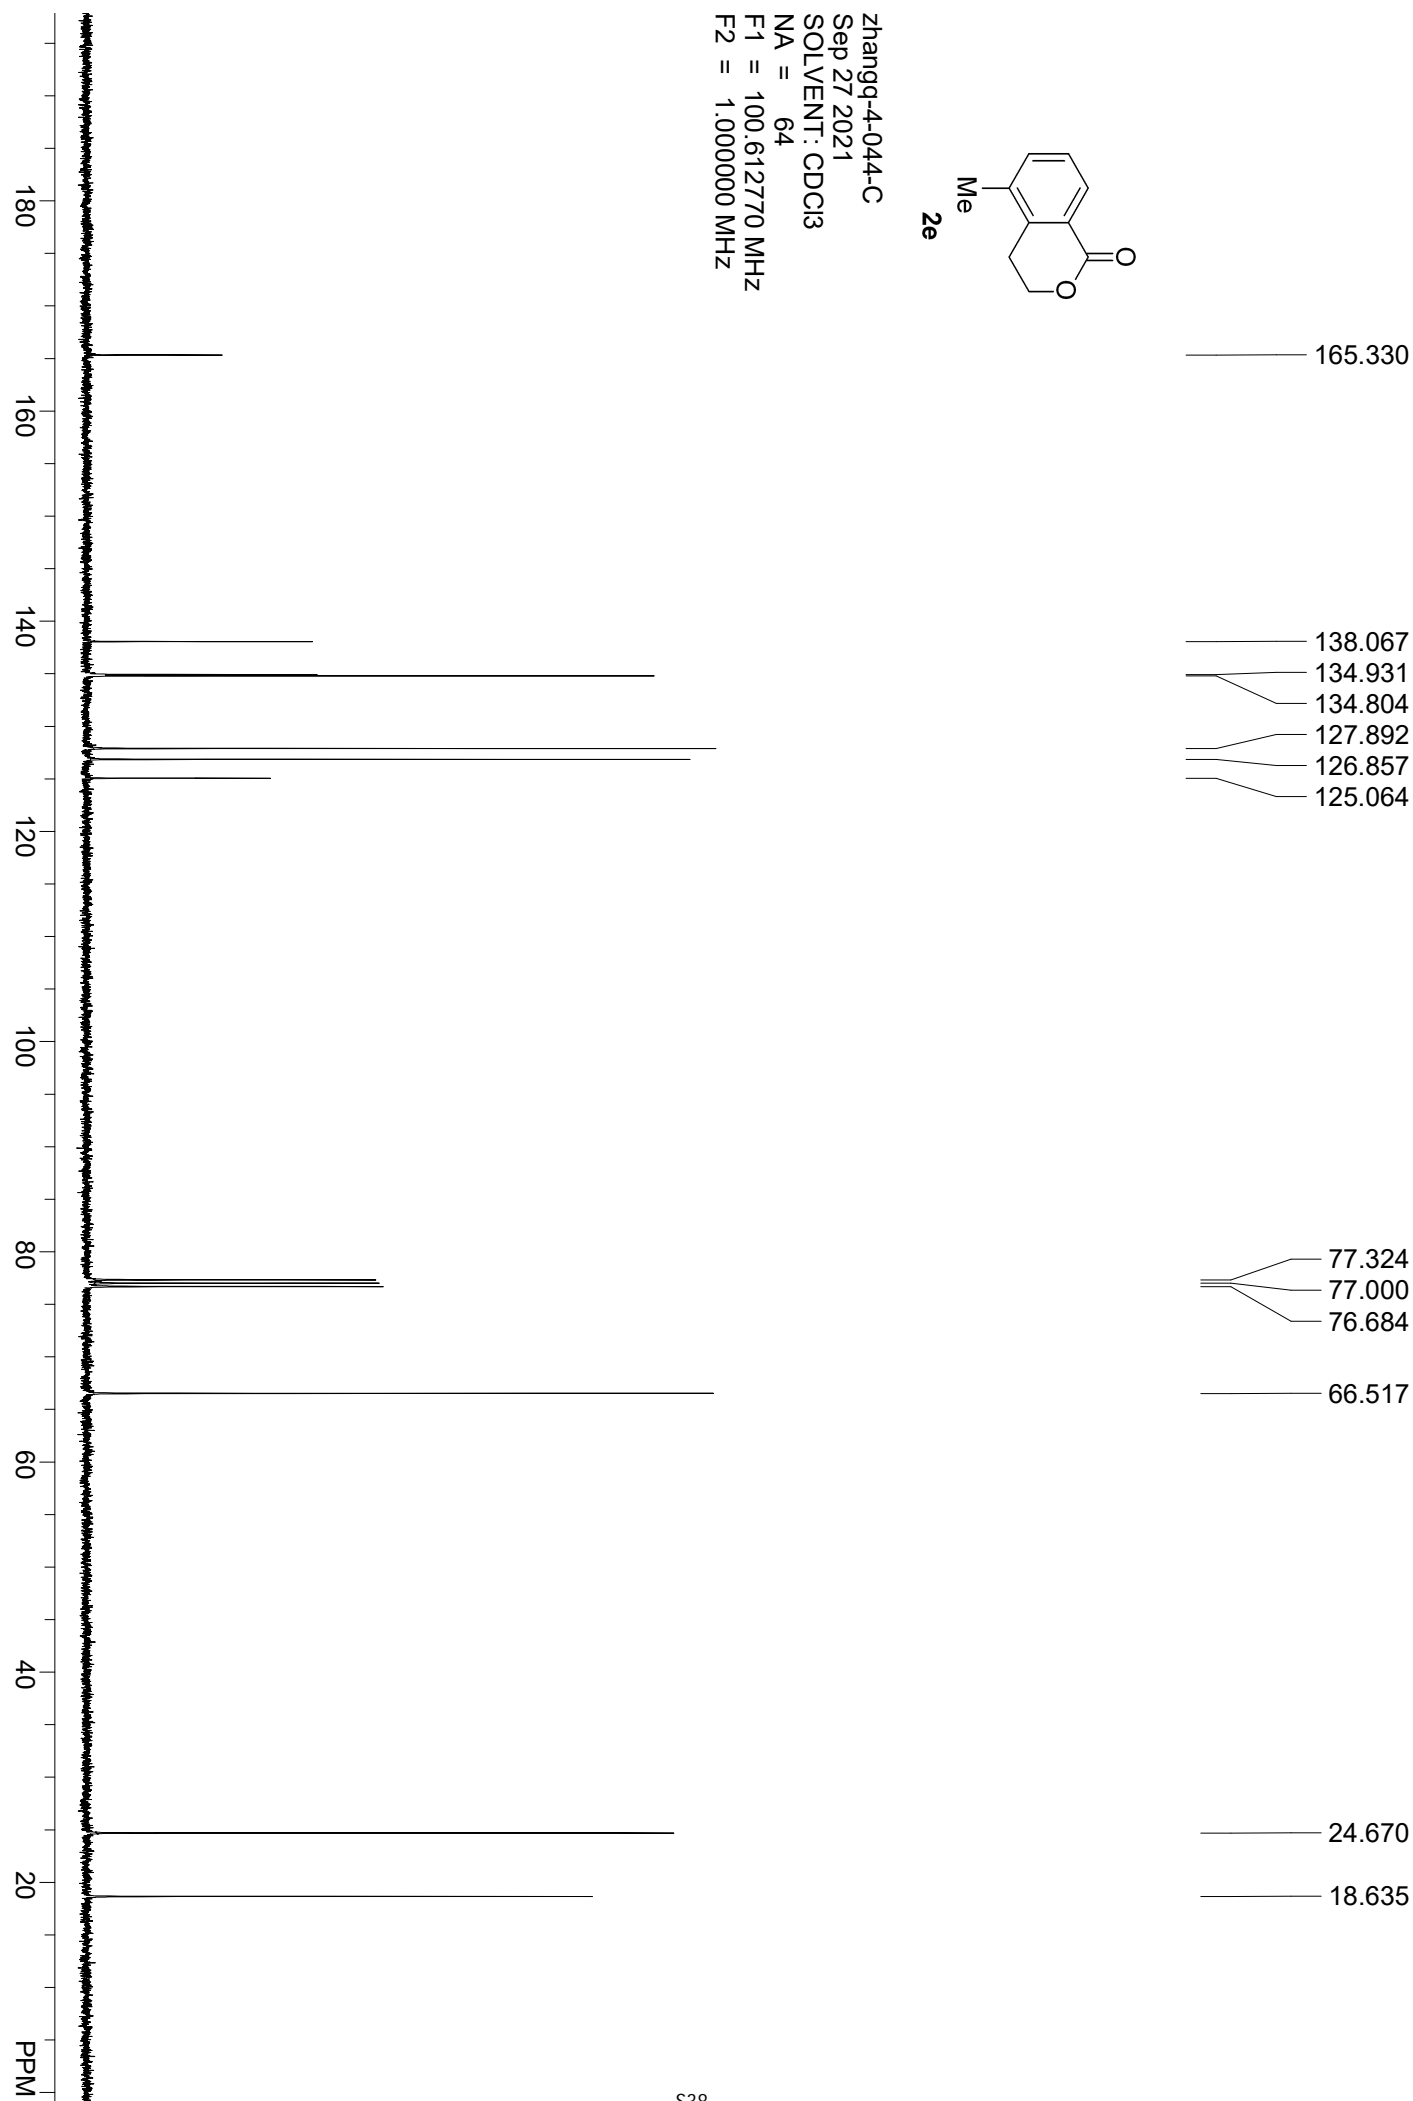

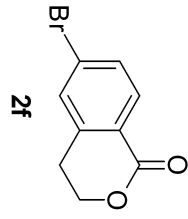

zhangq-4-120-re  
Dec 01 2021  
SOLVENT: CDCl3  
NA = 4  
F1 = 400.130005 MHz  
F2 = 1.000000 MHz

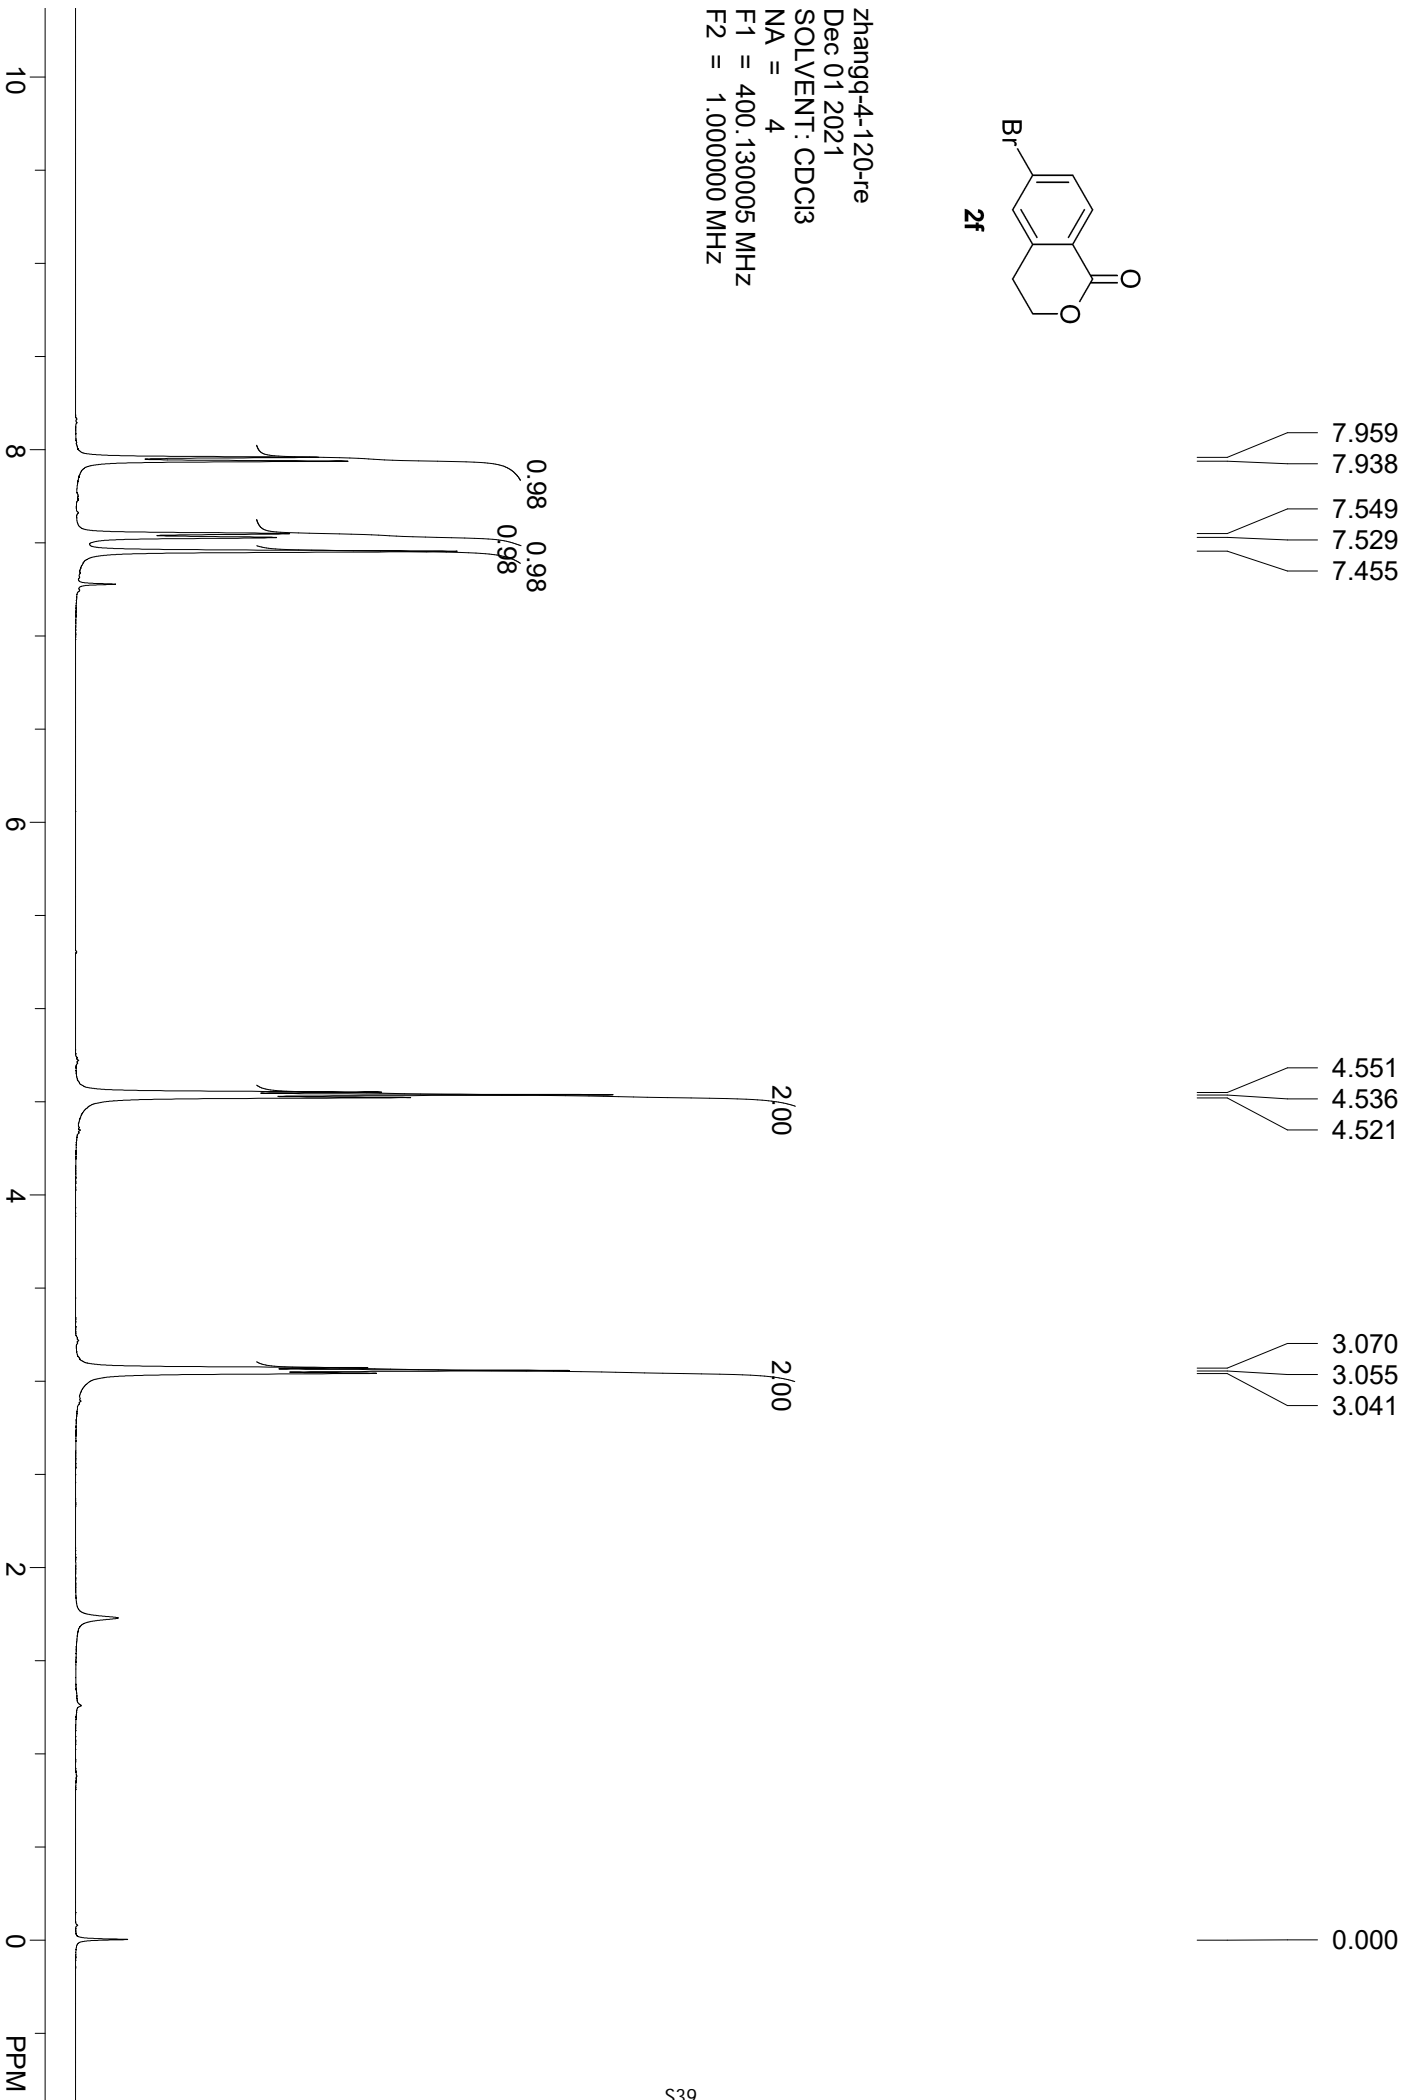

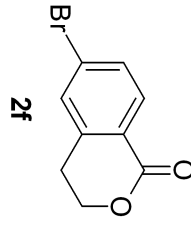

zhangq-4-120-C  
Nov 29 2021  
SOLVENT: CDCl3  
NA = 64  
F1 = 100.612770 MHz  
F2 = 1.000000 MHz

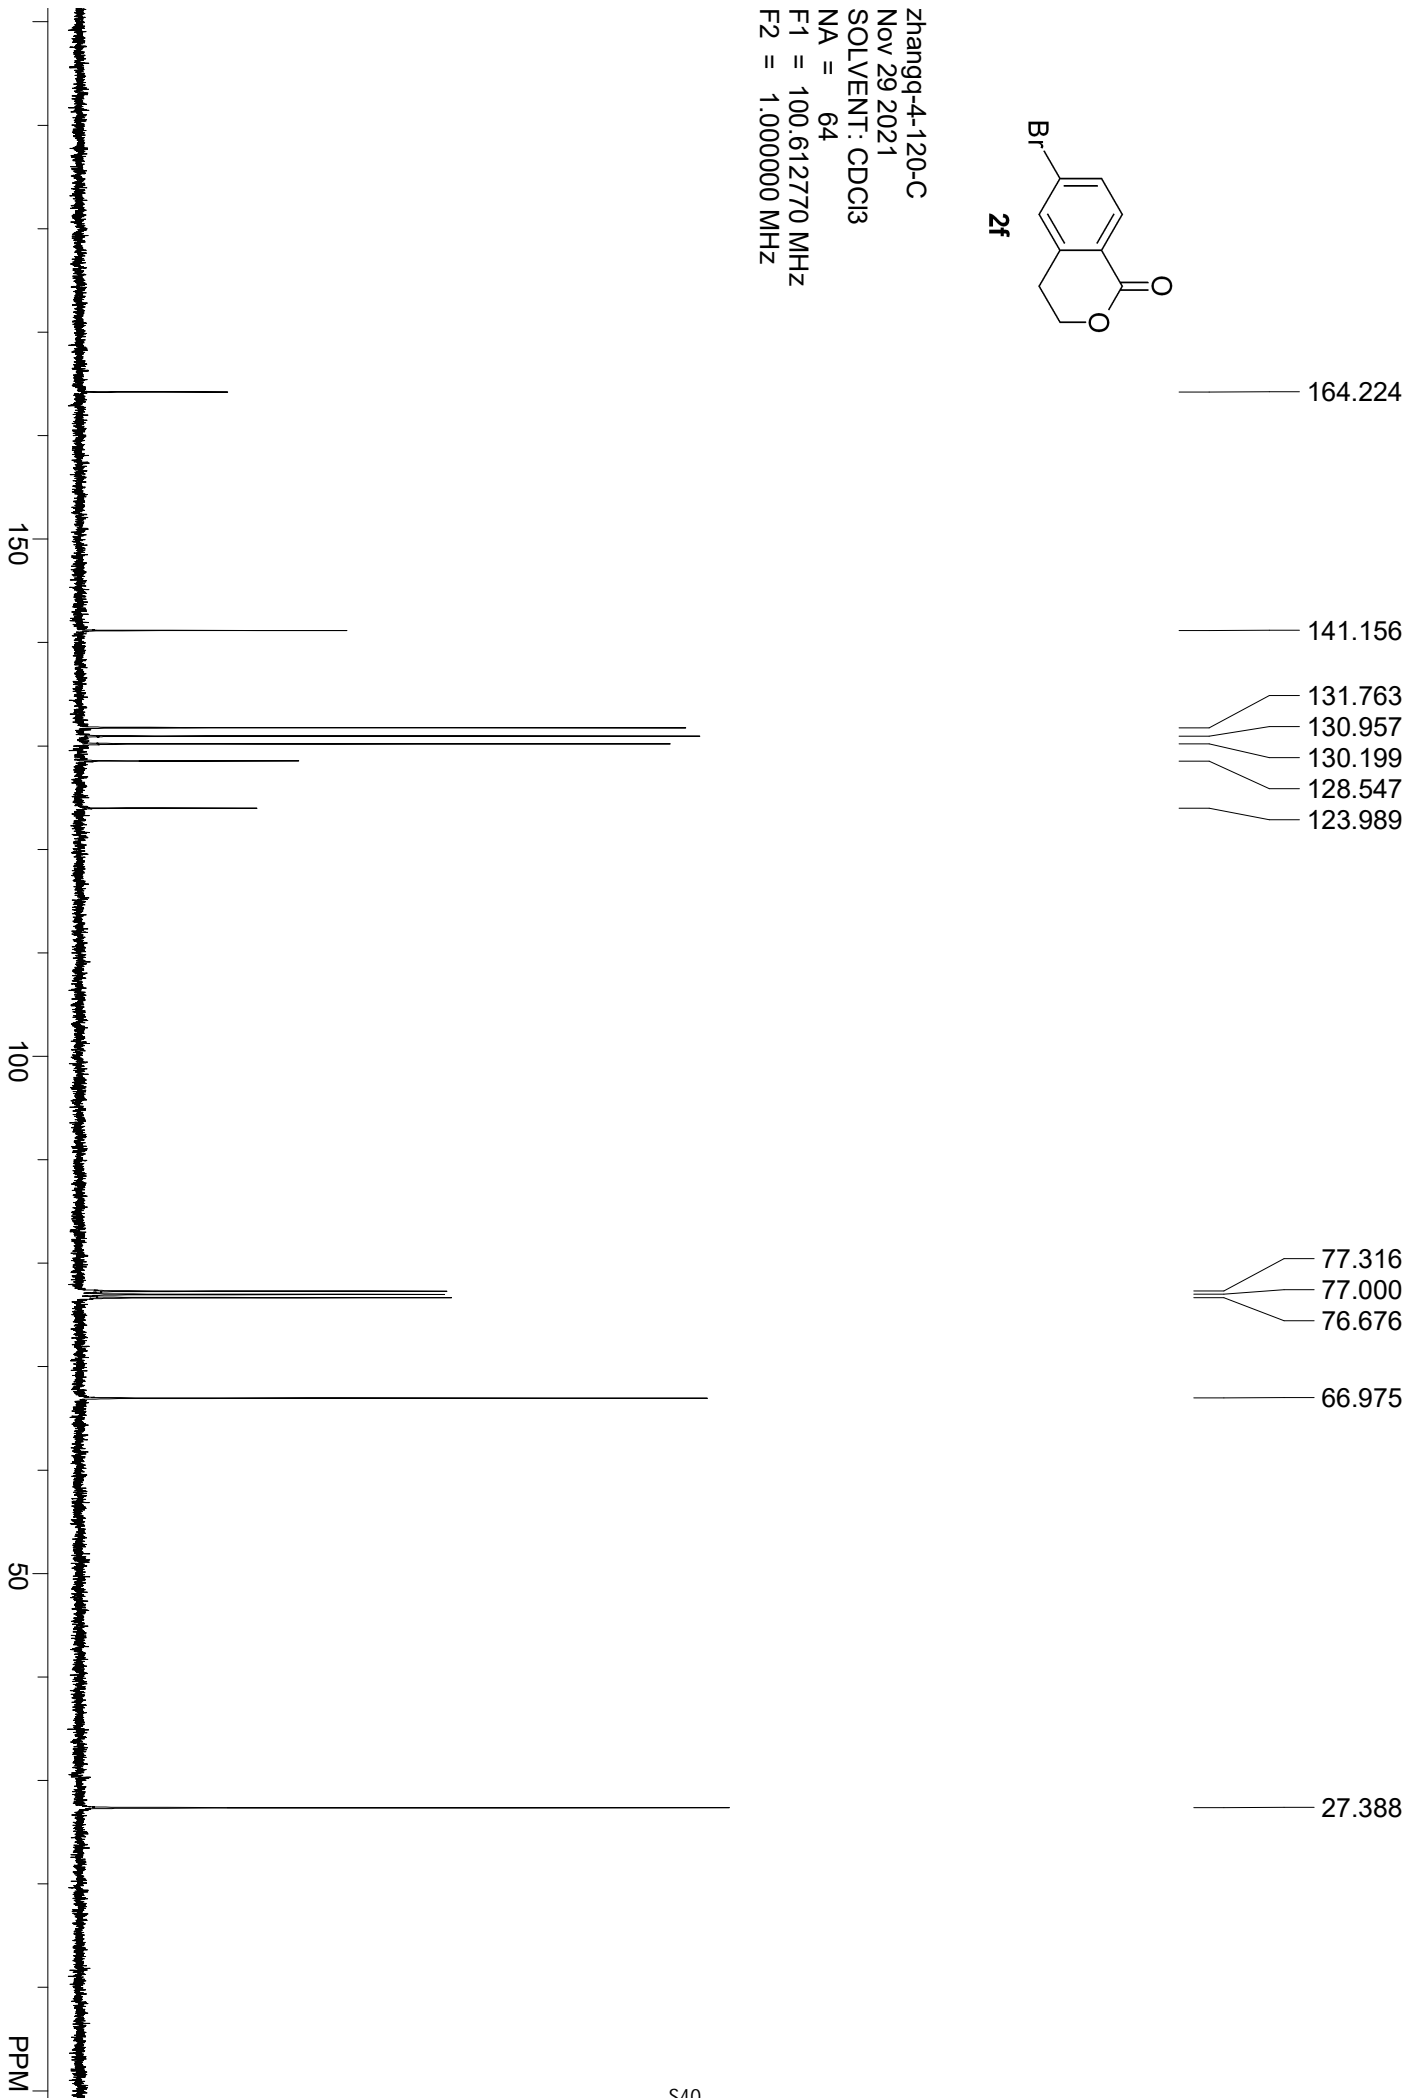



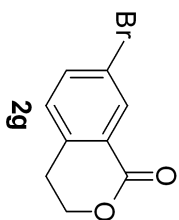

Zhangq-3-174-H  
Jul 08 2021  
SOLVENT: CDCl3  
NA = 4  
F1 = 400.130005 MHz  
F2 = 1.000000 MHz

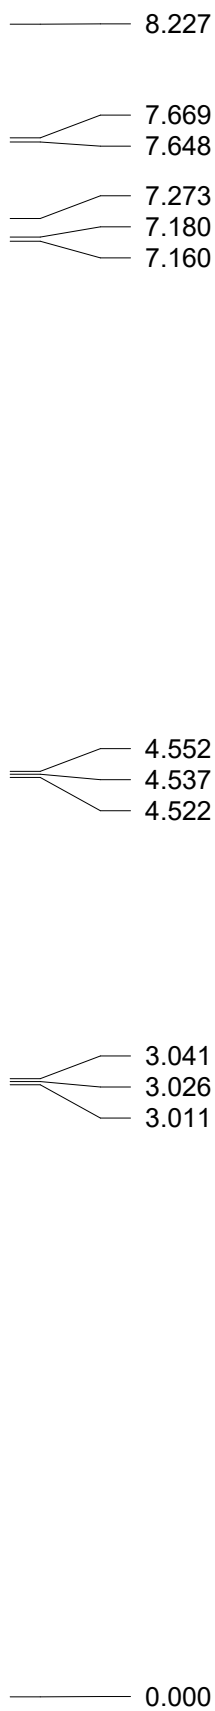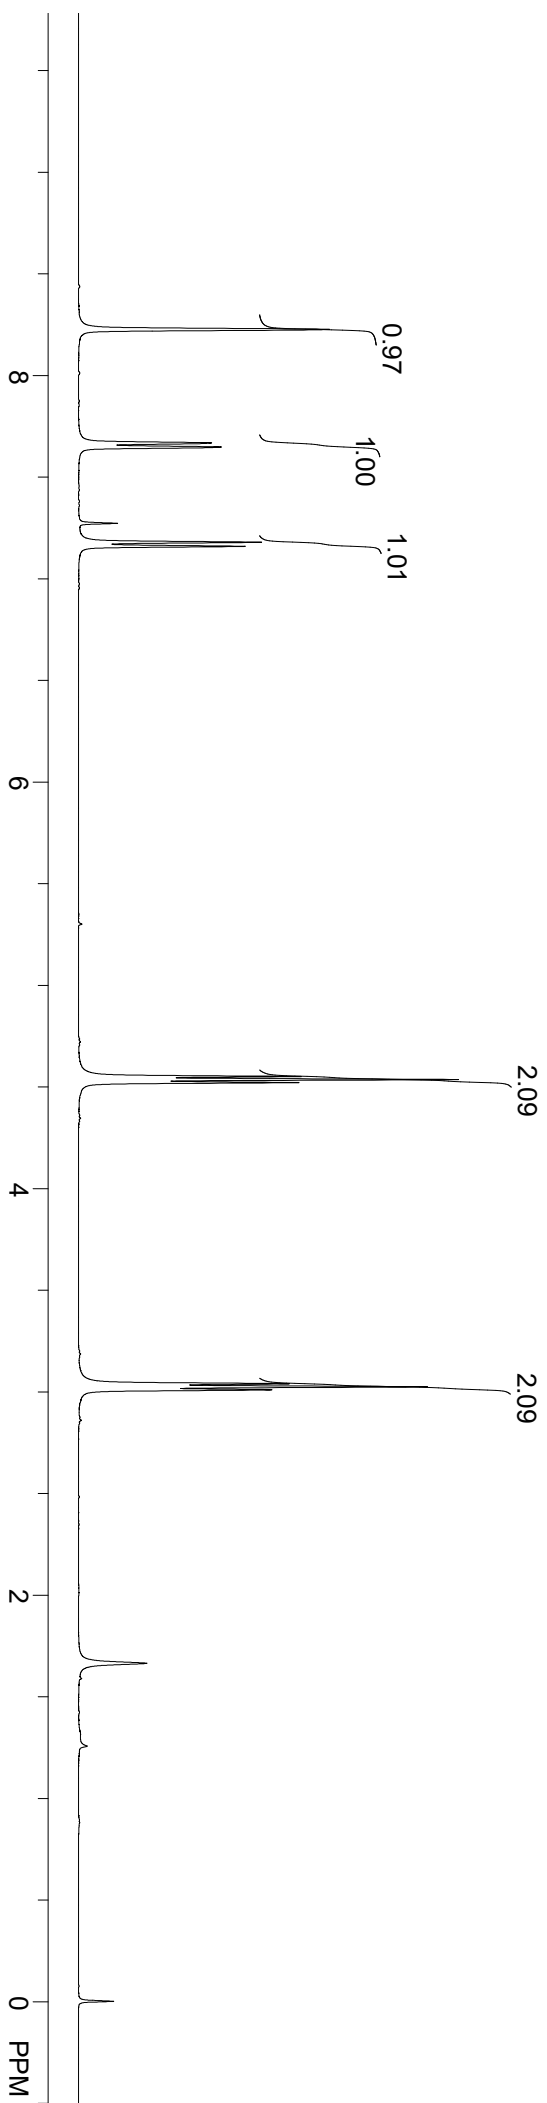

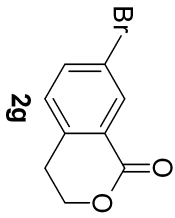

zhangq-3-174-C  
Jul 08 2021  
SOLVENT: CDCl3  
NA = 150  
F1 = 100.612770 MHz  
F2 = 1.000000 MHz

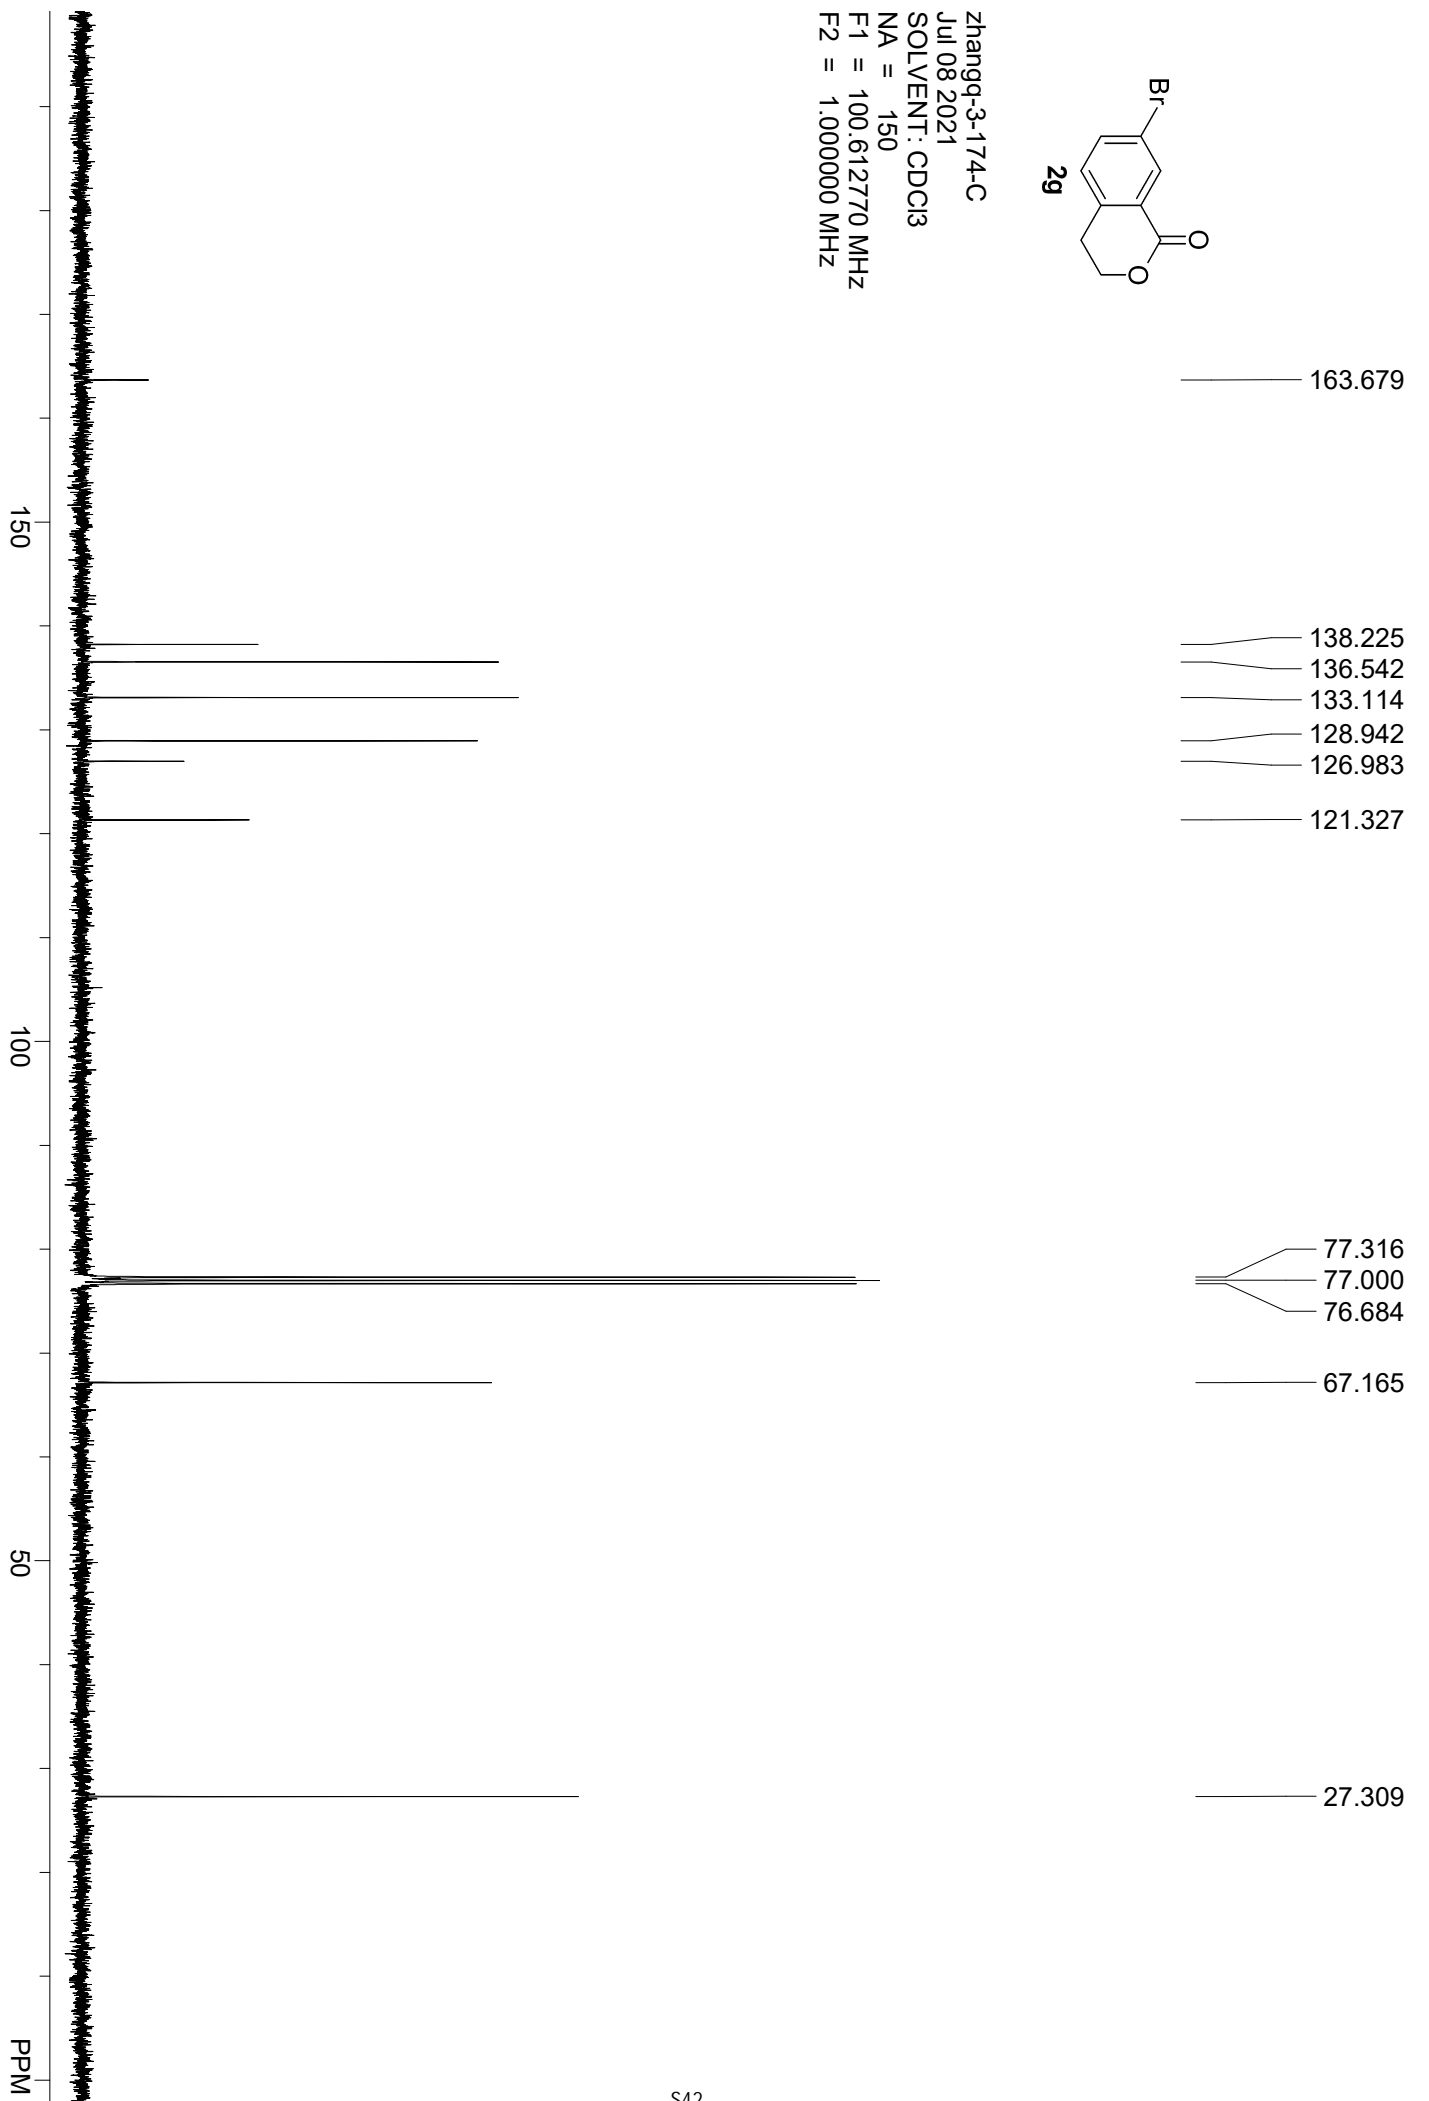

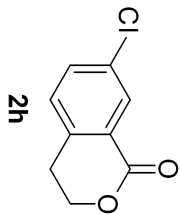

Zhangq-4-127-H  
Dec 01 2021  
SOLVENT: CDCl3  
NA = 4  
F1 = 400.130005 MHz  
F2 = 1.000000 MHz

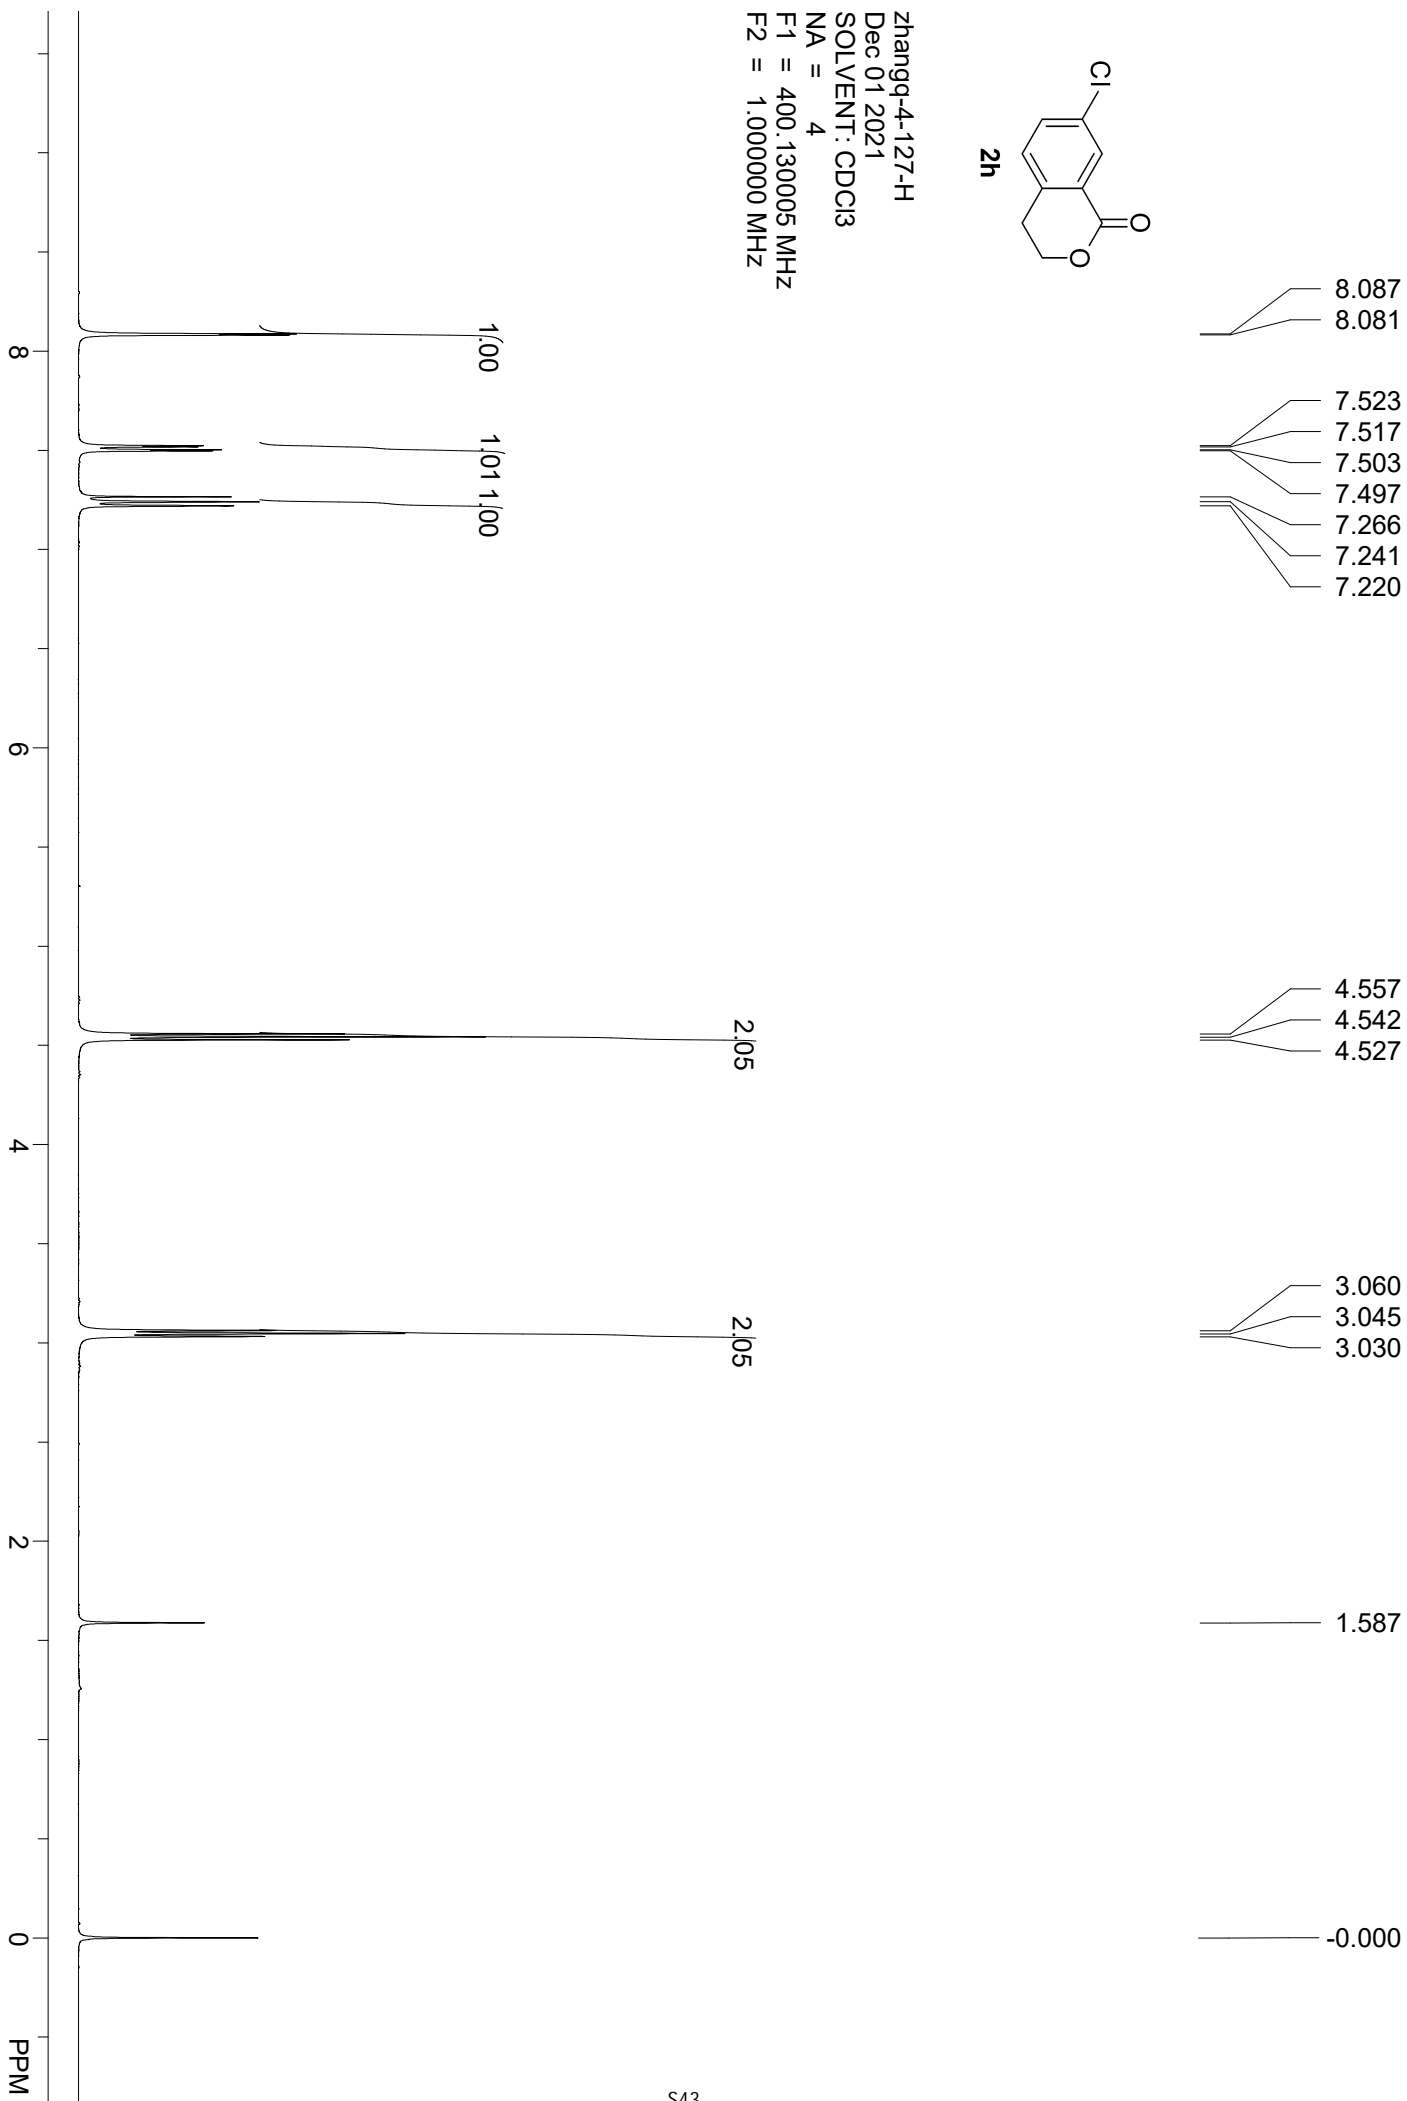

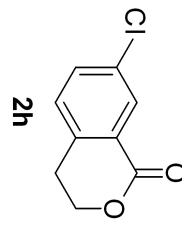

Zhangq-4-127-C  
Dec 01 2021  
SOLVENT: CDCl3  
NA = 300  
F1 = 100.612770 MHz  
F2 = 1.000000 MHz

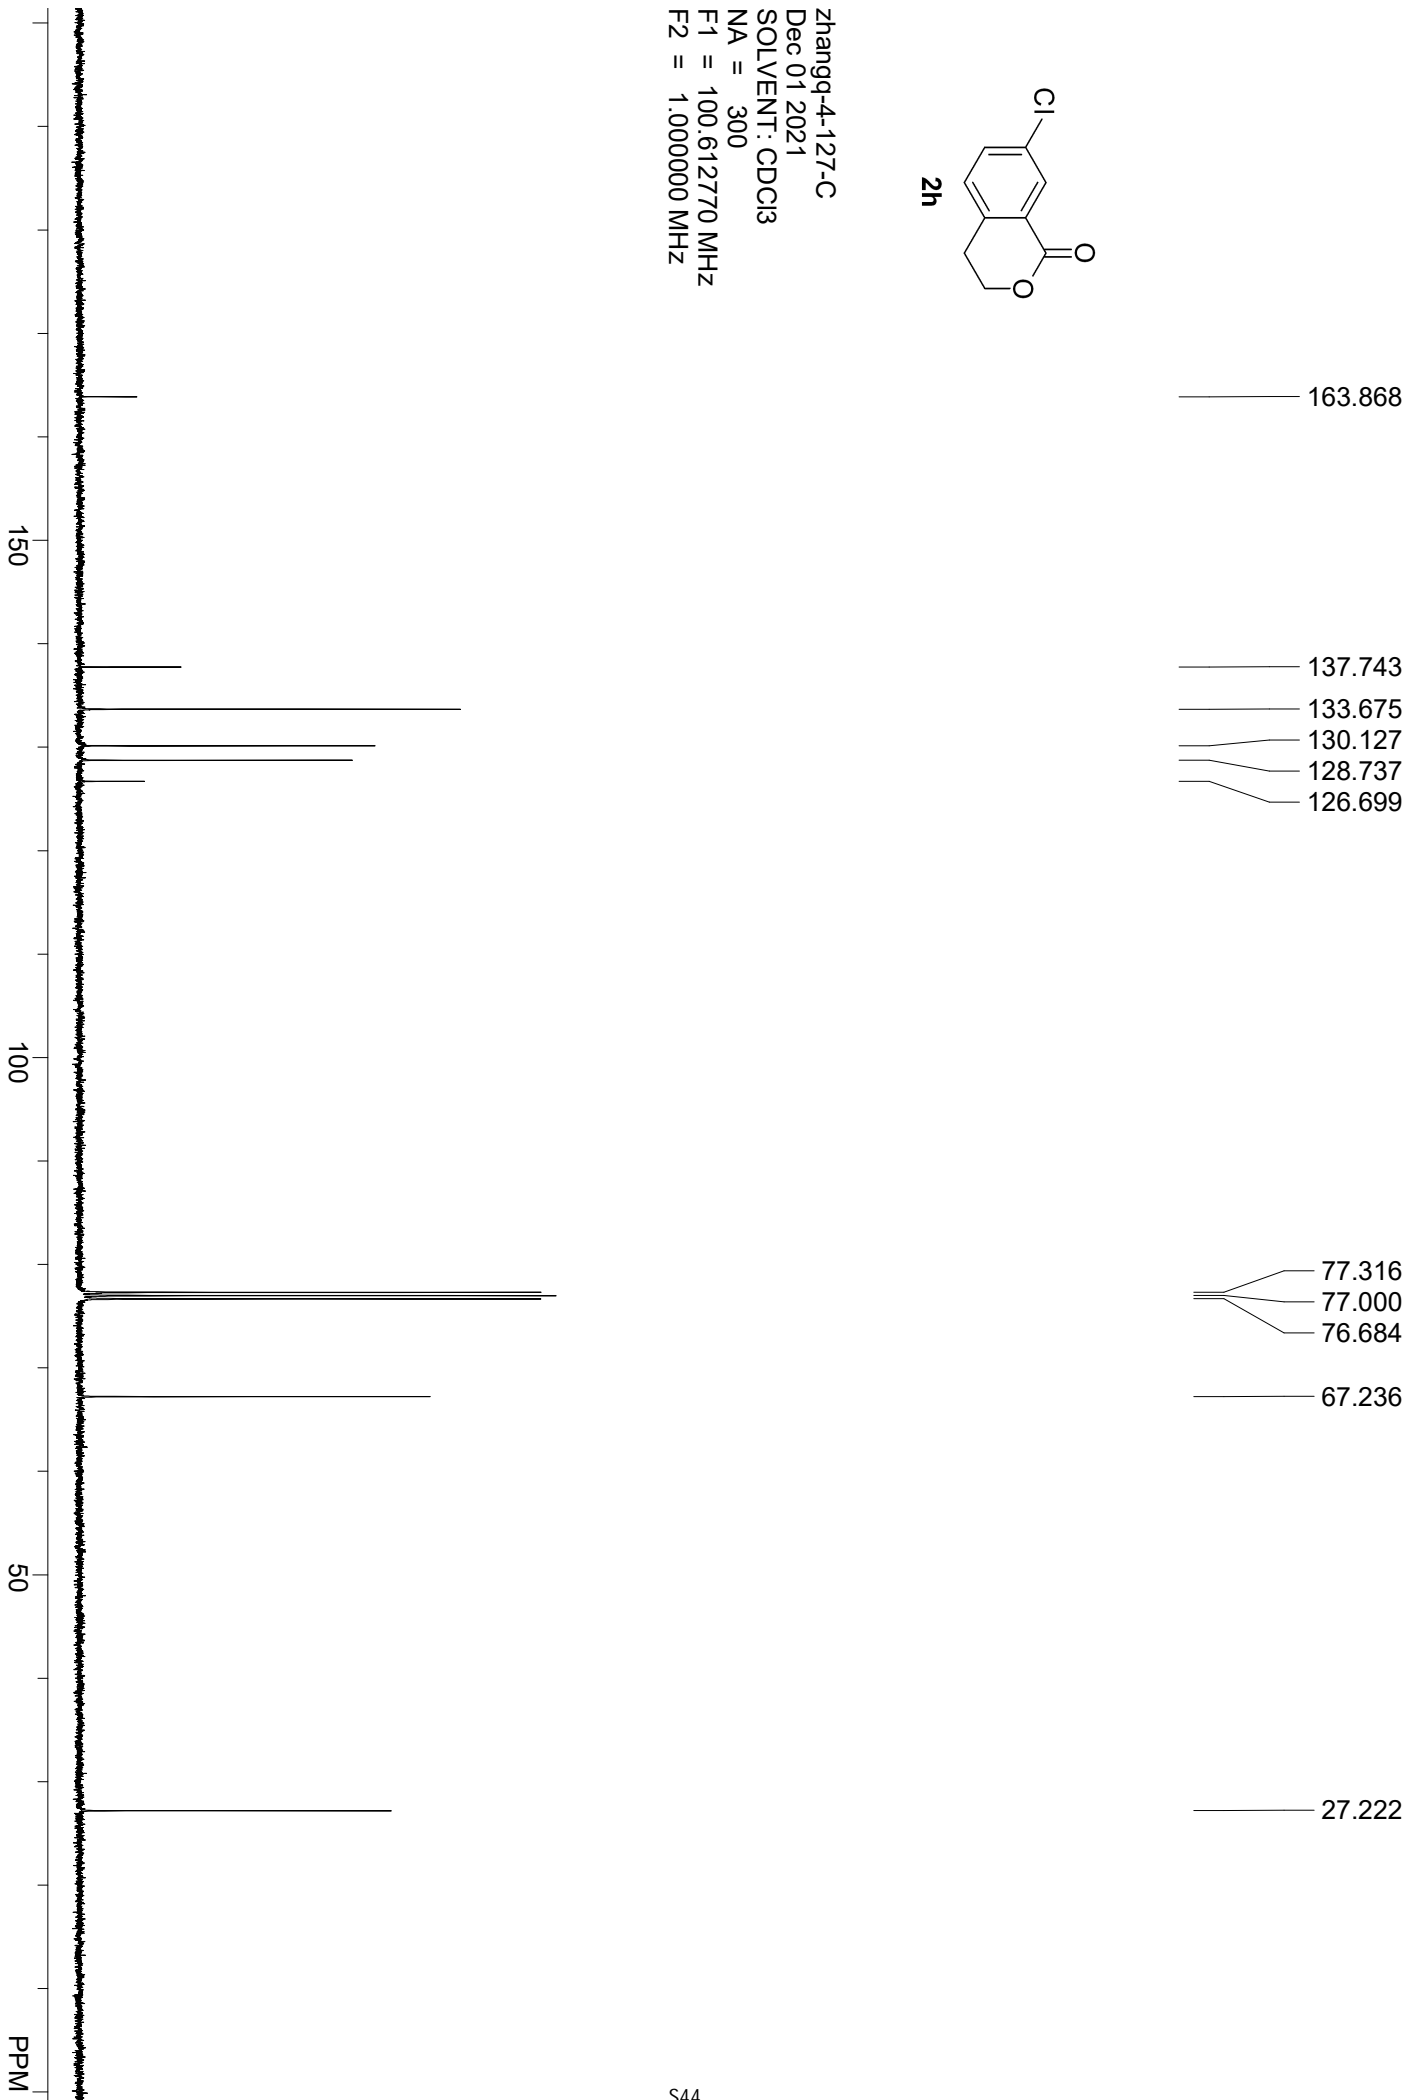

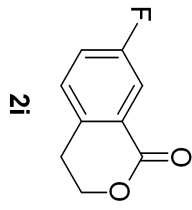

Zhangq-4-128-re  
Dec 01 2021  
SOLVENT: CDCl3  
NA = 4  
F1 = 400.130005 MHz  
F2 = 1.000000 MHz

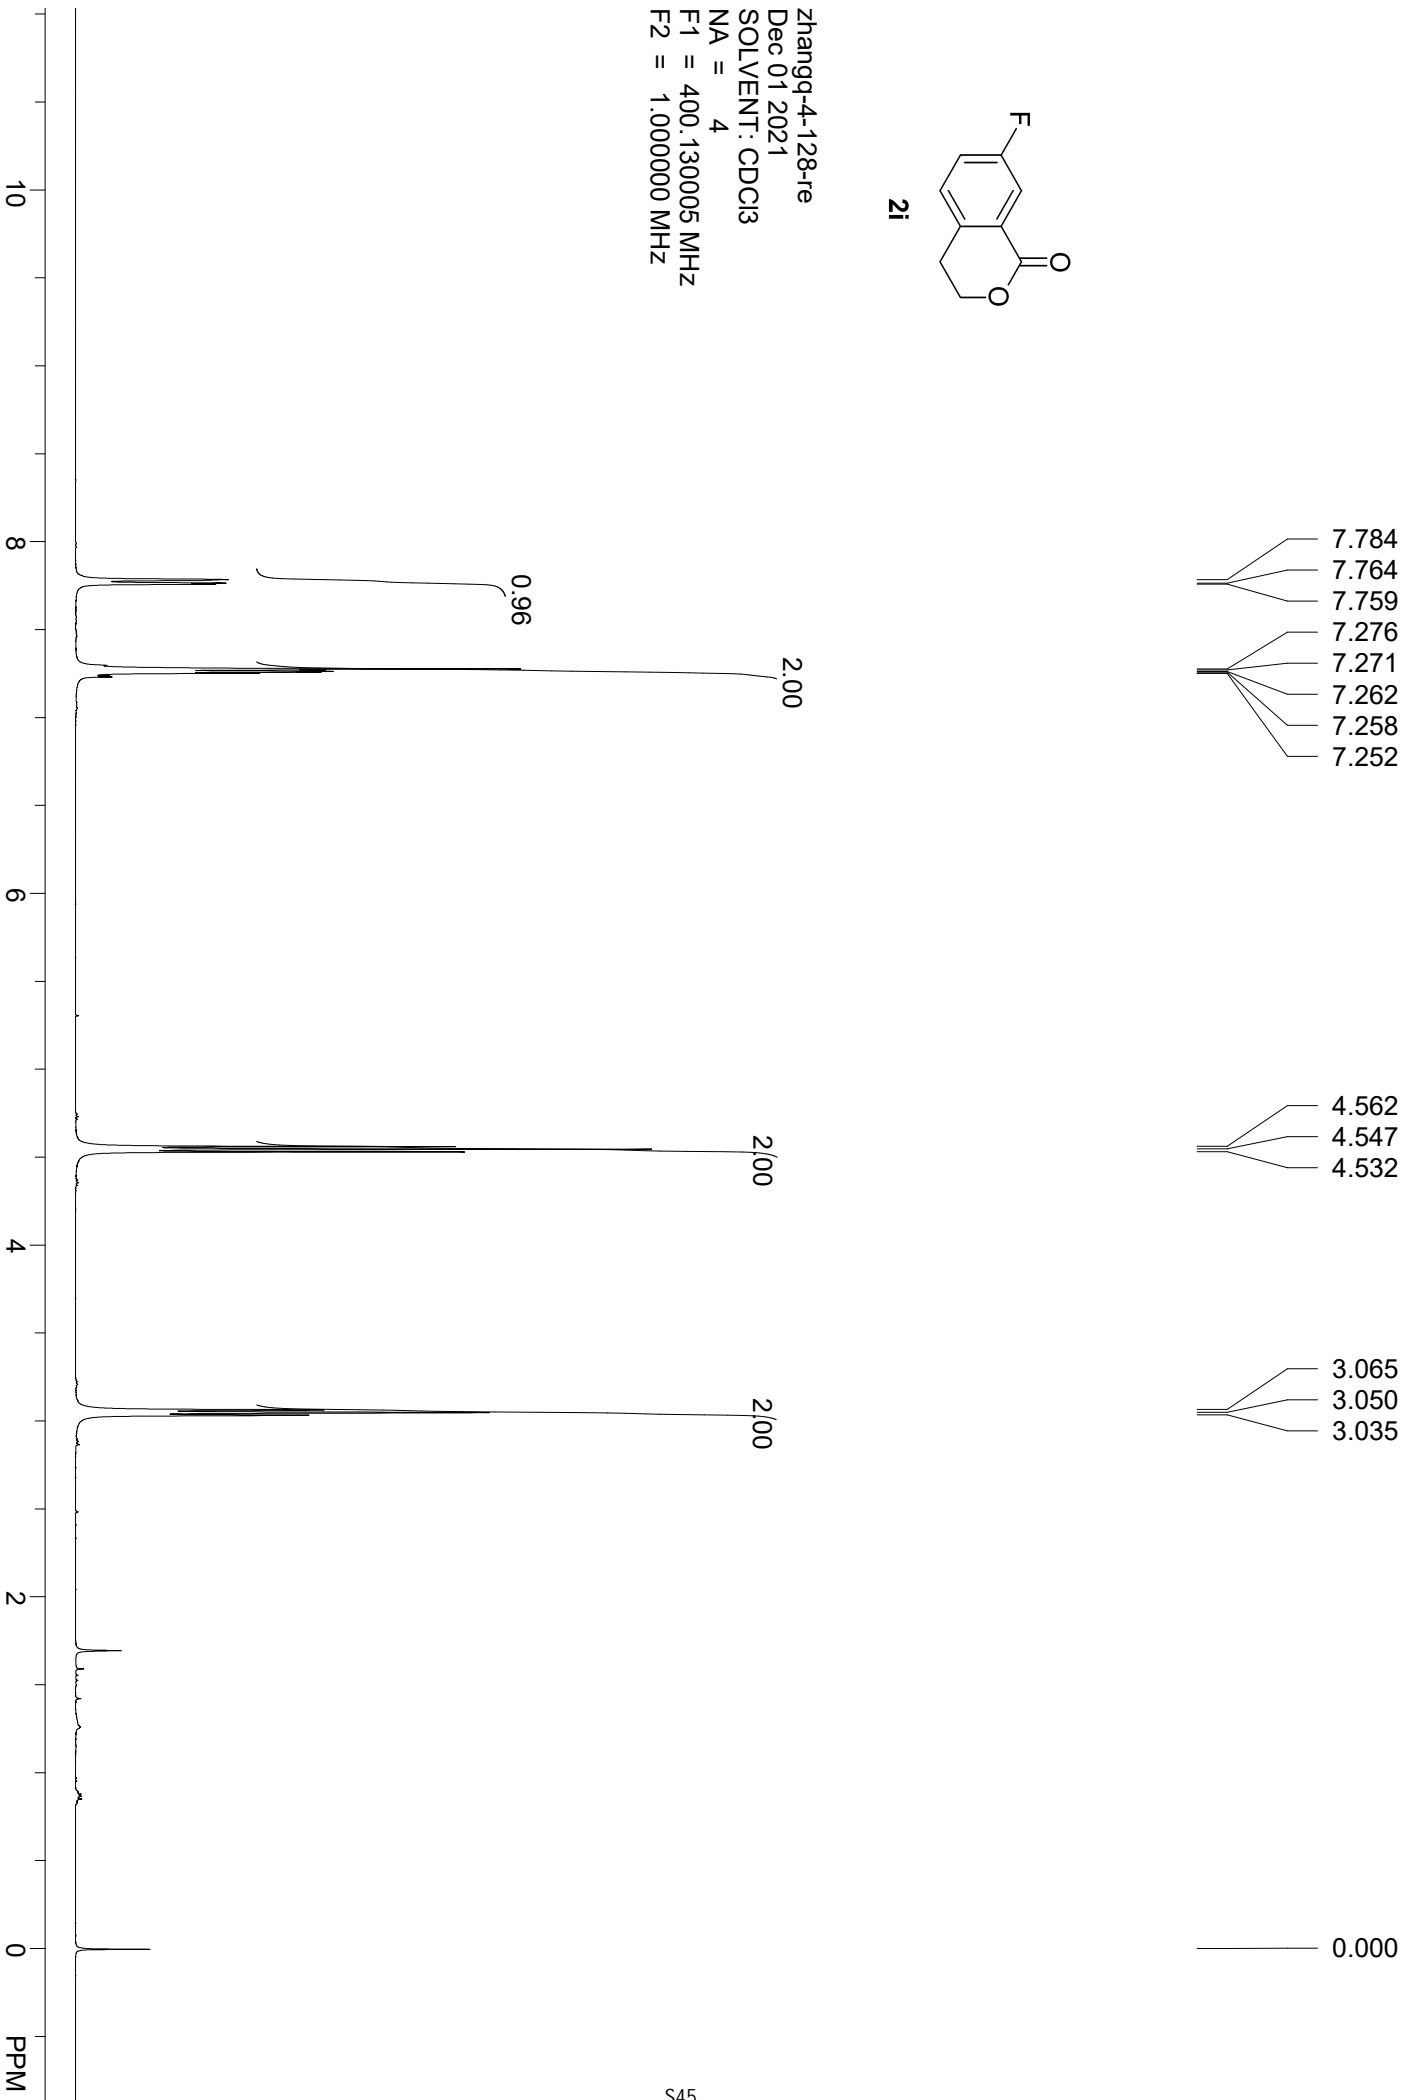

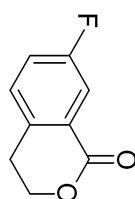

2i

Zhangq-4-128-C  
Nov 30 2021  
SOLVENT: CDCl3  
NA = 300  
F1 = 100.612770 MHz  
F2 = 1.000000 MHz

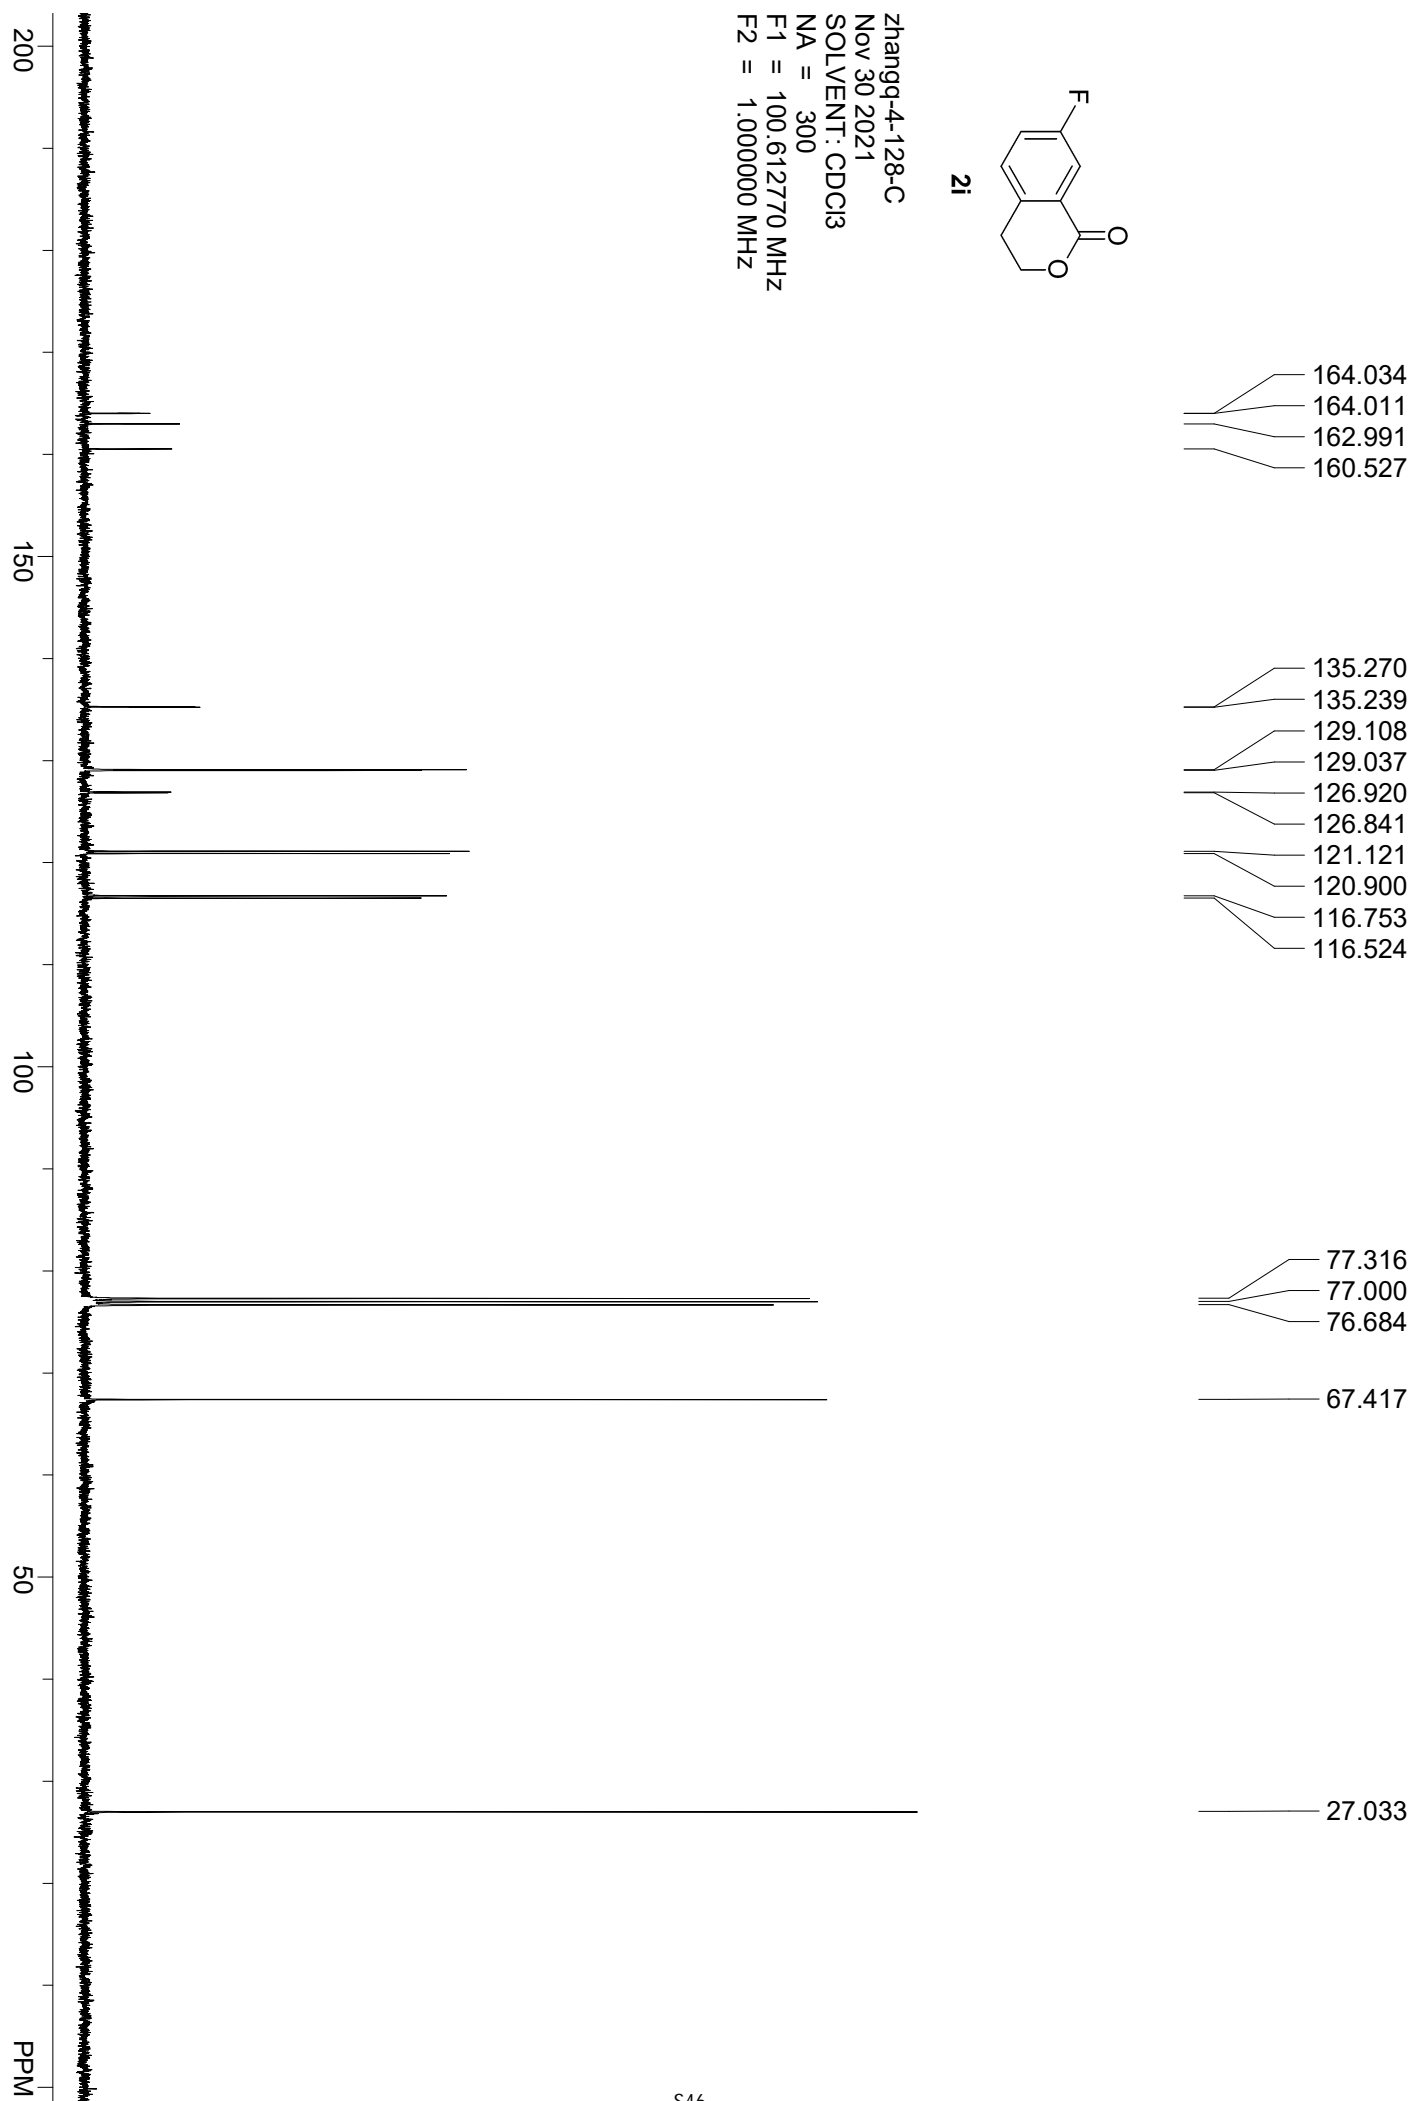

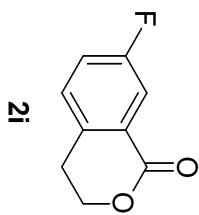

Zhangq-4-128-F  
Nov 30 2021  
SOLVENT: CDCl3  
NA = 16  
F1 = 376.460724 MHz  
F2 = 1.000000 MHz

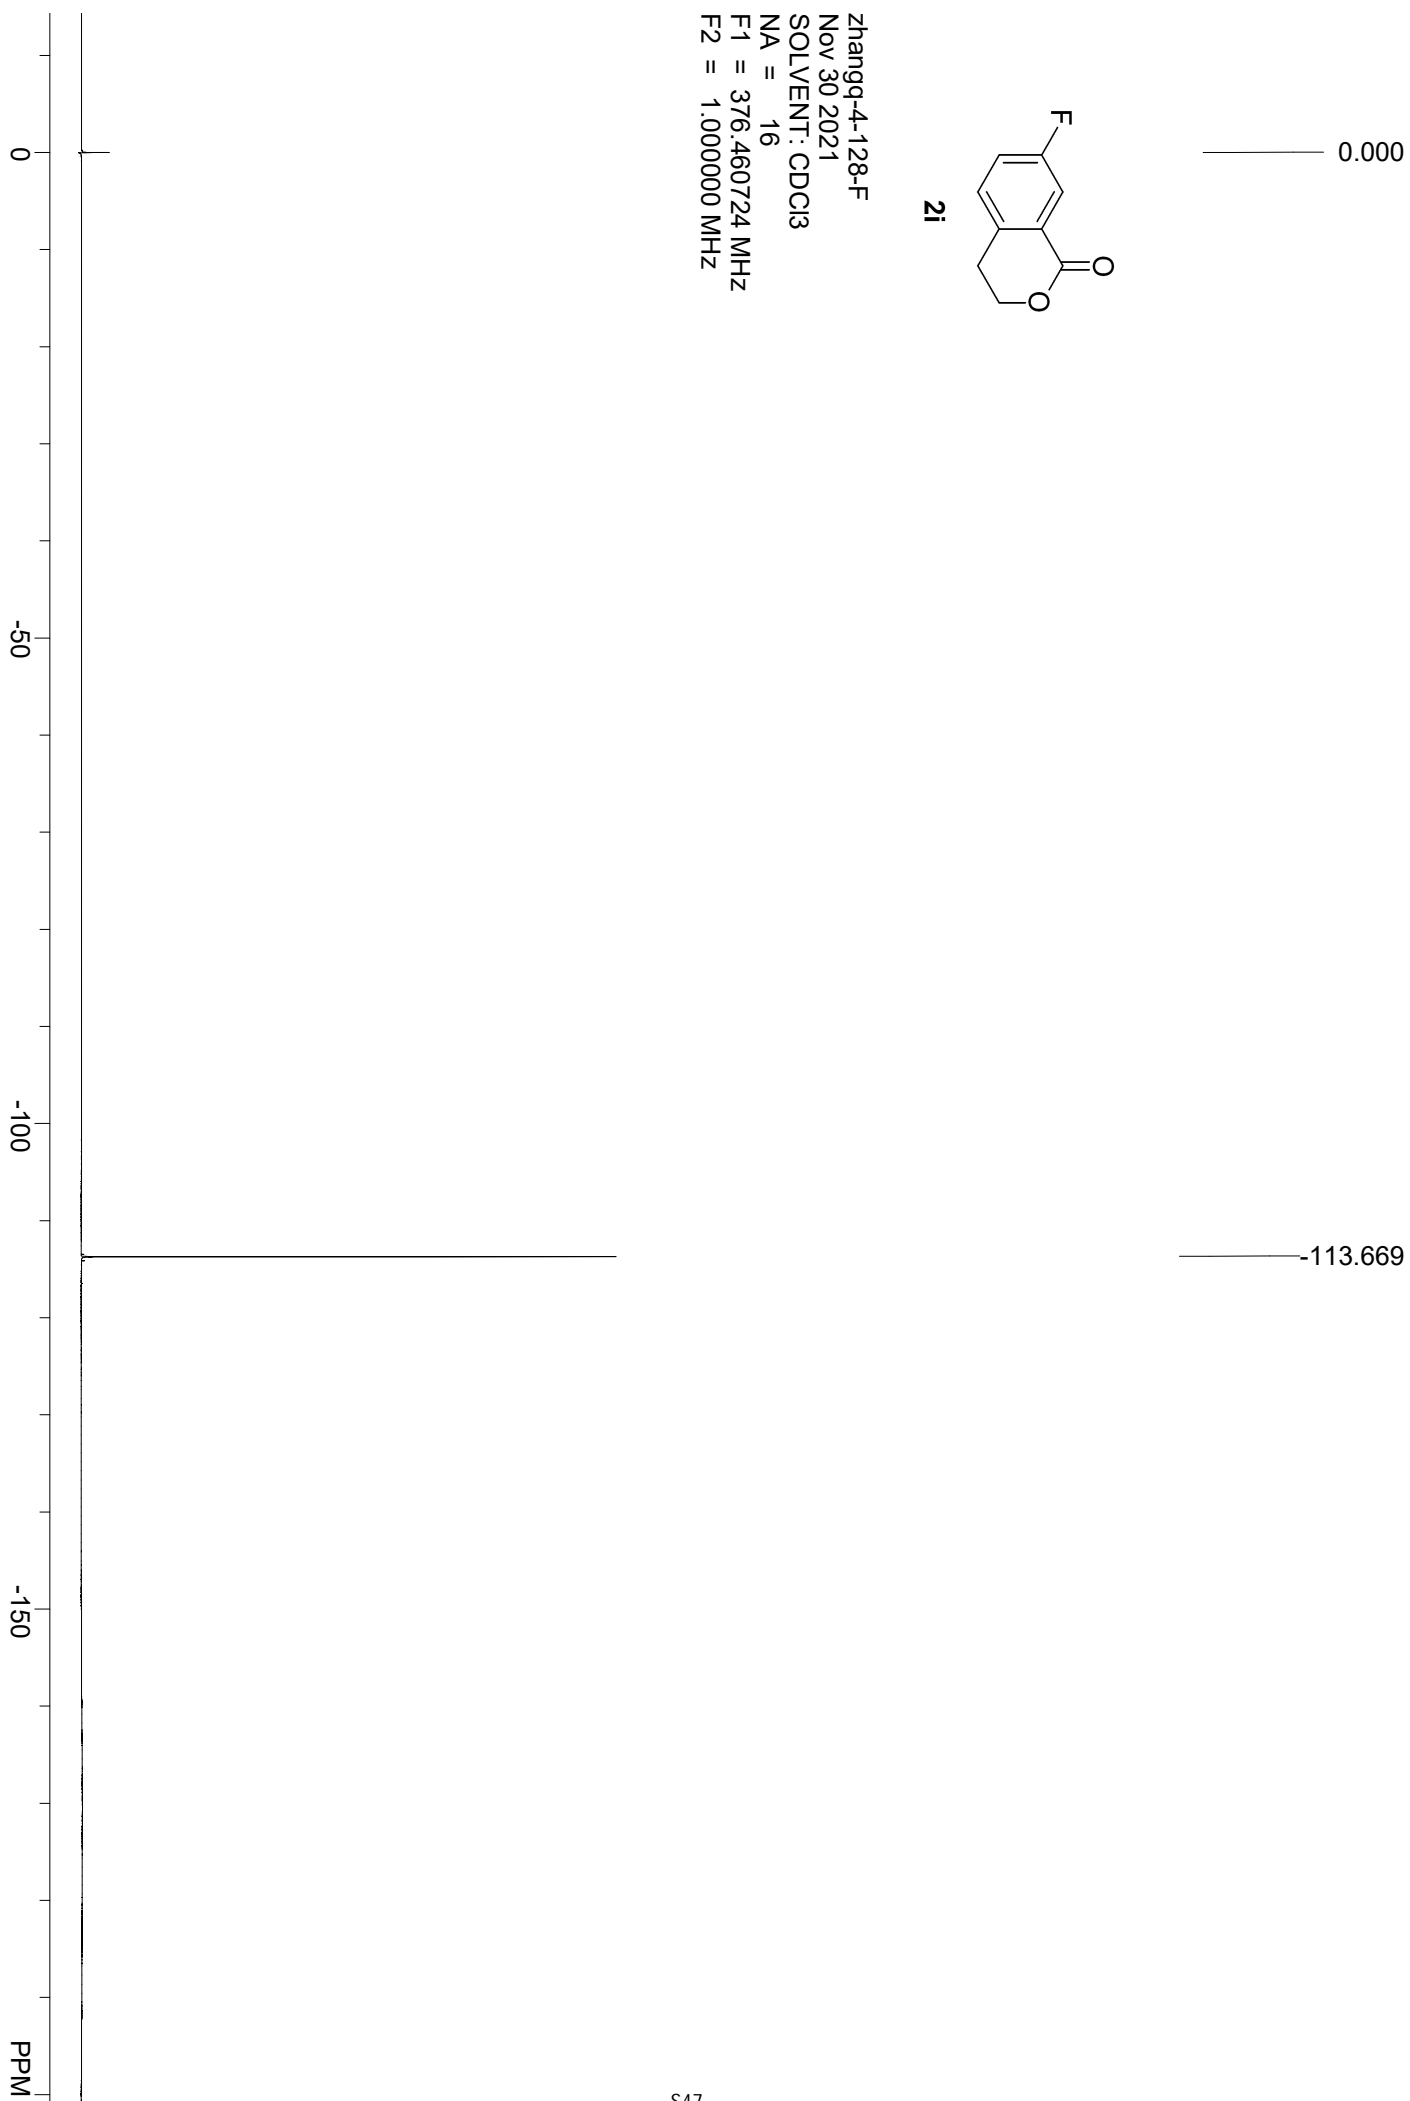

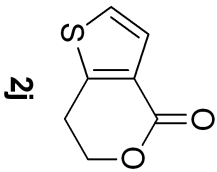

Zhangq-5-019-H  
Mar 08 2022  
SOLVENT: CDCl3  
NA = 4  
F1 = 400.130005 MHz  
F2 = 1.000000 MHz

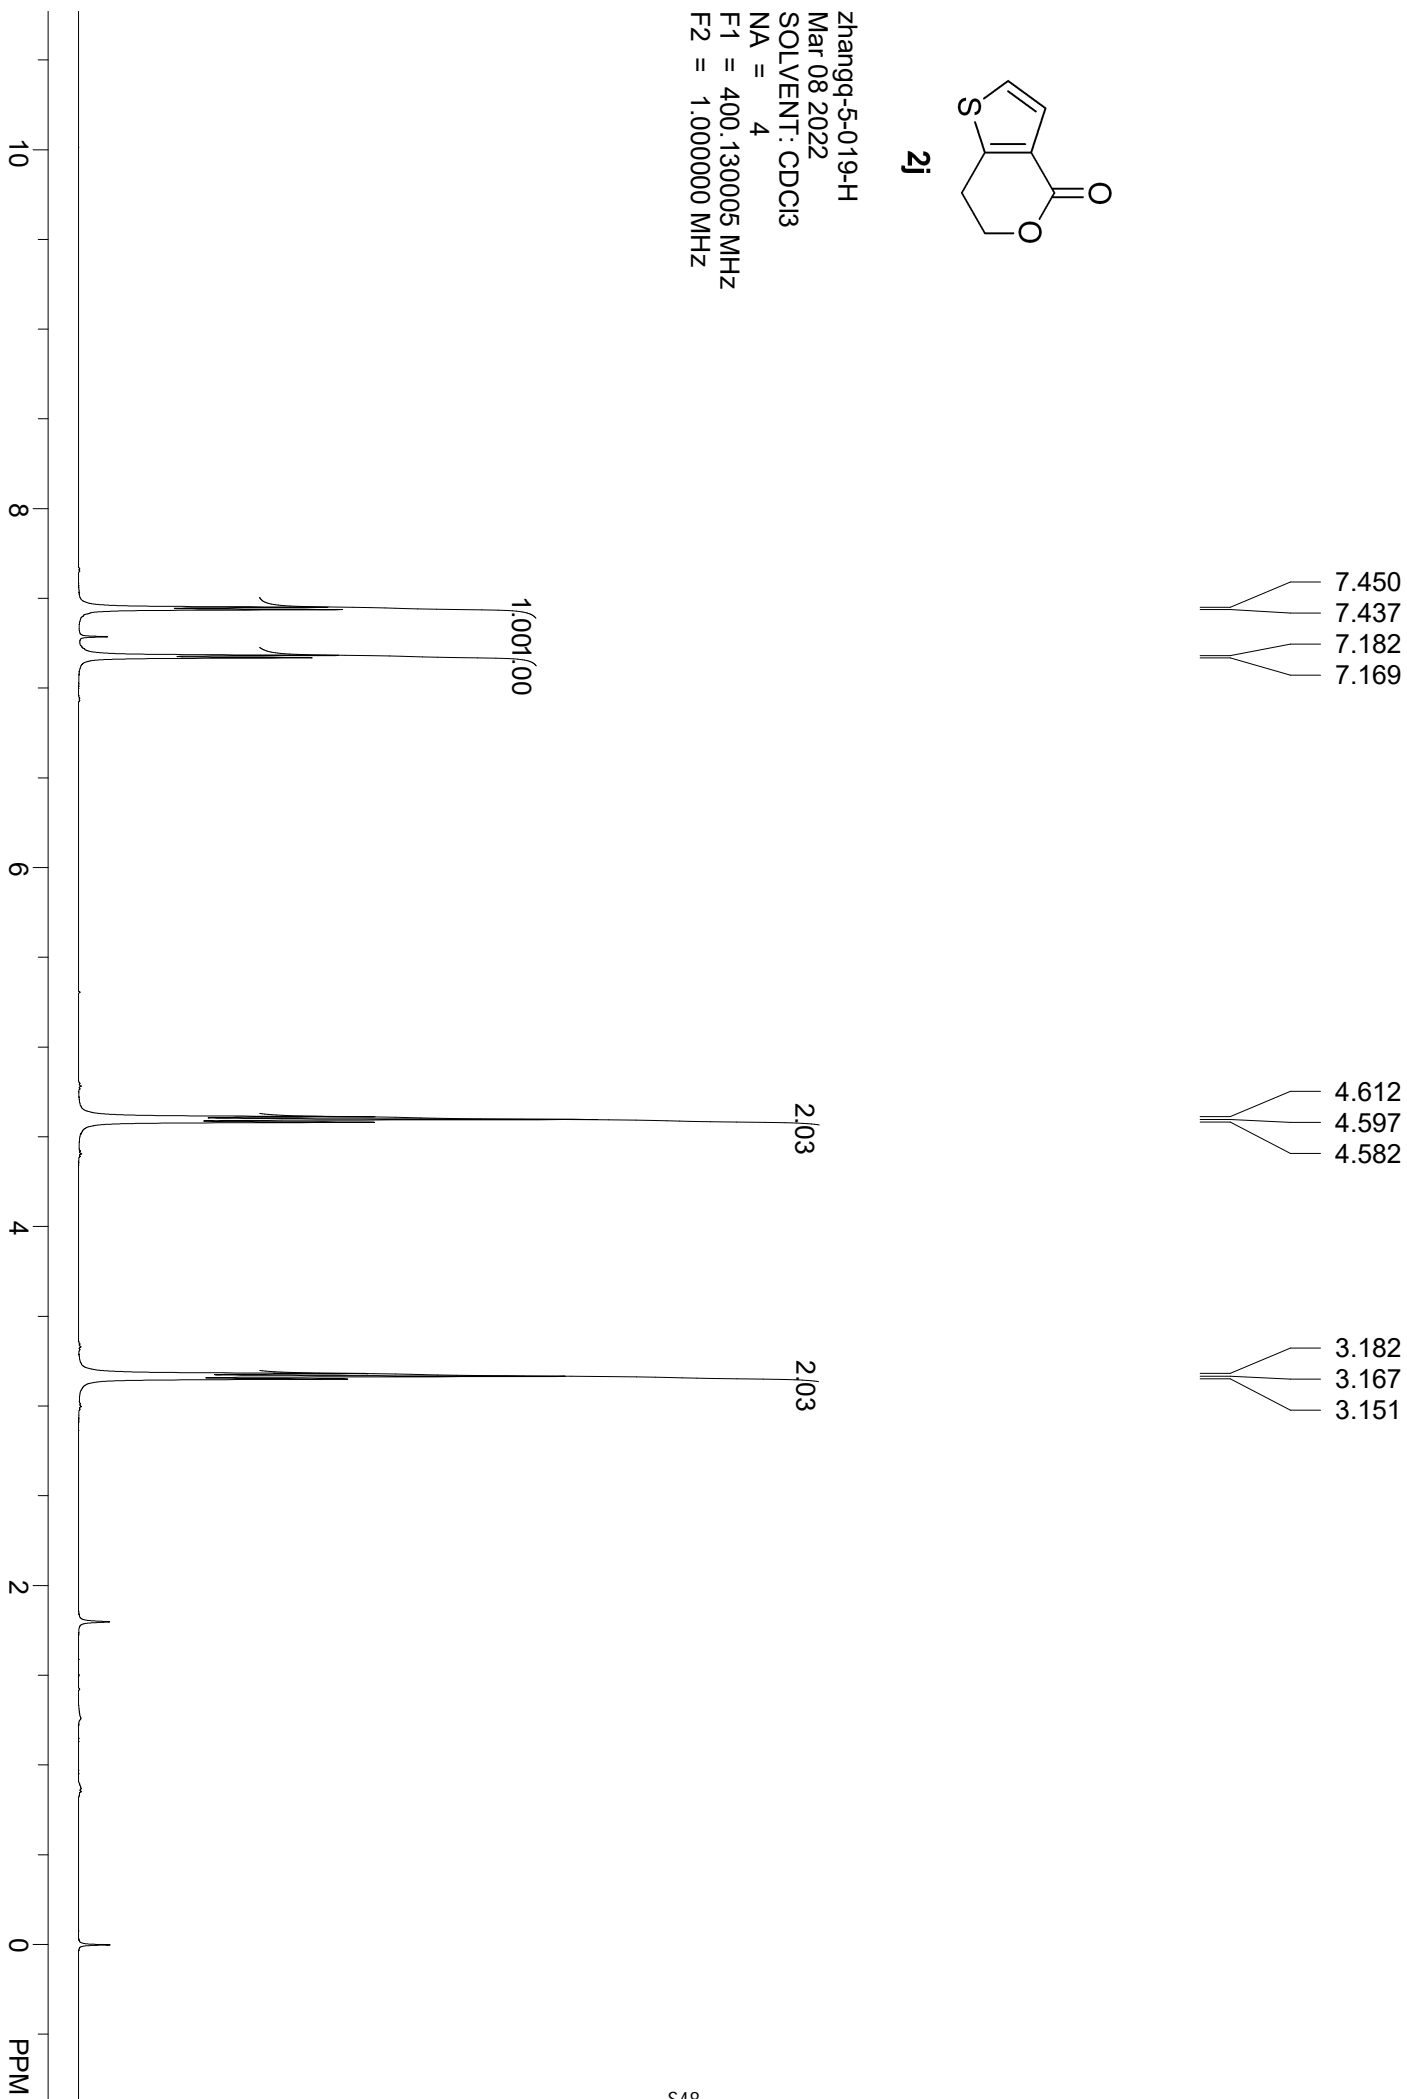



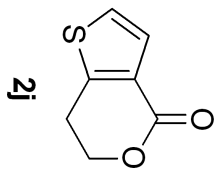

Zhangq-5-019-C  
Mar 07 2022  
SOLVENT: CDCl3  
NA = 150  
F1 = 100.612770 MHz  
F2 = 1.000000 MHz

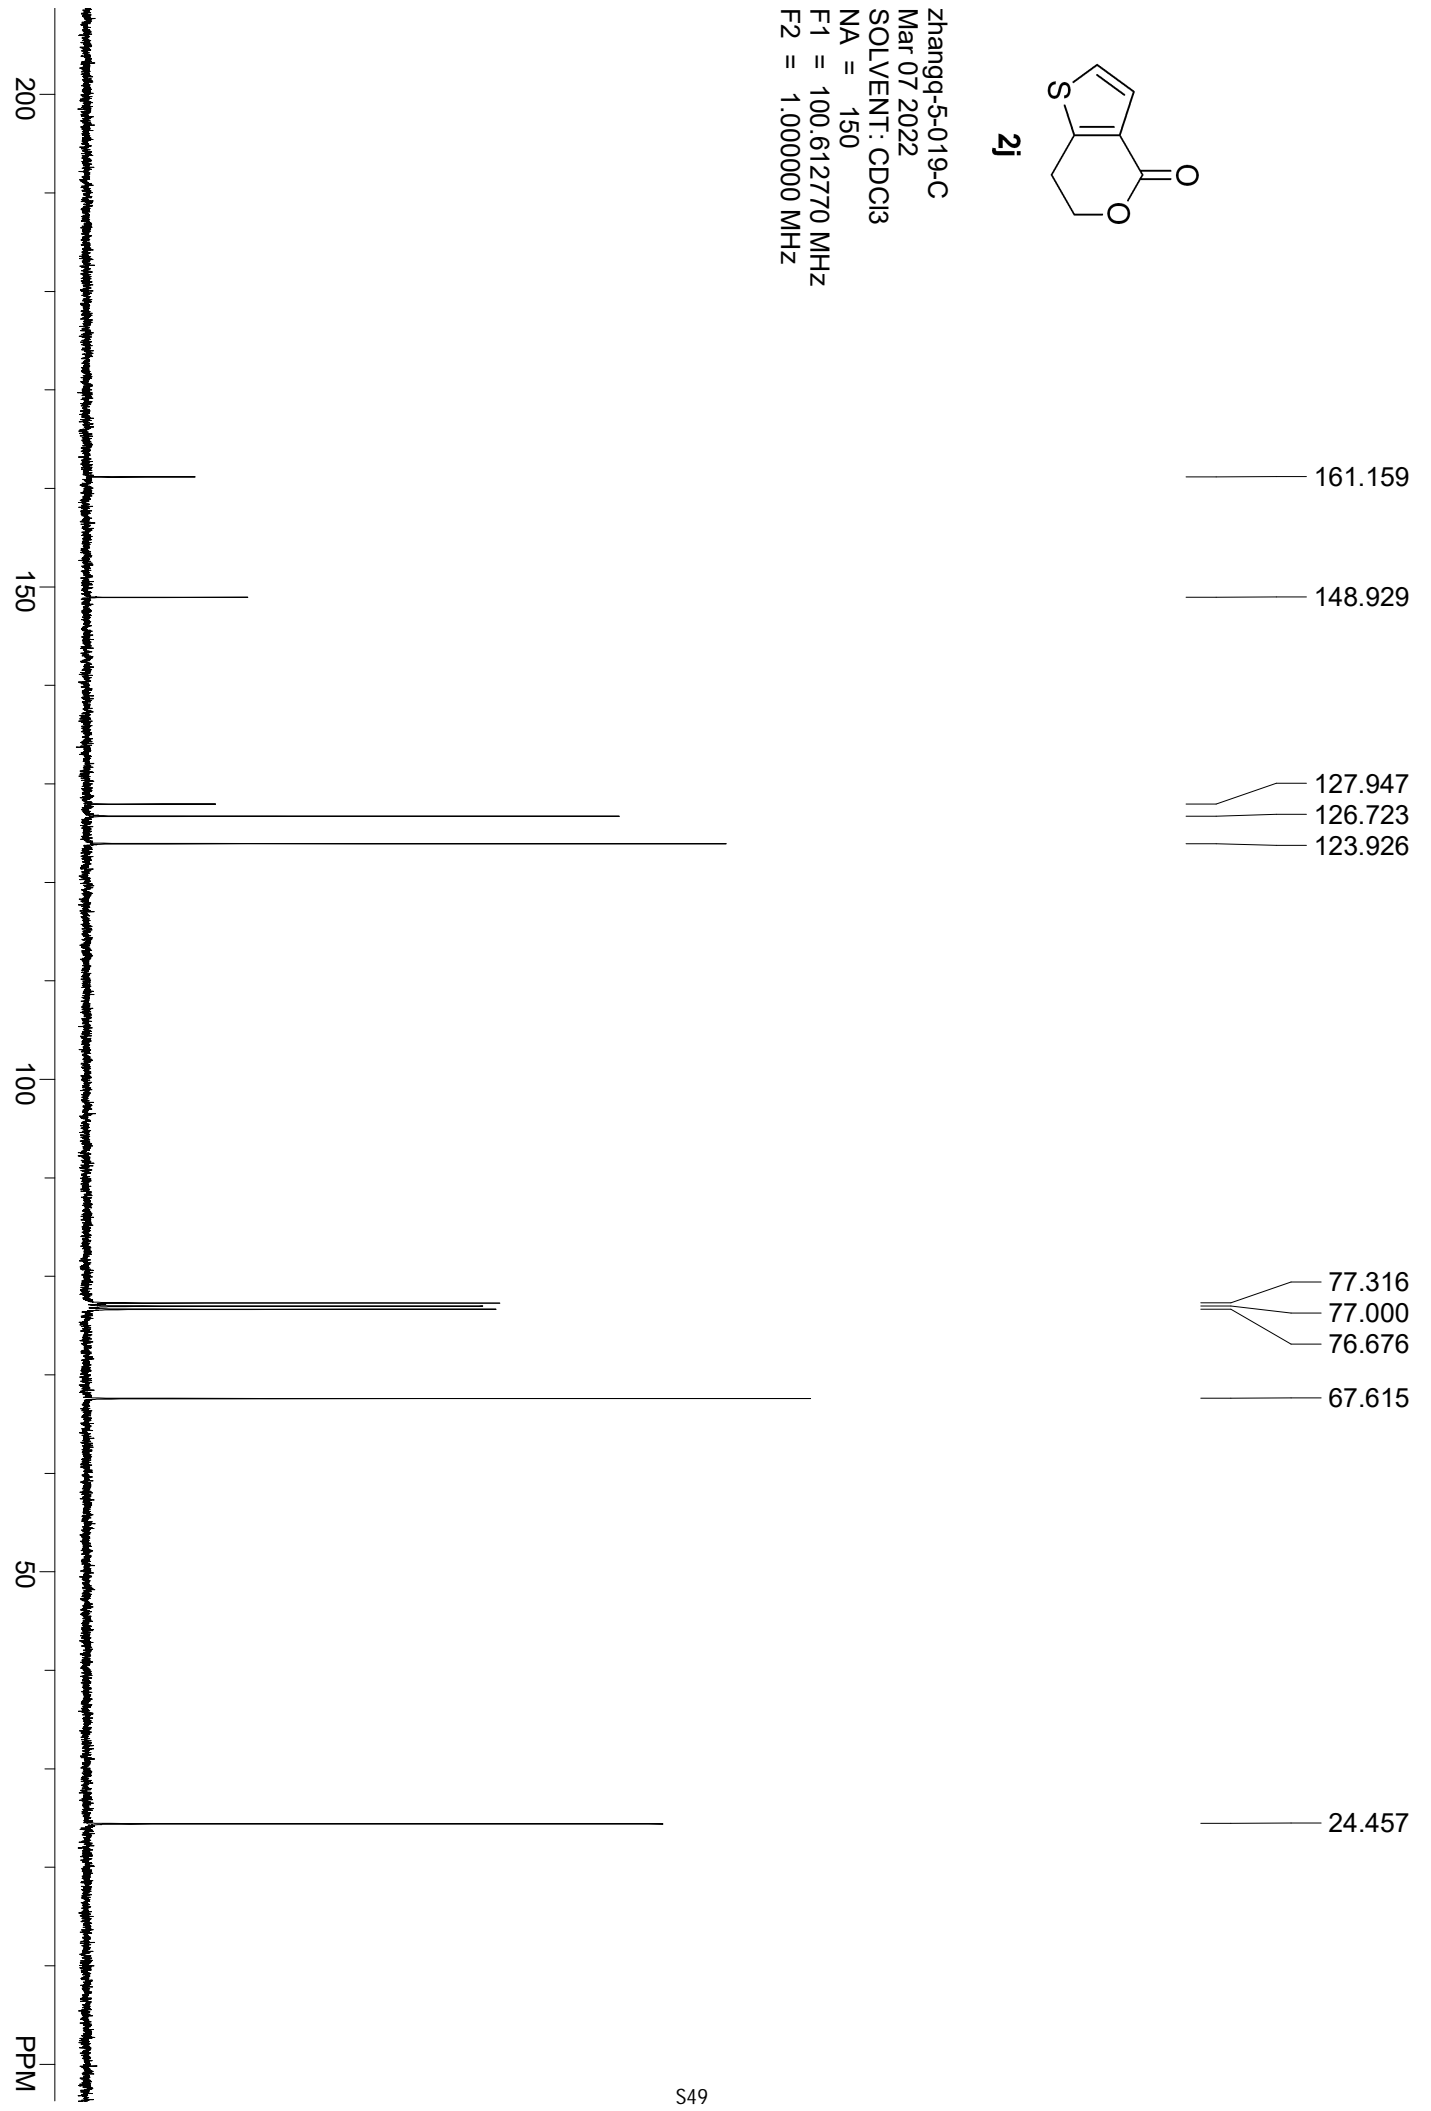

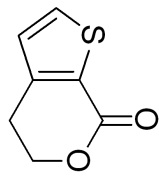

2k

Zhangq-5-033-2-H  
Mar 21 2022  
SOLVENT: CDCl3  
NA = 4  
F1 = 400.129974 MHz  
F2 = 1.000000 MHz

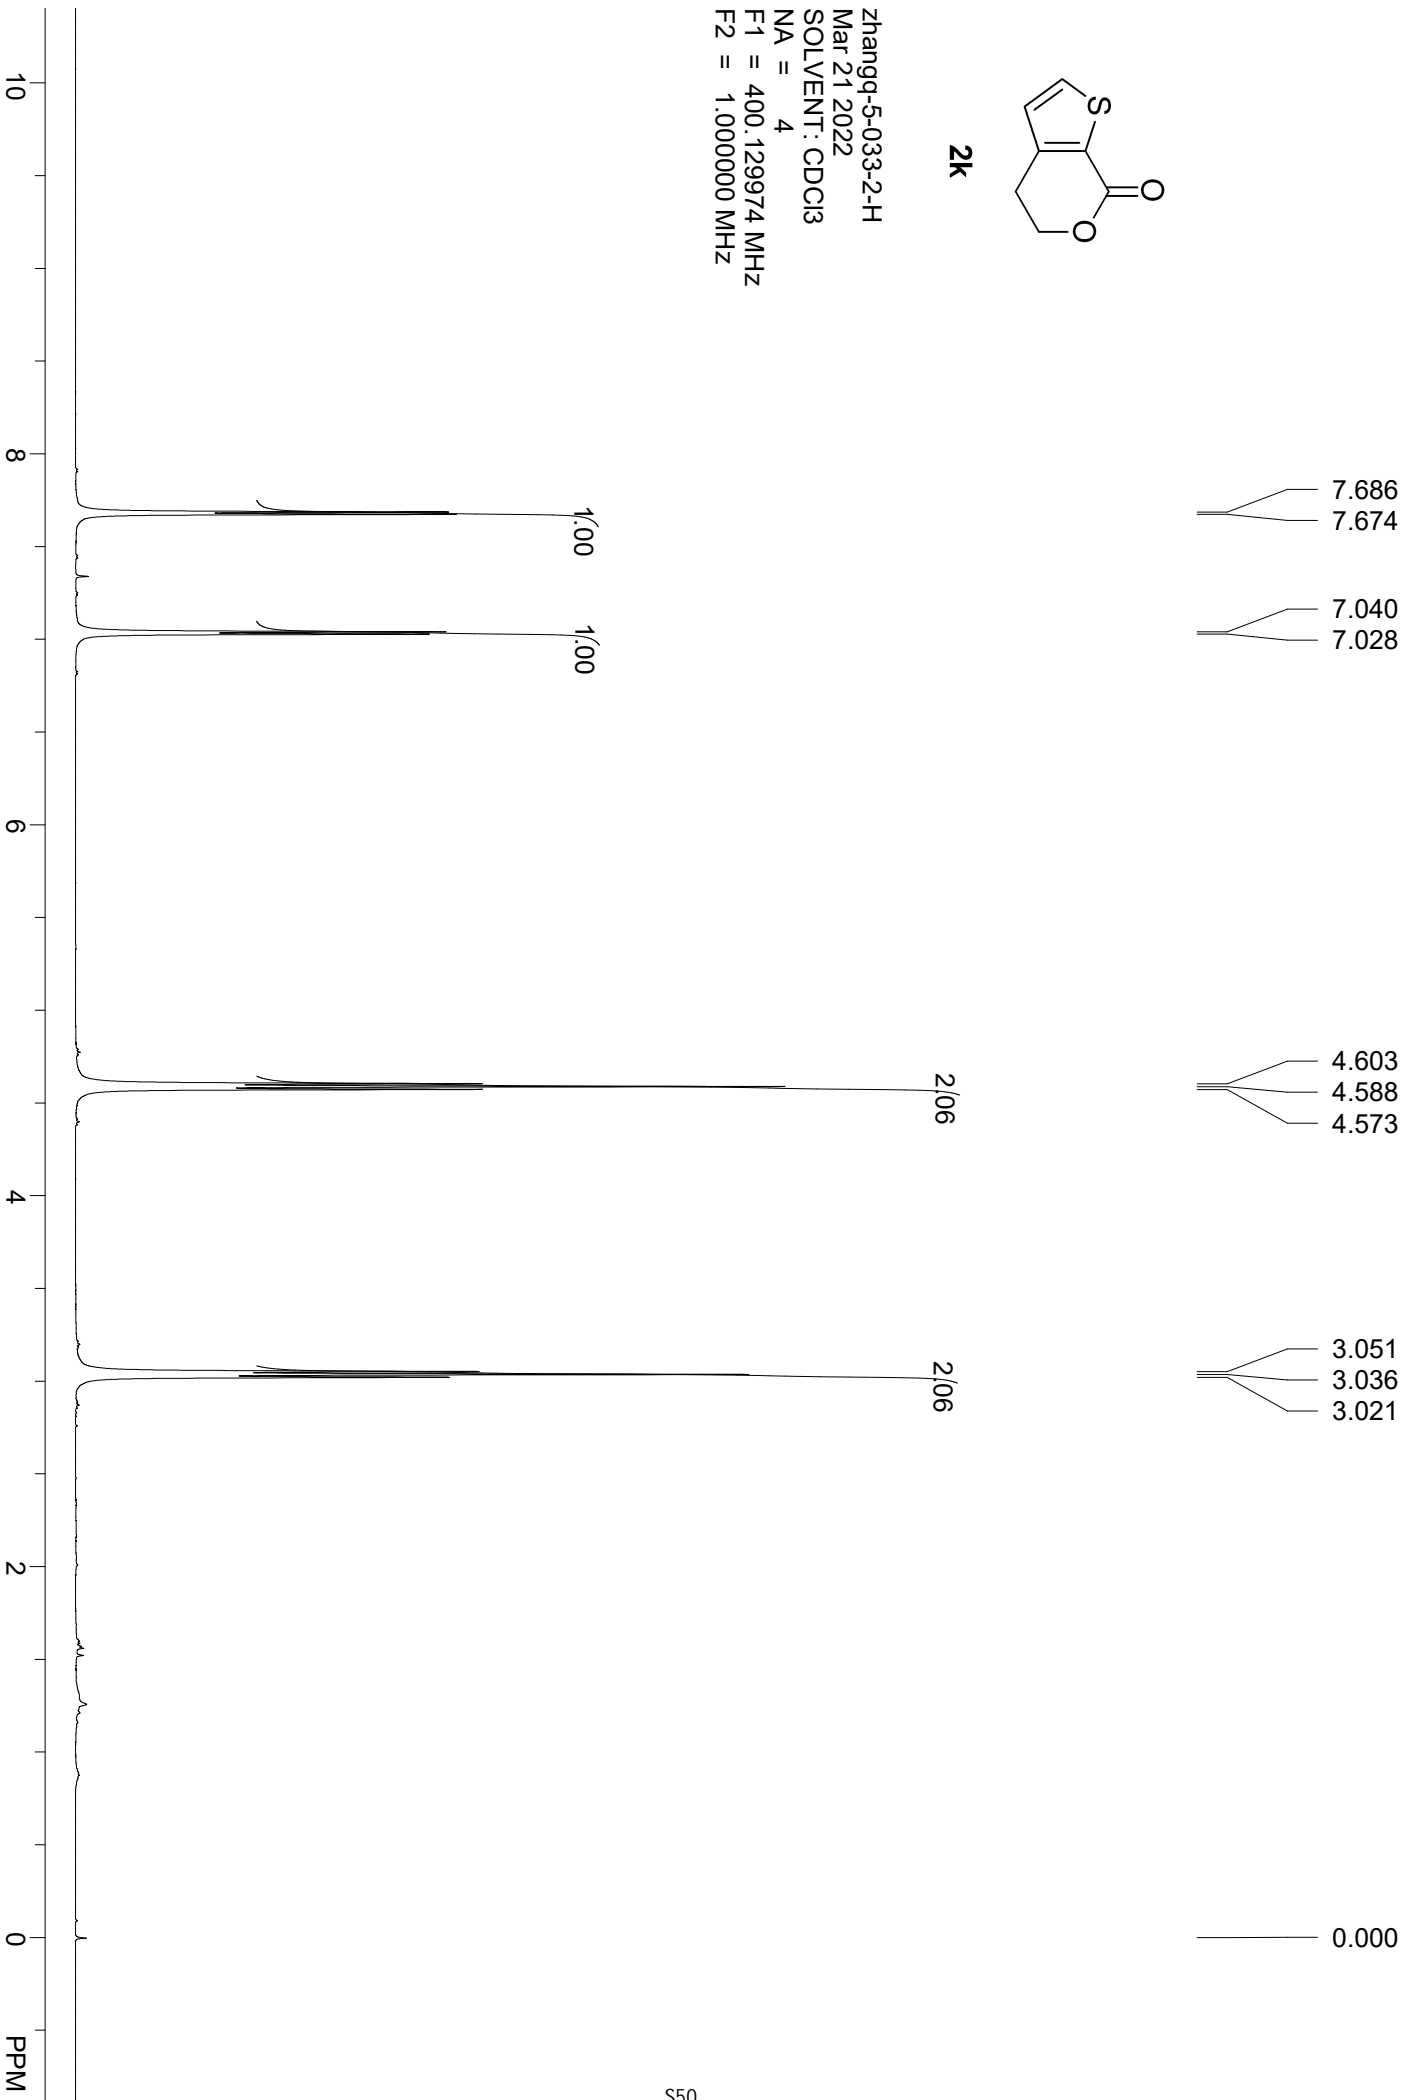

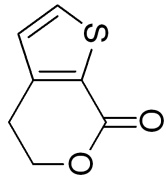

**2k**

Zhangq-5-033-2-C  
Mar 21 2022  
SOLVENT: CDCl3  
NA = 64  
F1 = 100.612770 MHz  
F2 = 1.000000 MHz

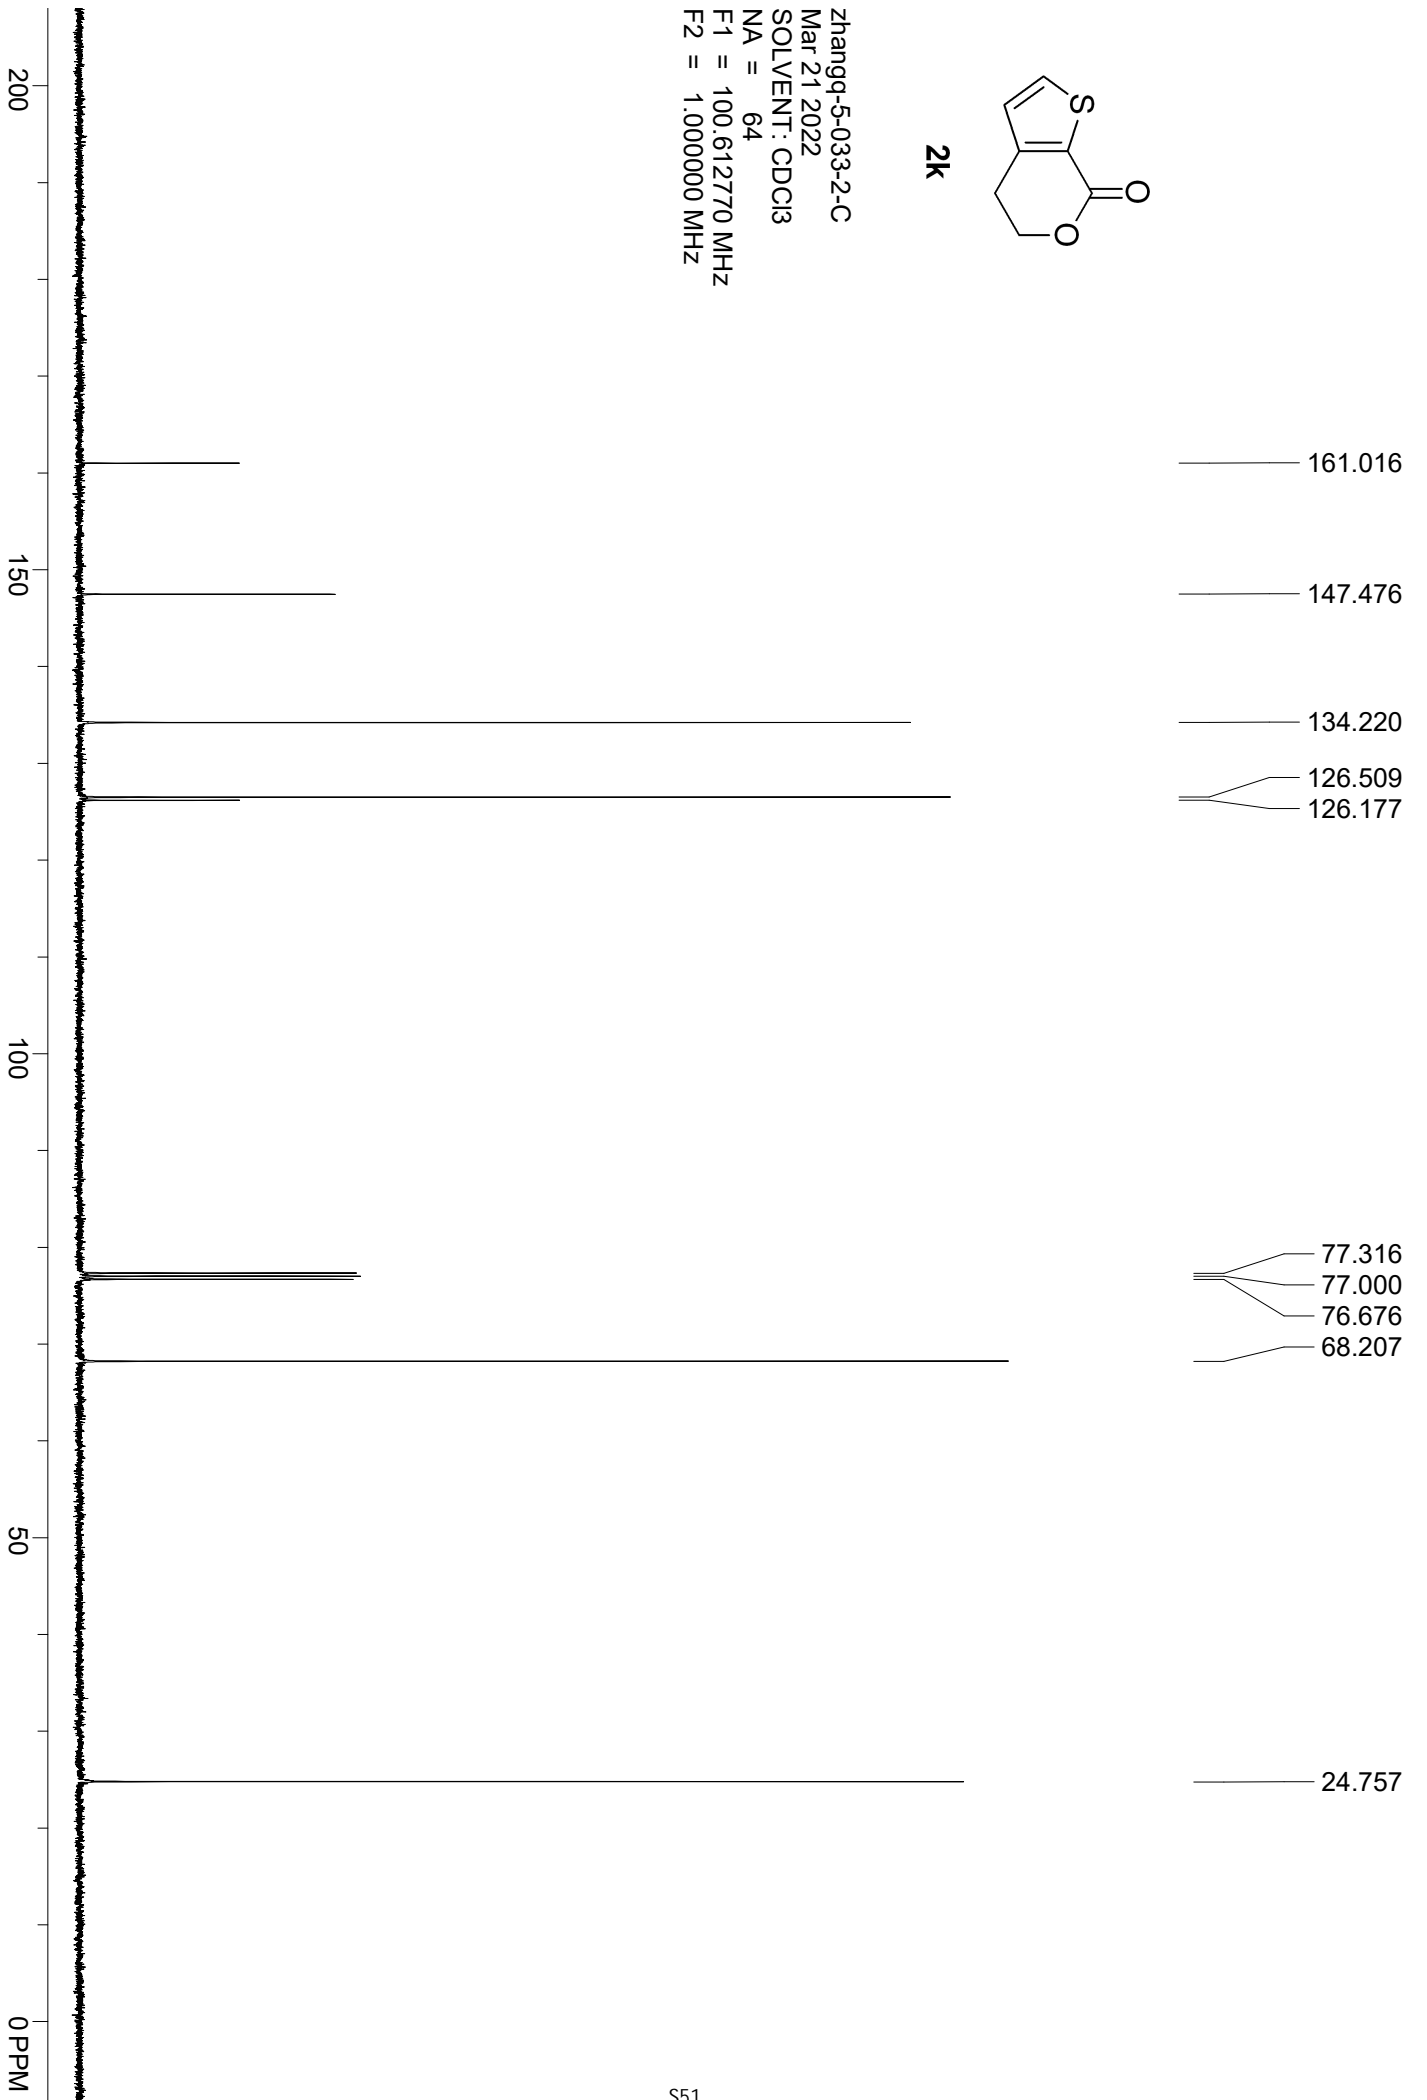

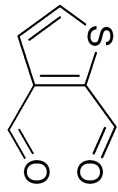

**3k**

Zhangq-5-033-1-H  
Mar 21 2022  
SOLVENT: CDCl3  
NA = 4  
F1 = 400.130005 MHz  
F2 = 1.000000 MHz

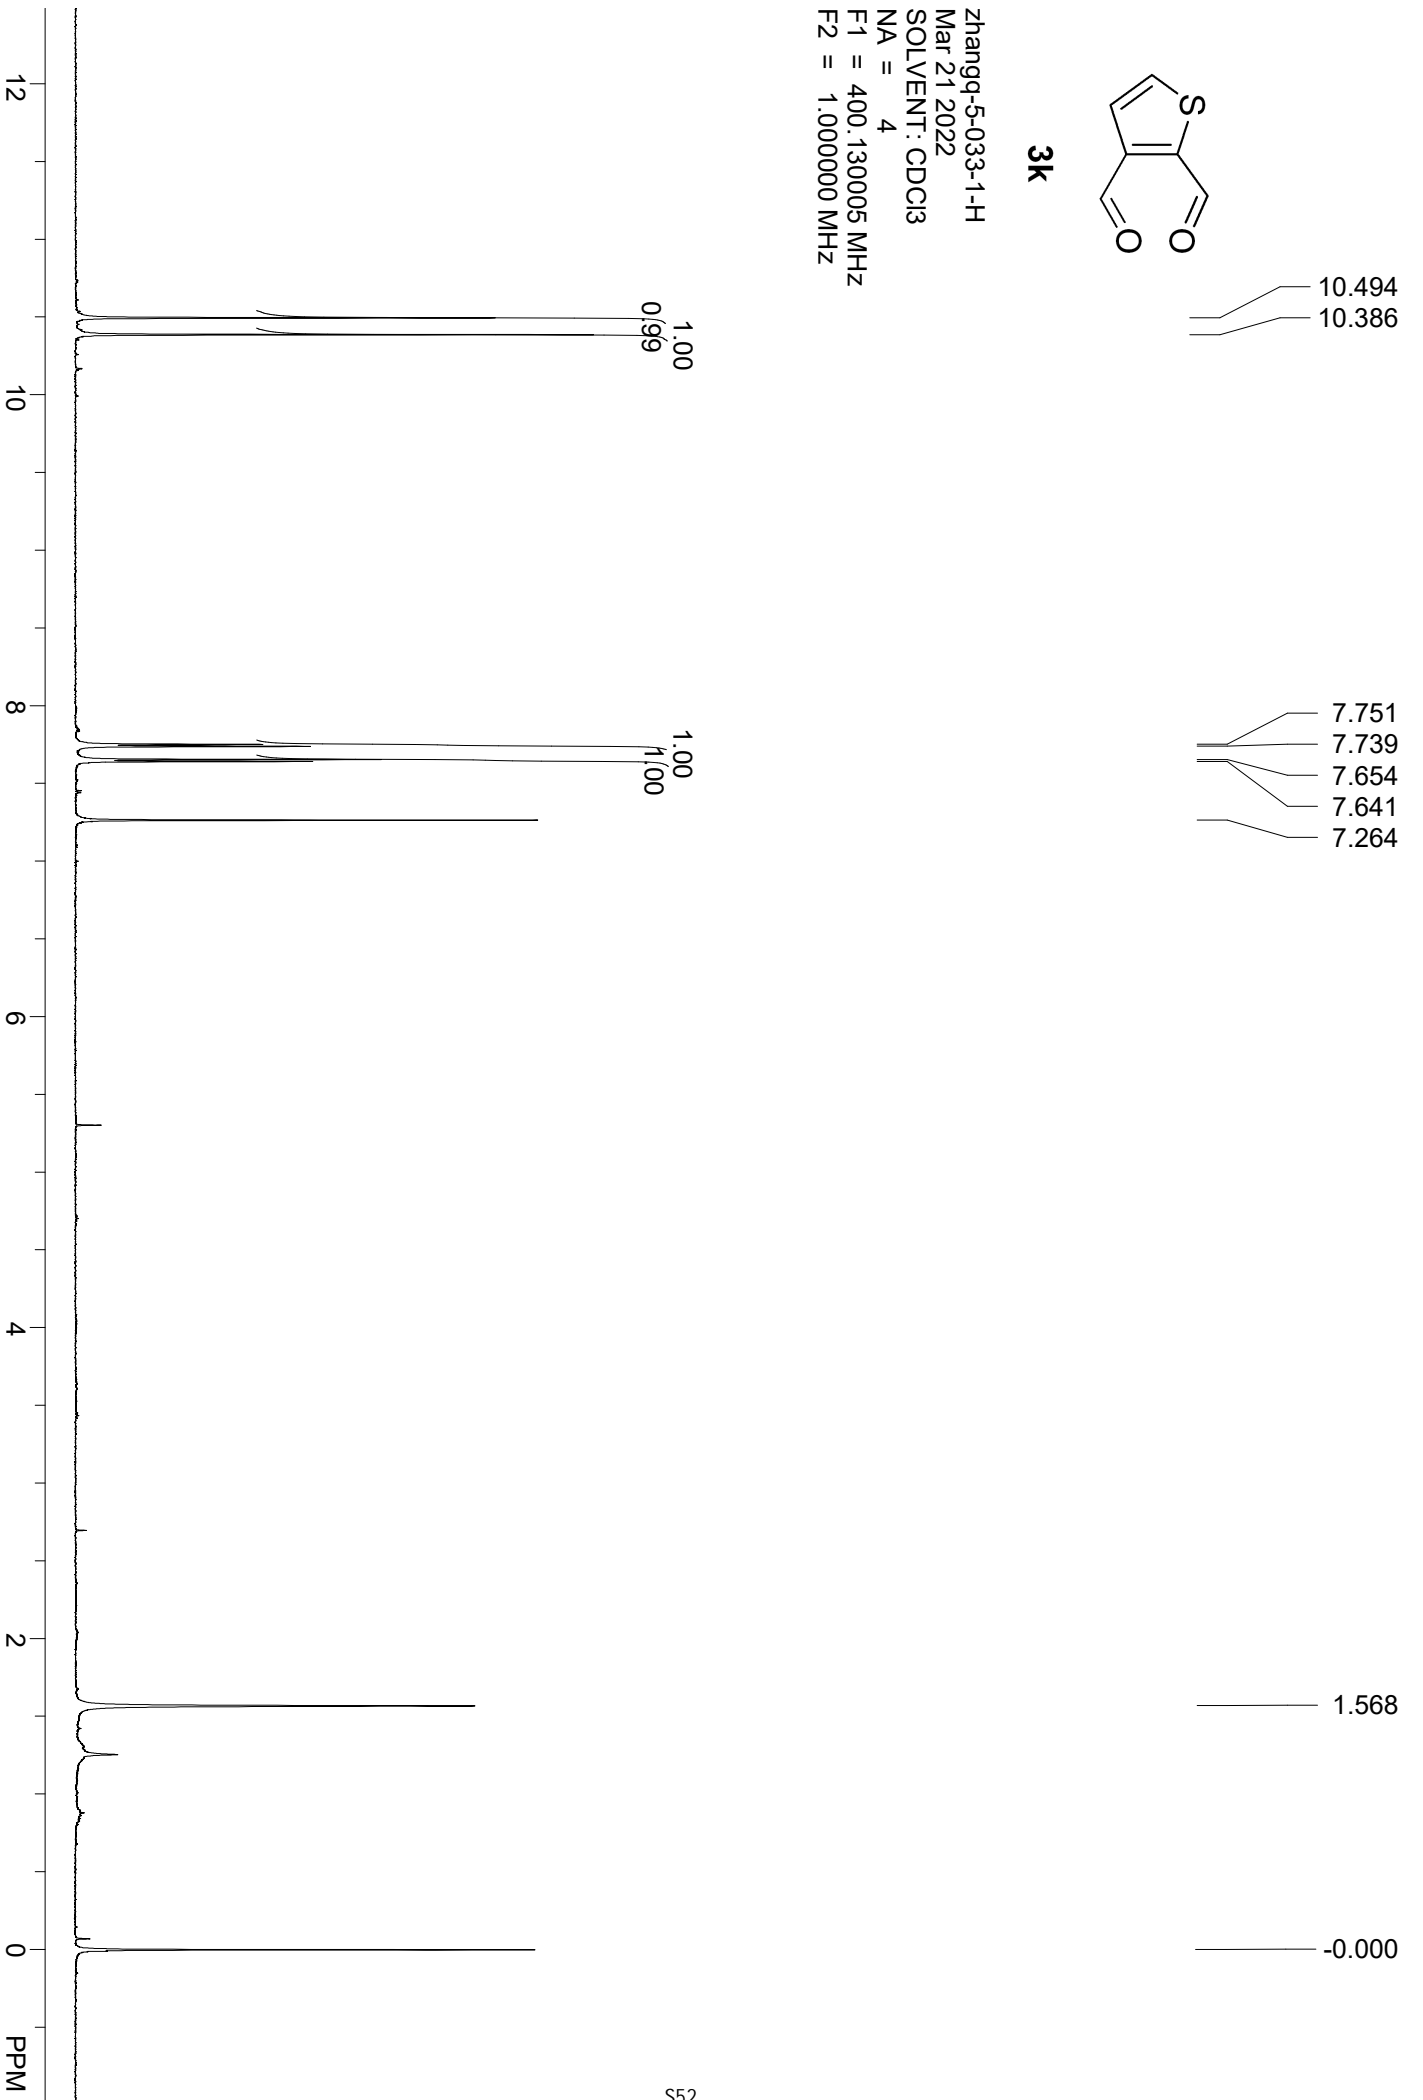

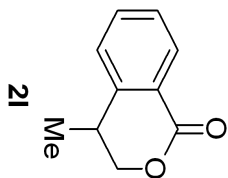

Zhangq-4-046-H  
 Oct 06 2021  
 SOLVENT: CDCl3  
 NA = 4  
 F1 = 400.130005 MHz  
 F2 = 1.000000 MHz

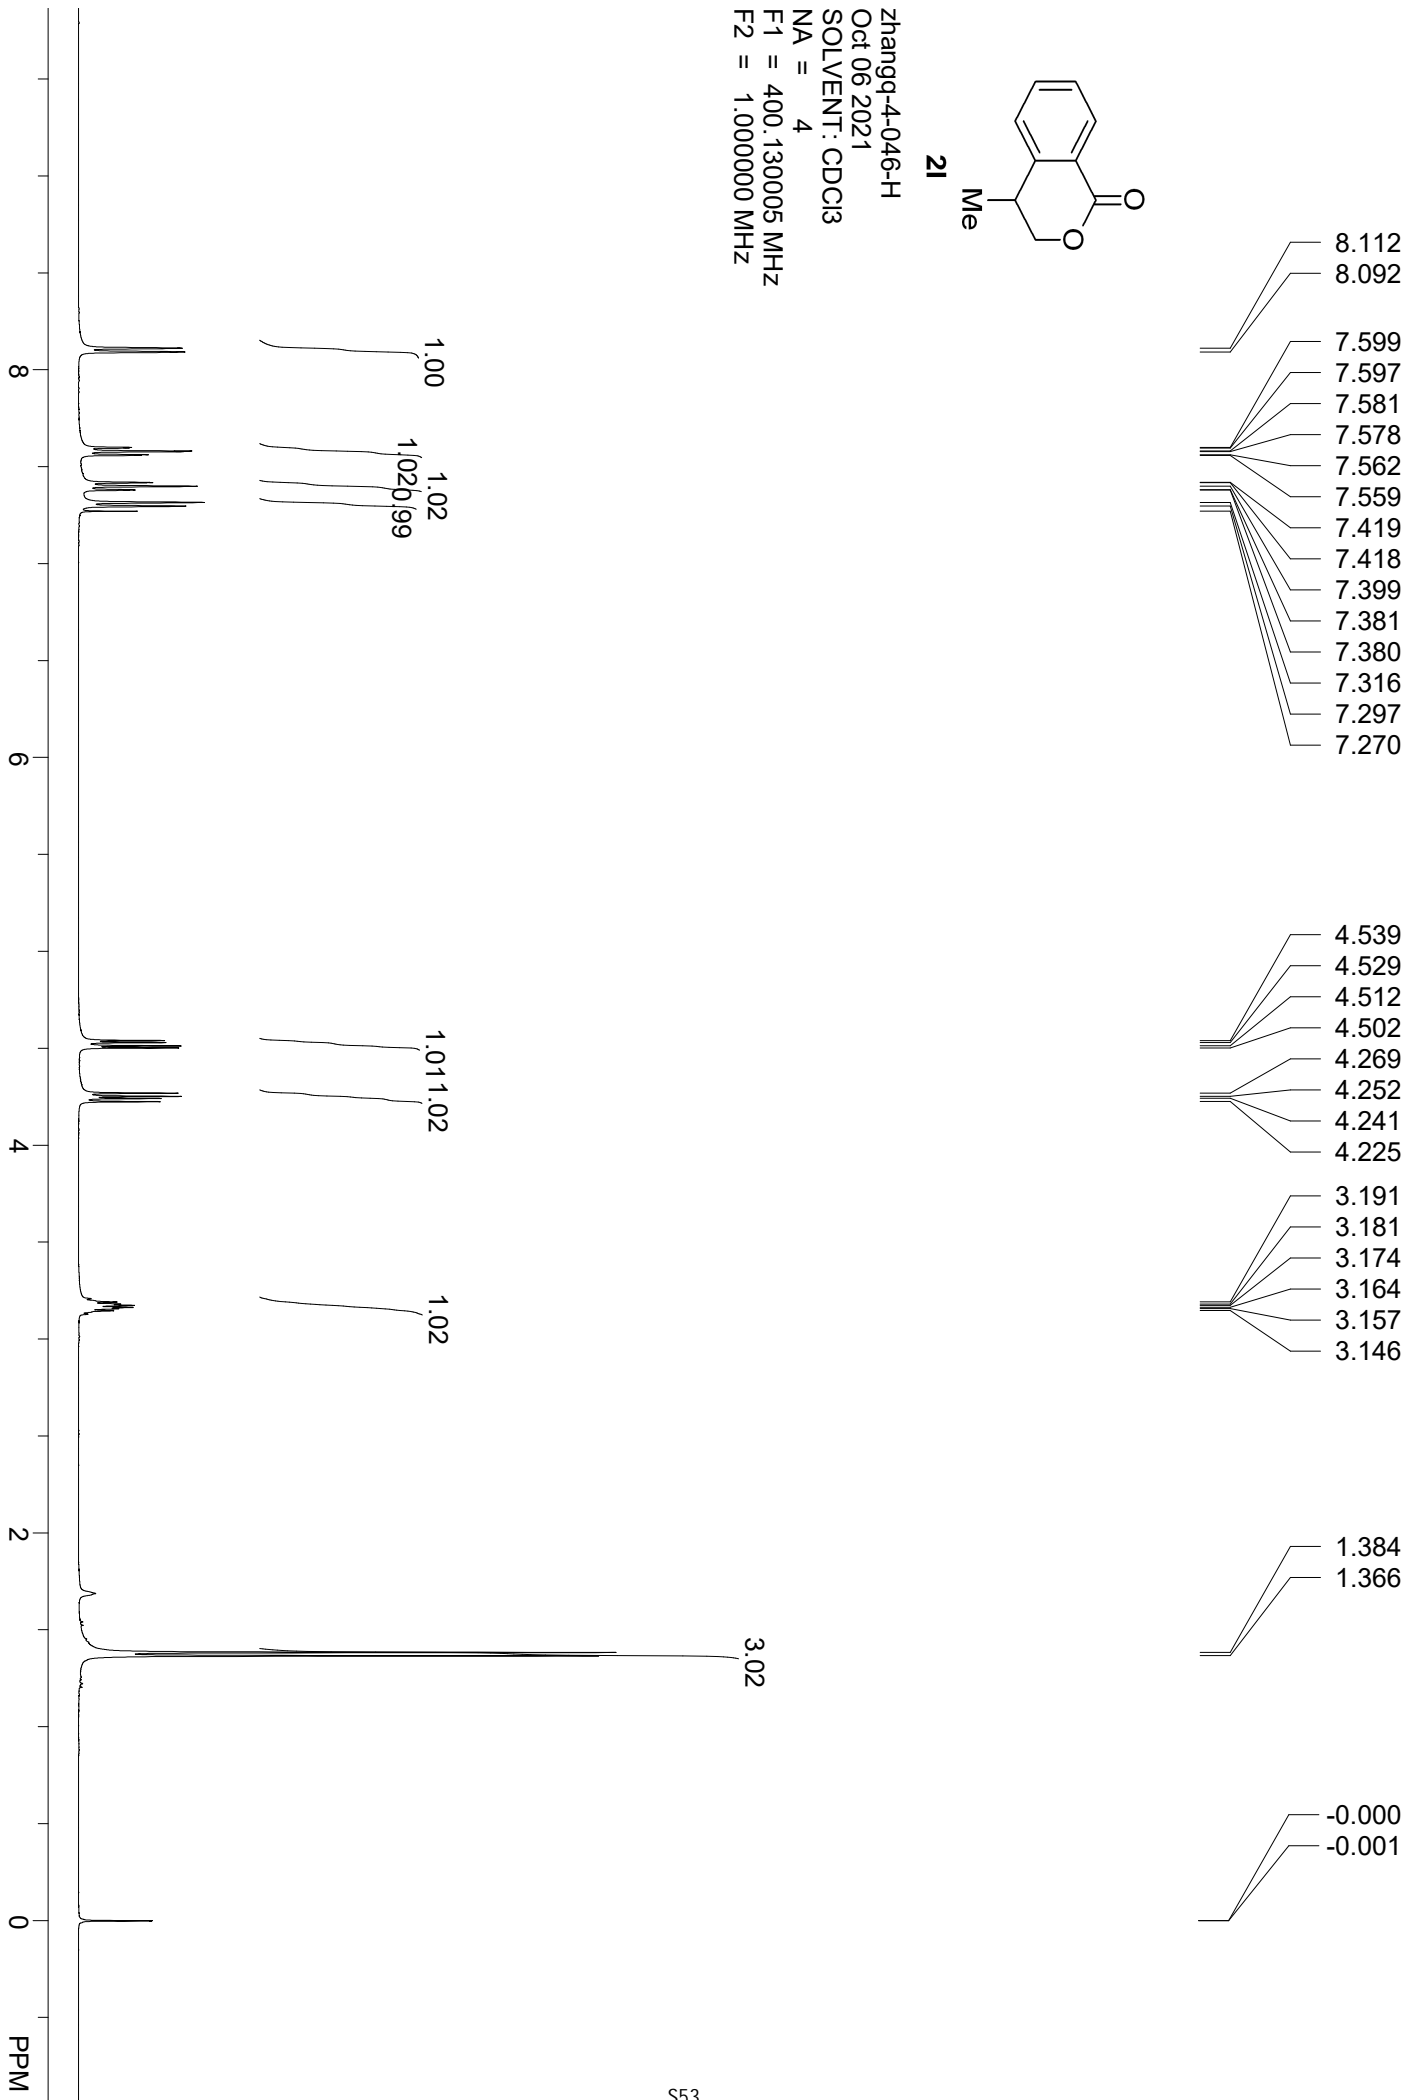

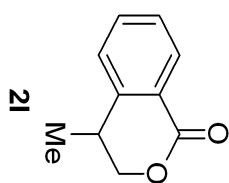

zhangq-4-046-C  
Oct 06 2021  
SOLVENT: CDC13  
NA = 200  
F1 = 100.612770 MHz  
F2 = 1.000000 MHz

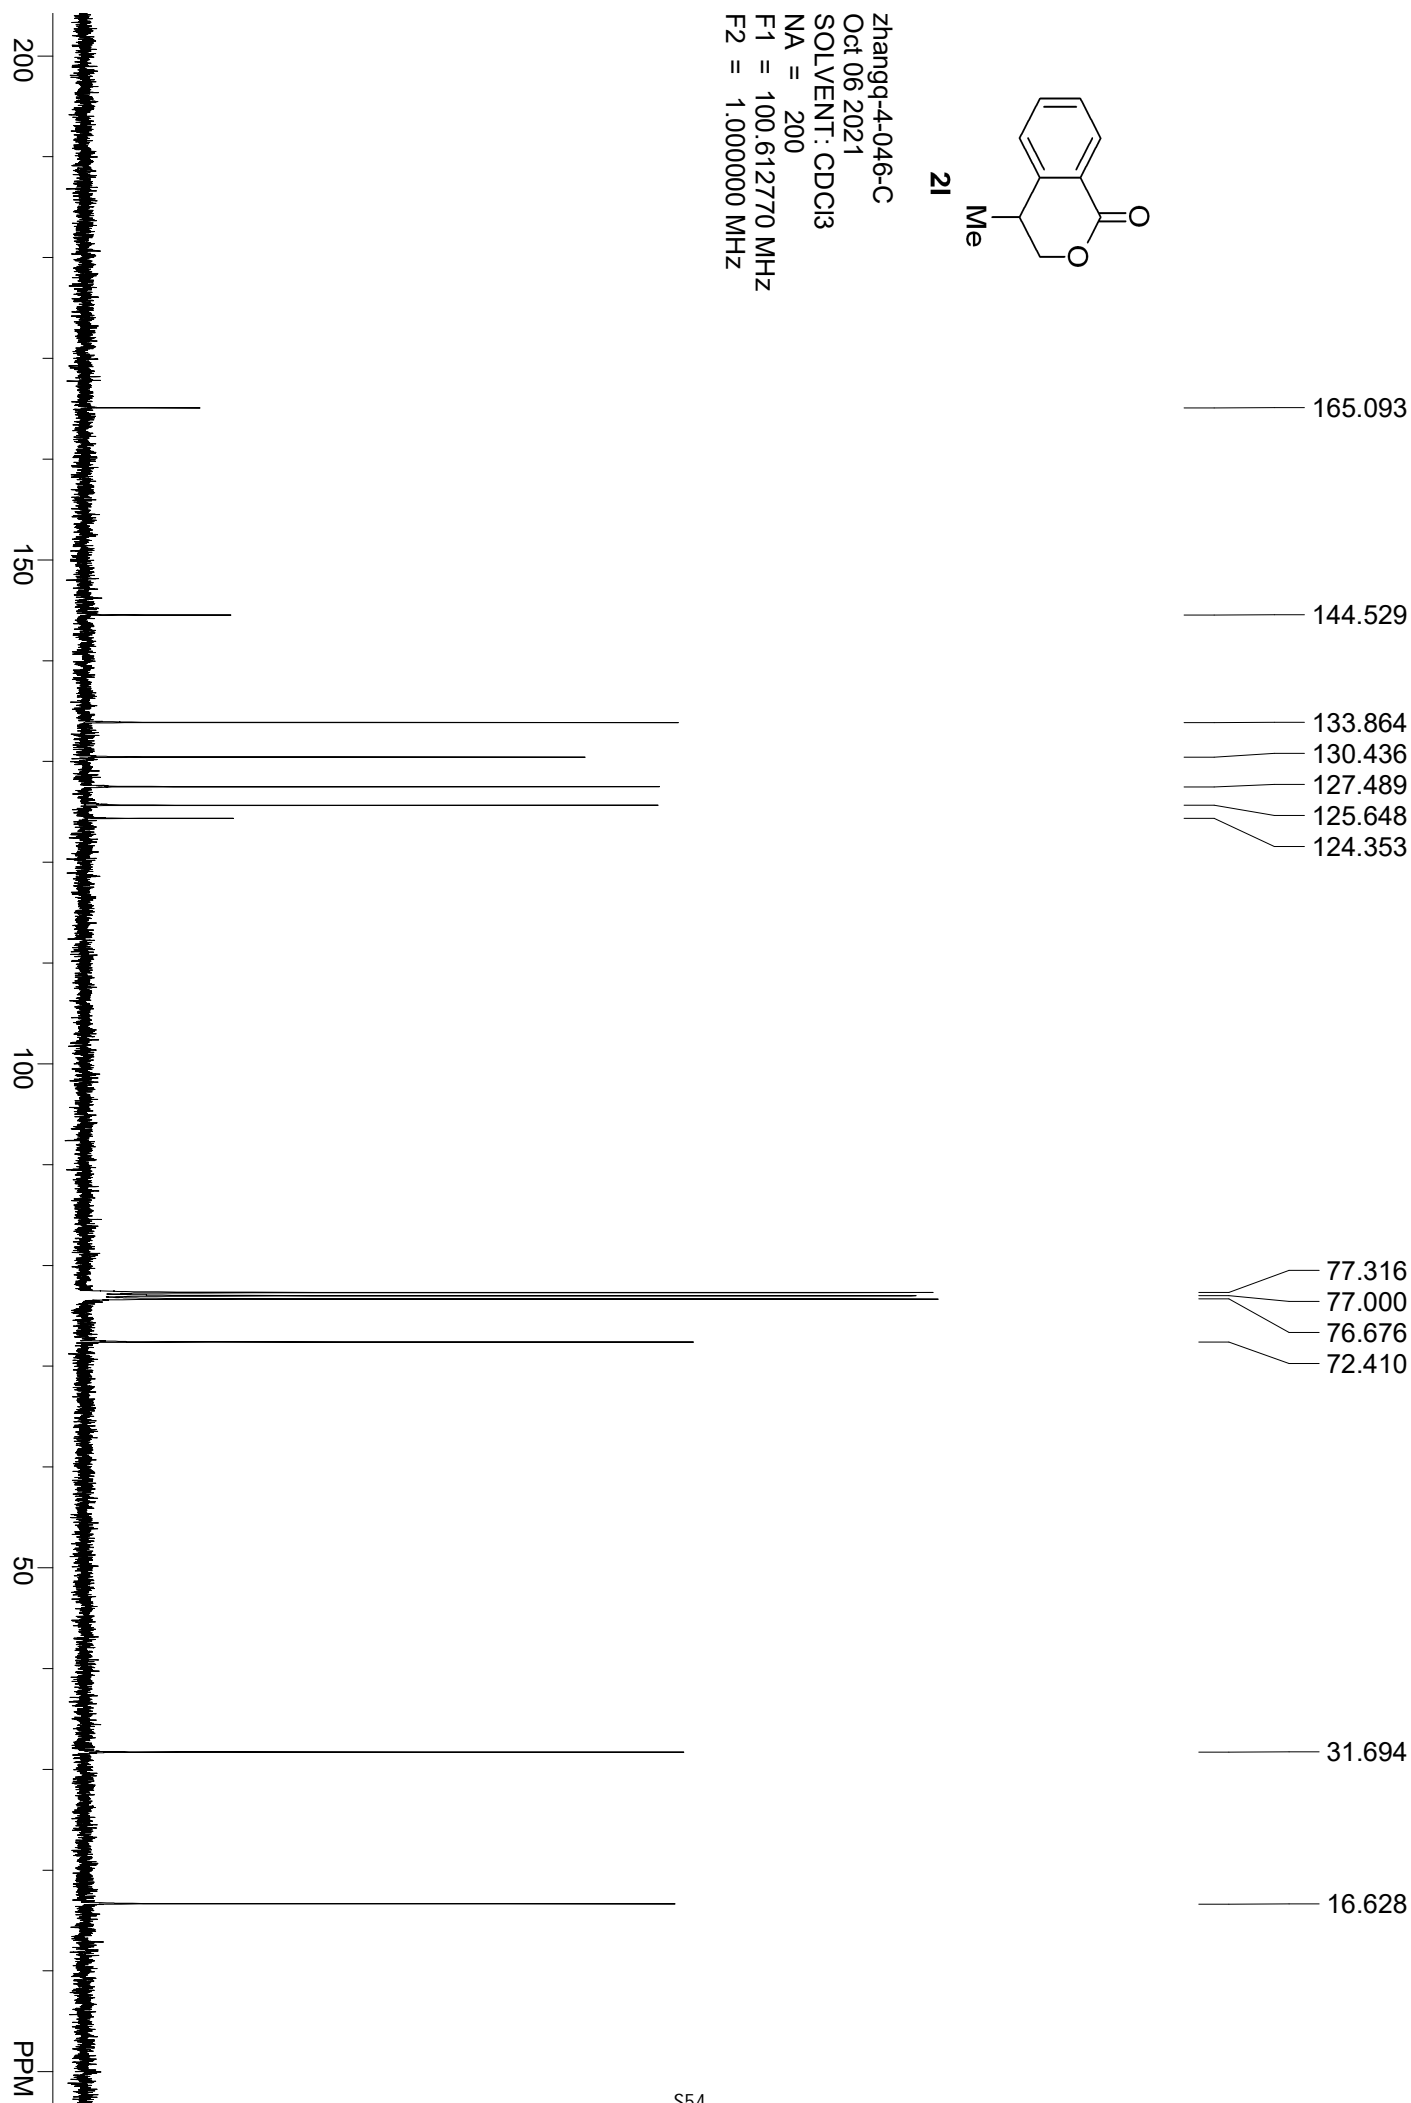

zhangq-4-047-H  
Jan 06 2023  
SOLVENT: CDCl3  
NA = 4  
F1 = 400.130005 MHz  
F2 = 1.000000 MHz

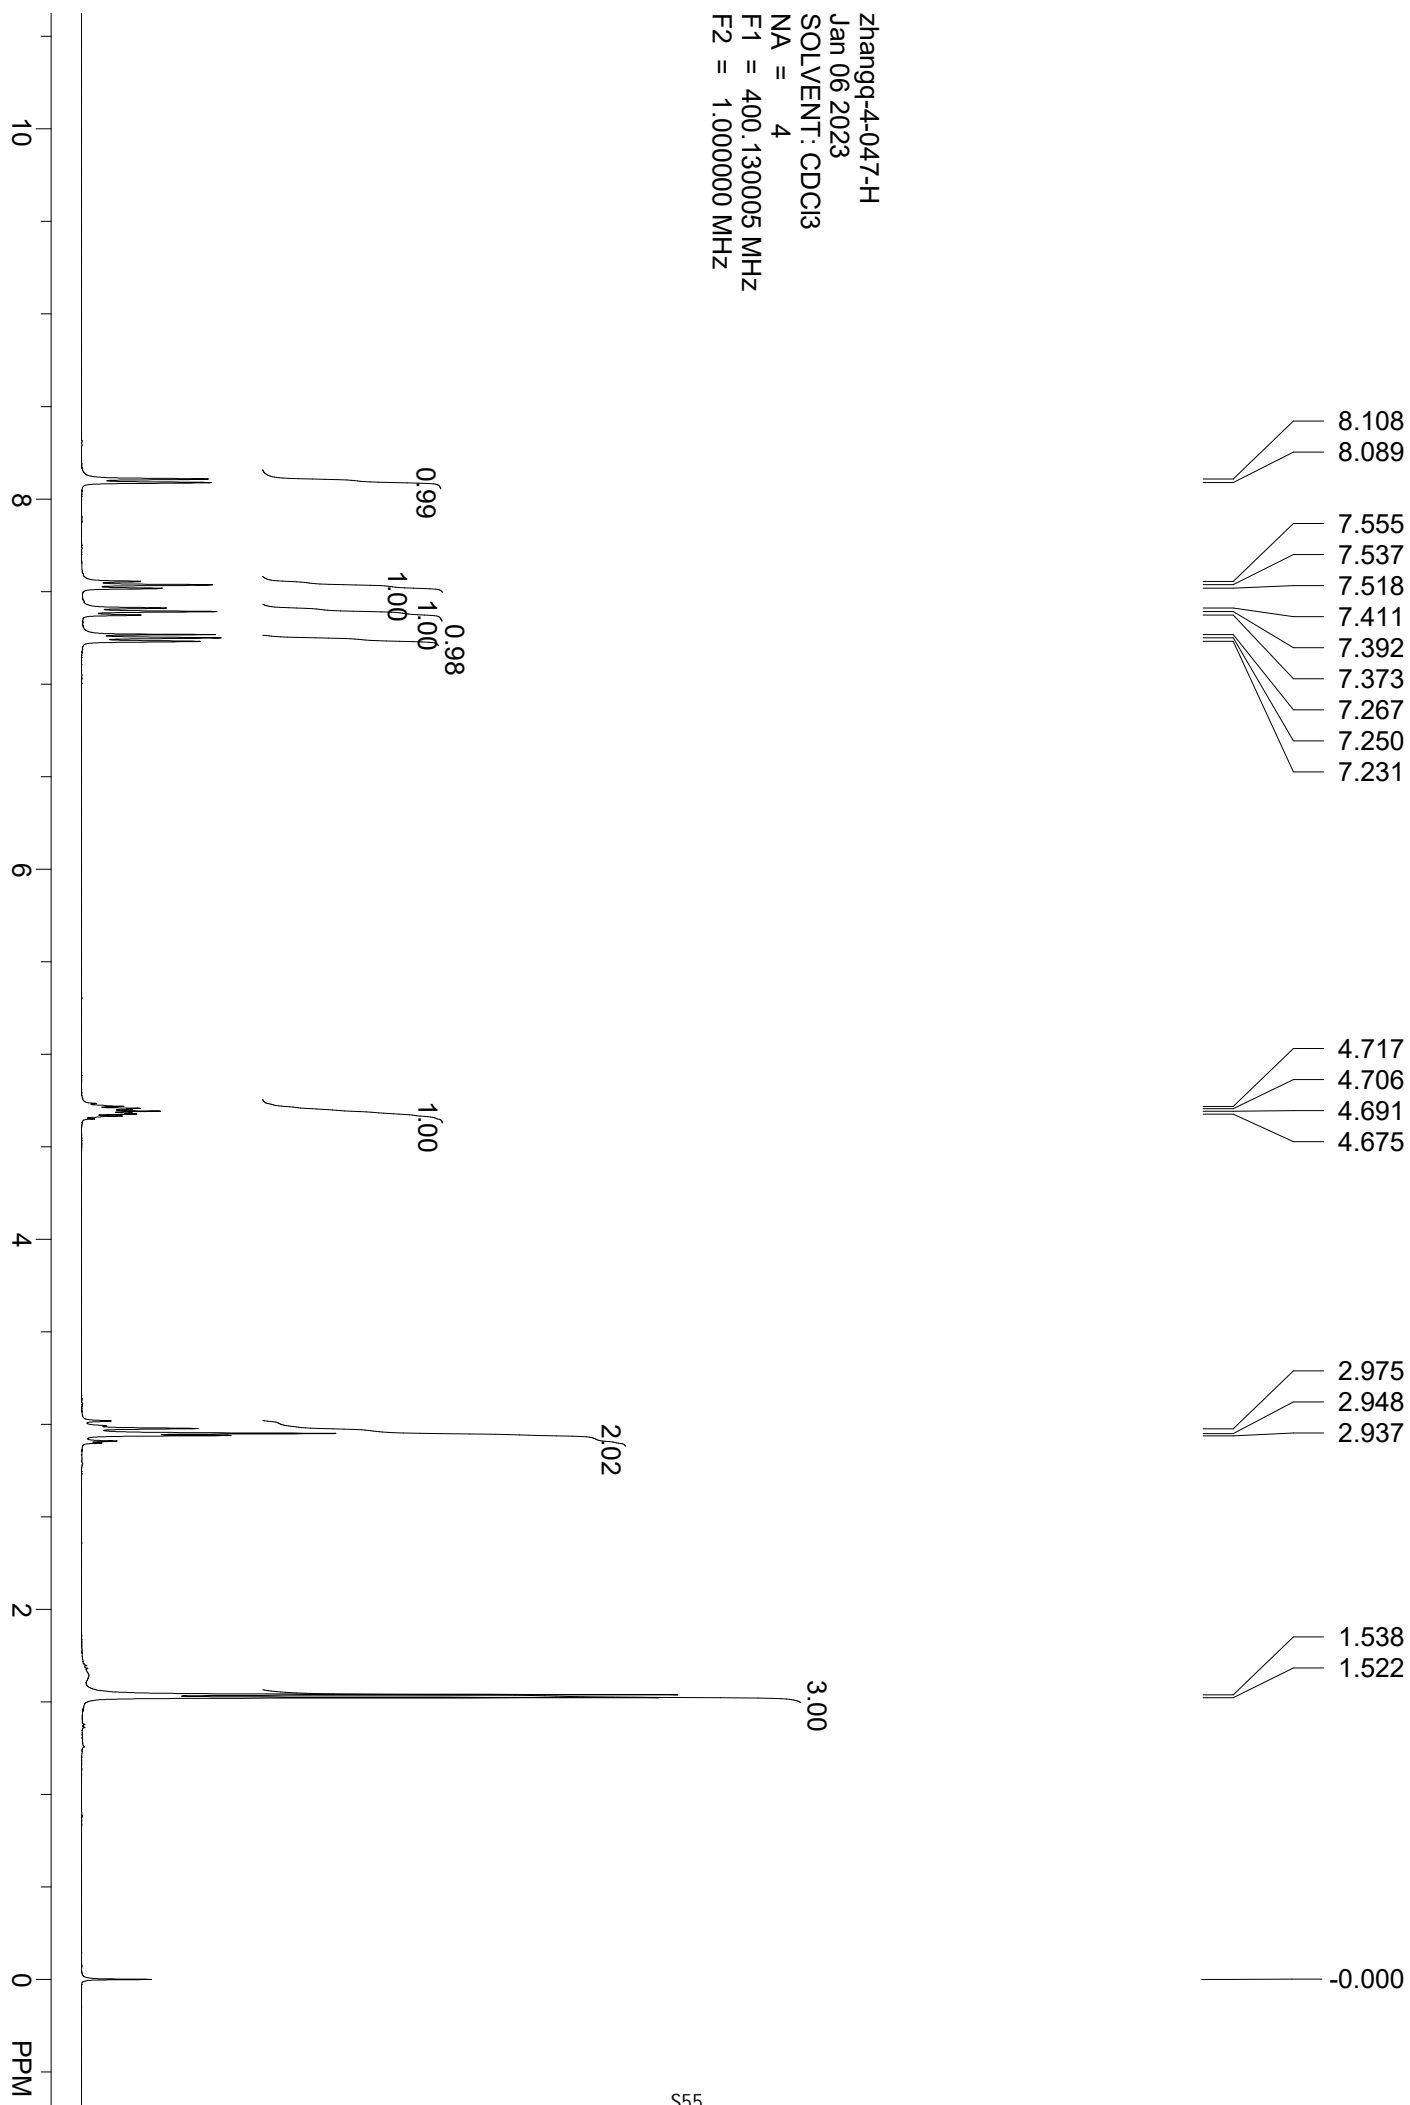

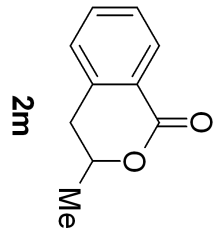

Zhangq-4-047-C  
Oct 06 2021  
SOLVENT: CDCl3  
NA = 200  
F1 = 100.612770 MHz  
F2 = 1.000000 MHz

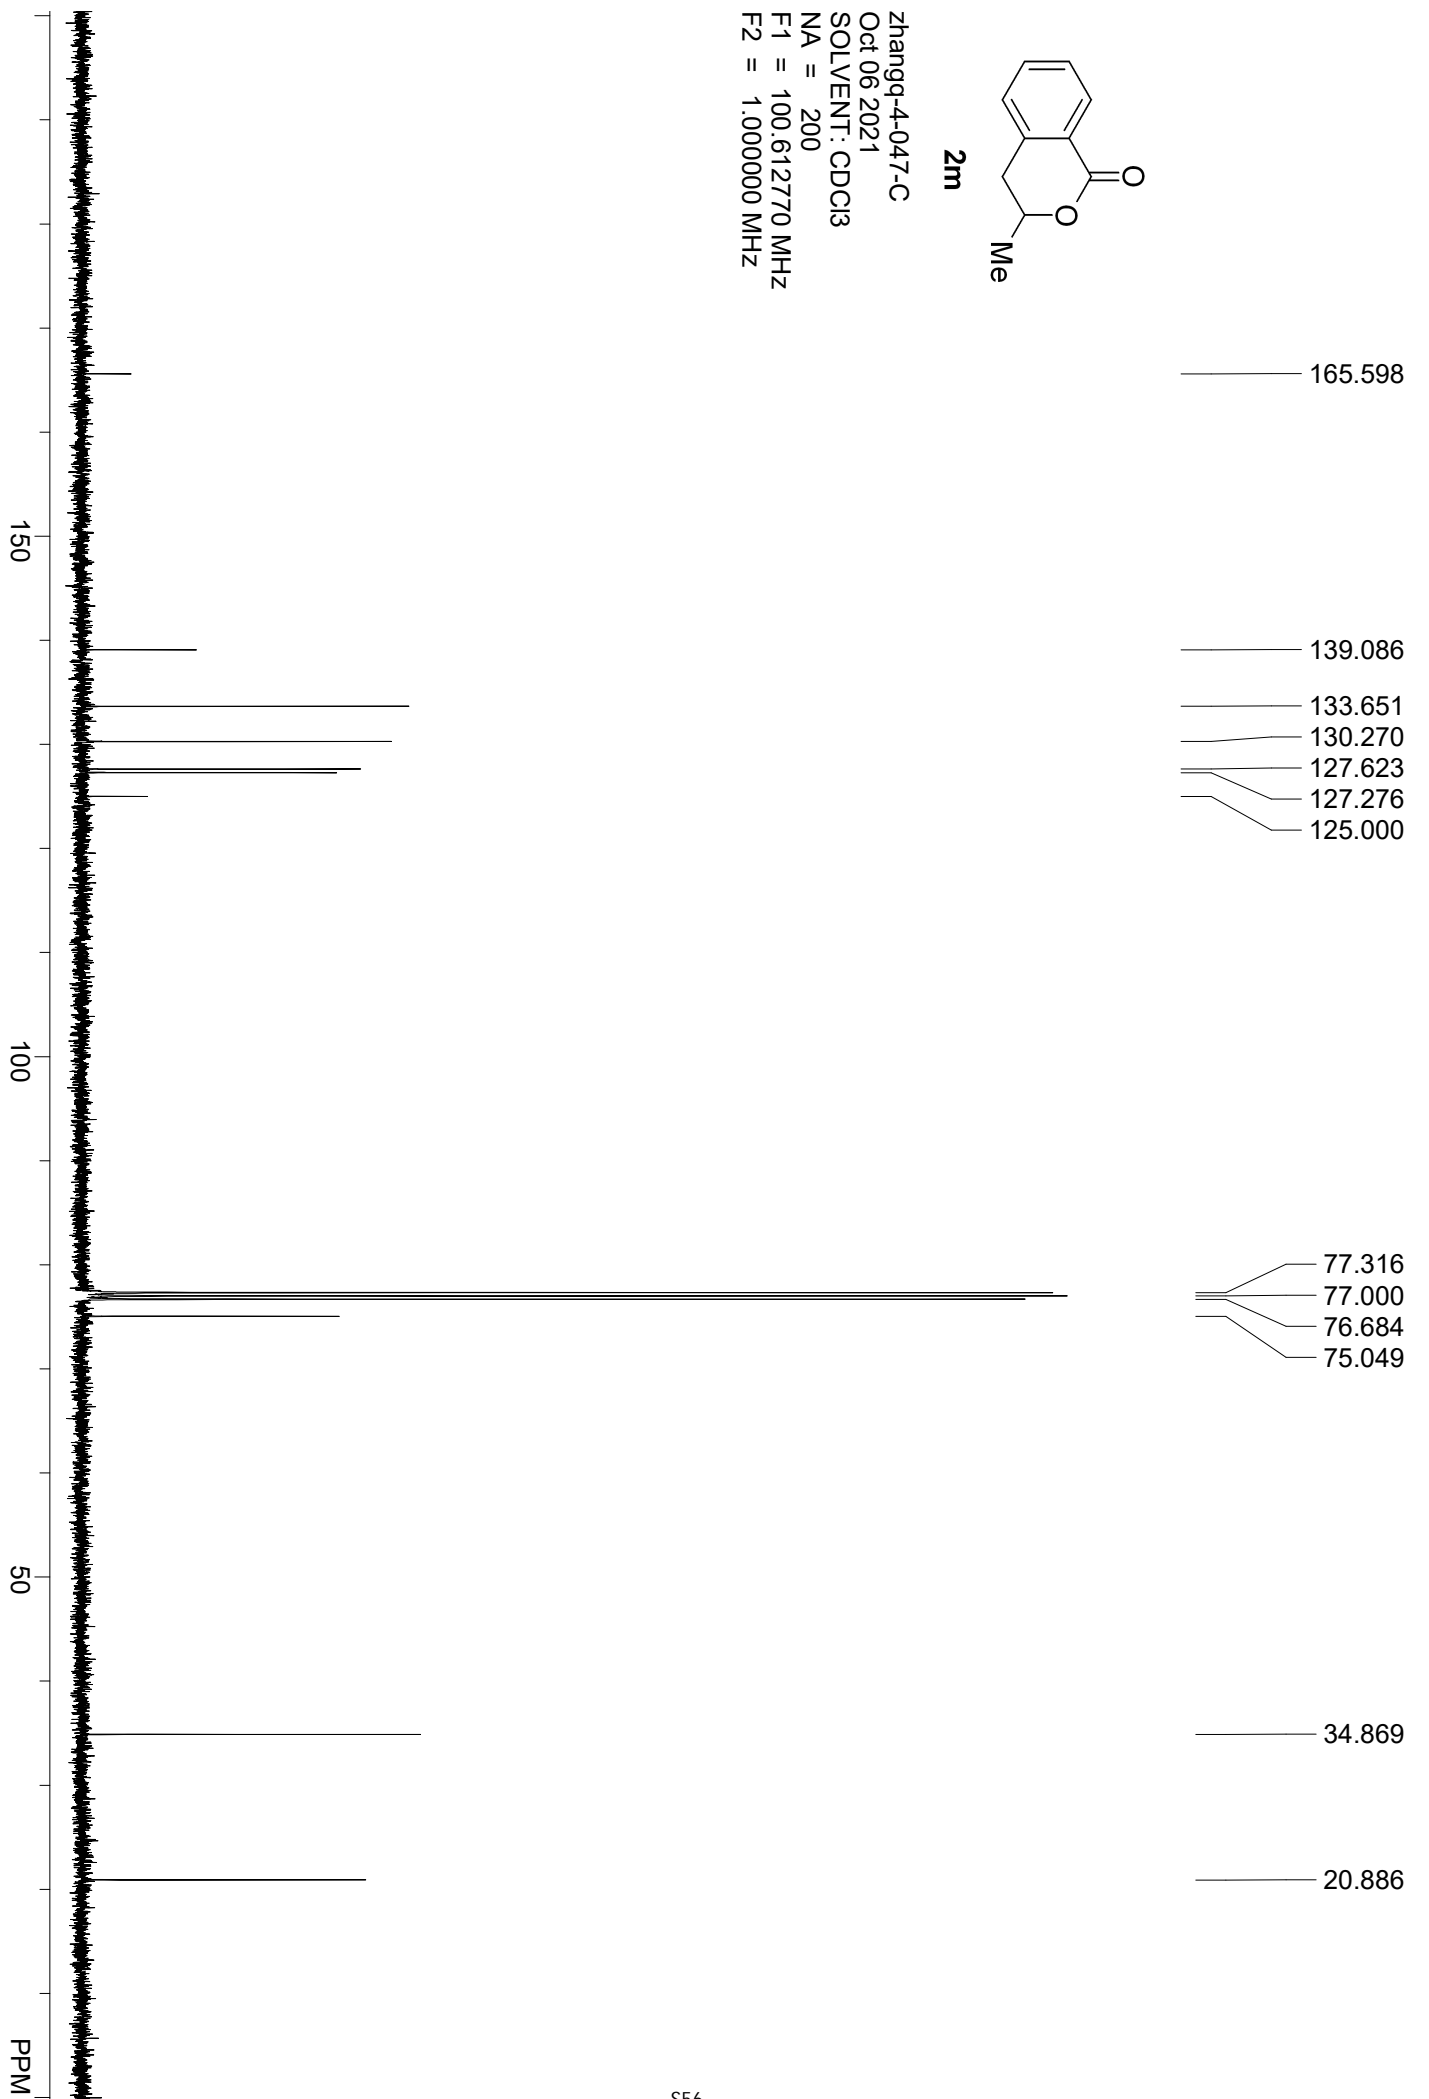



zhangq-5-080-H  
Jan 06 2023  
SOLVENT: CDCl3  
NA = 4  
F1 = 400.130005 MHz  
F2 = 1.000000 MHz

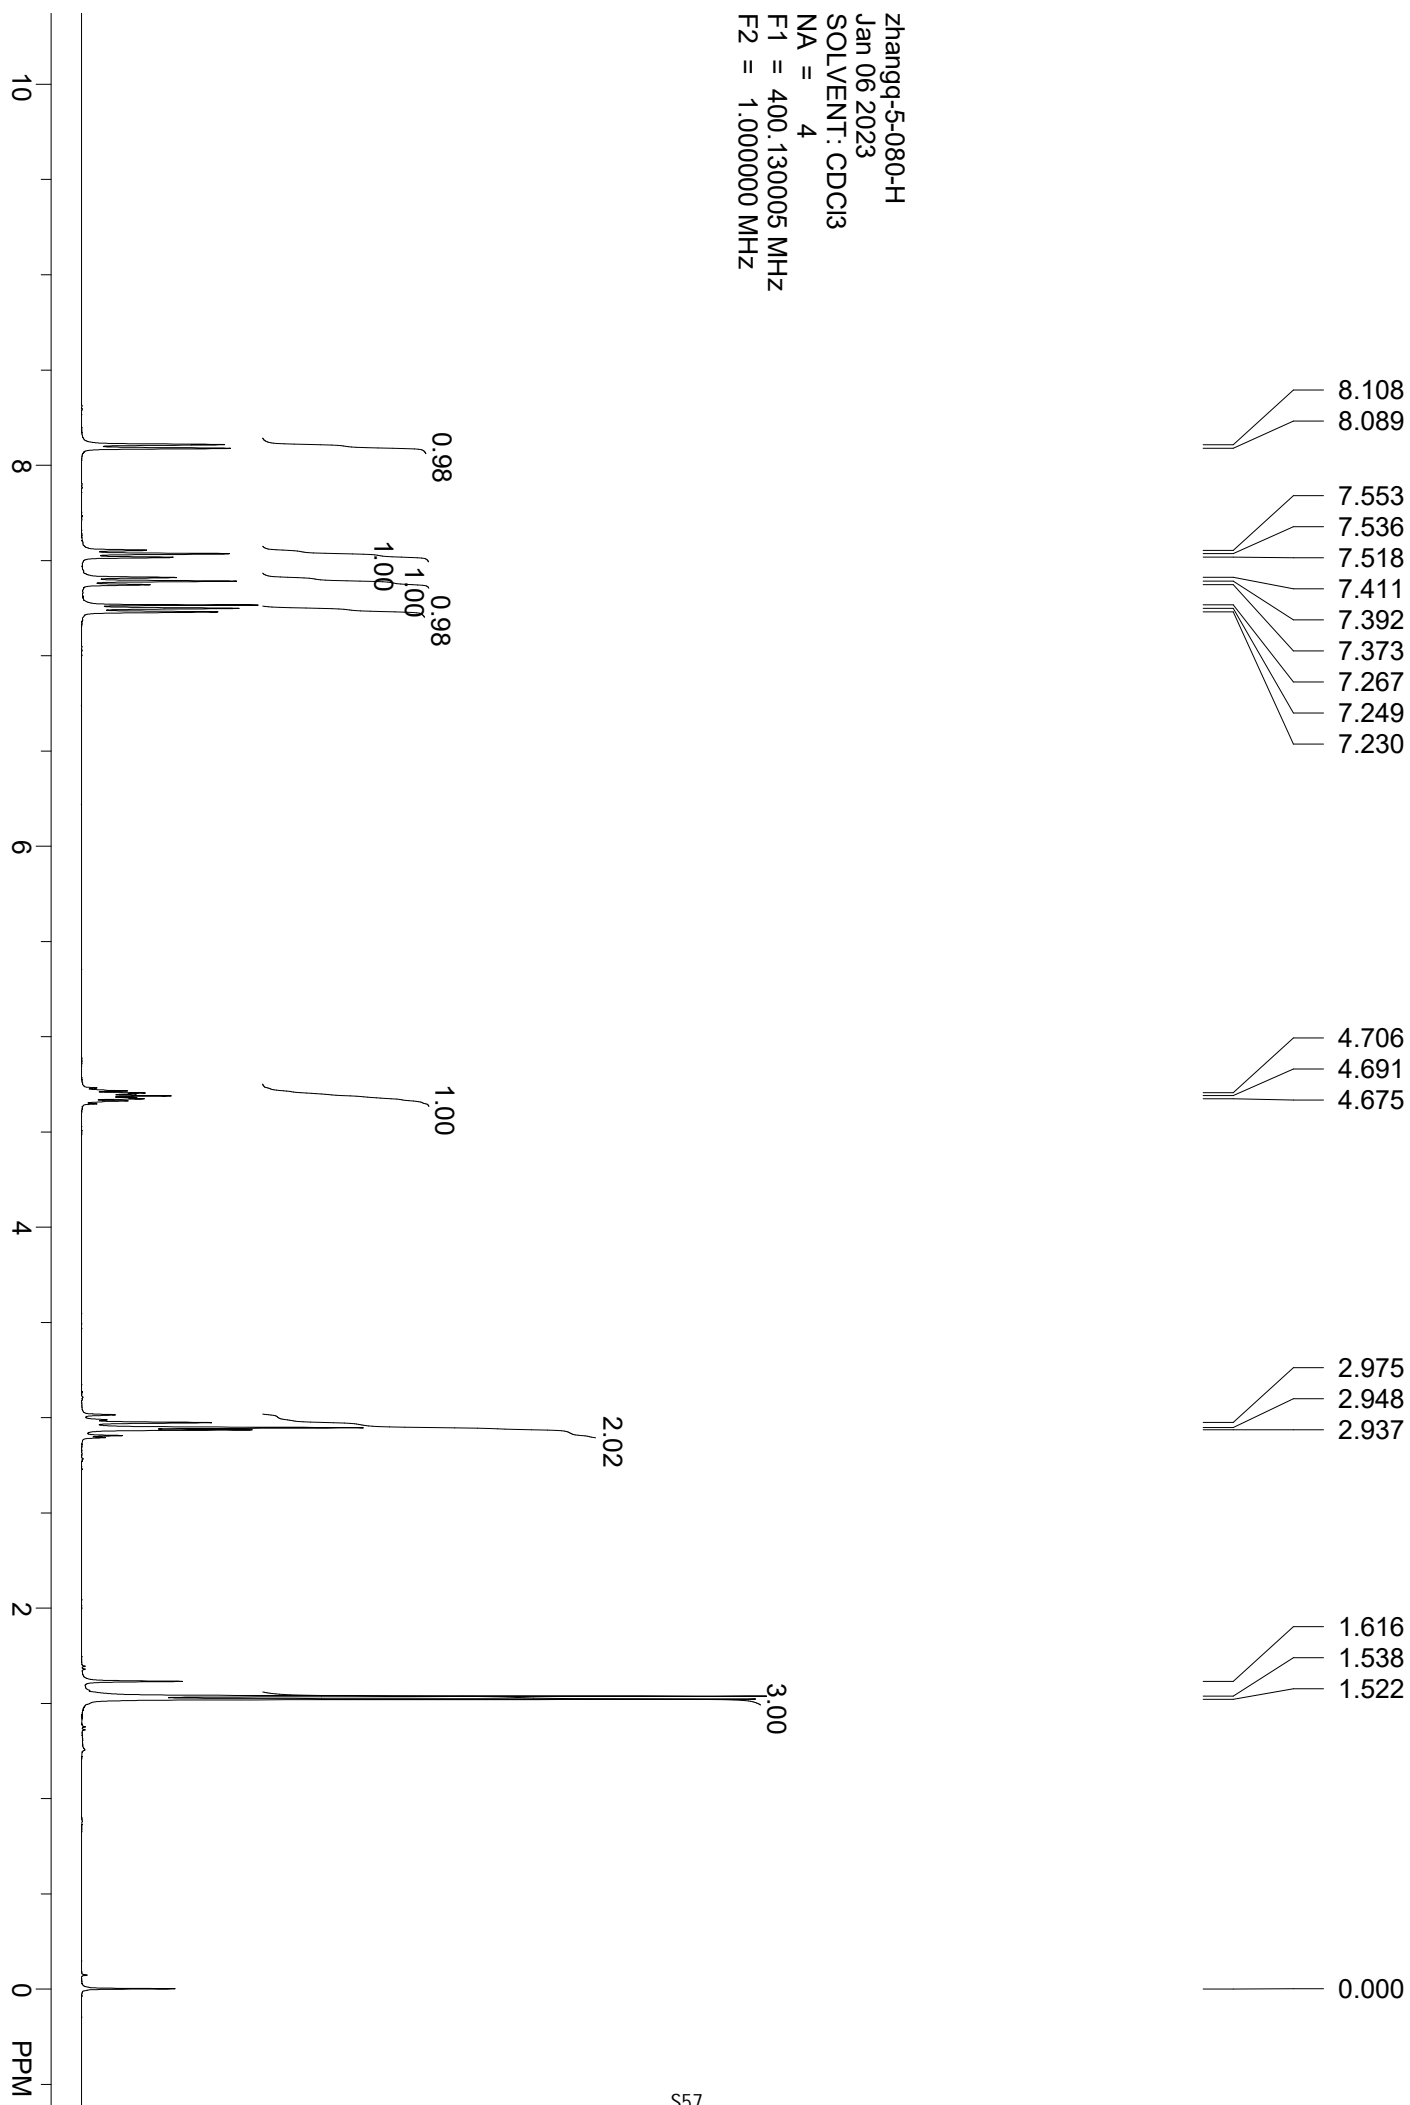

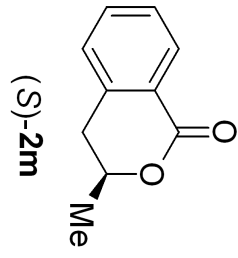

Zhangq-5-080-C  
Jun 23 2022  
SOLVENT: CDCl3  
NA = 64  
F1 = 100.612770 MHz  
F2 = 1.000000 MHz

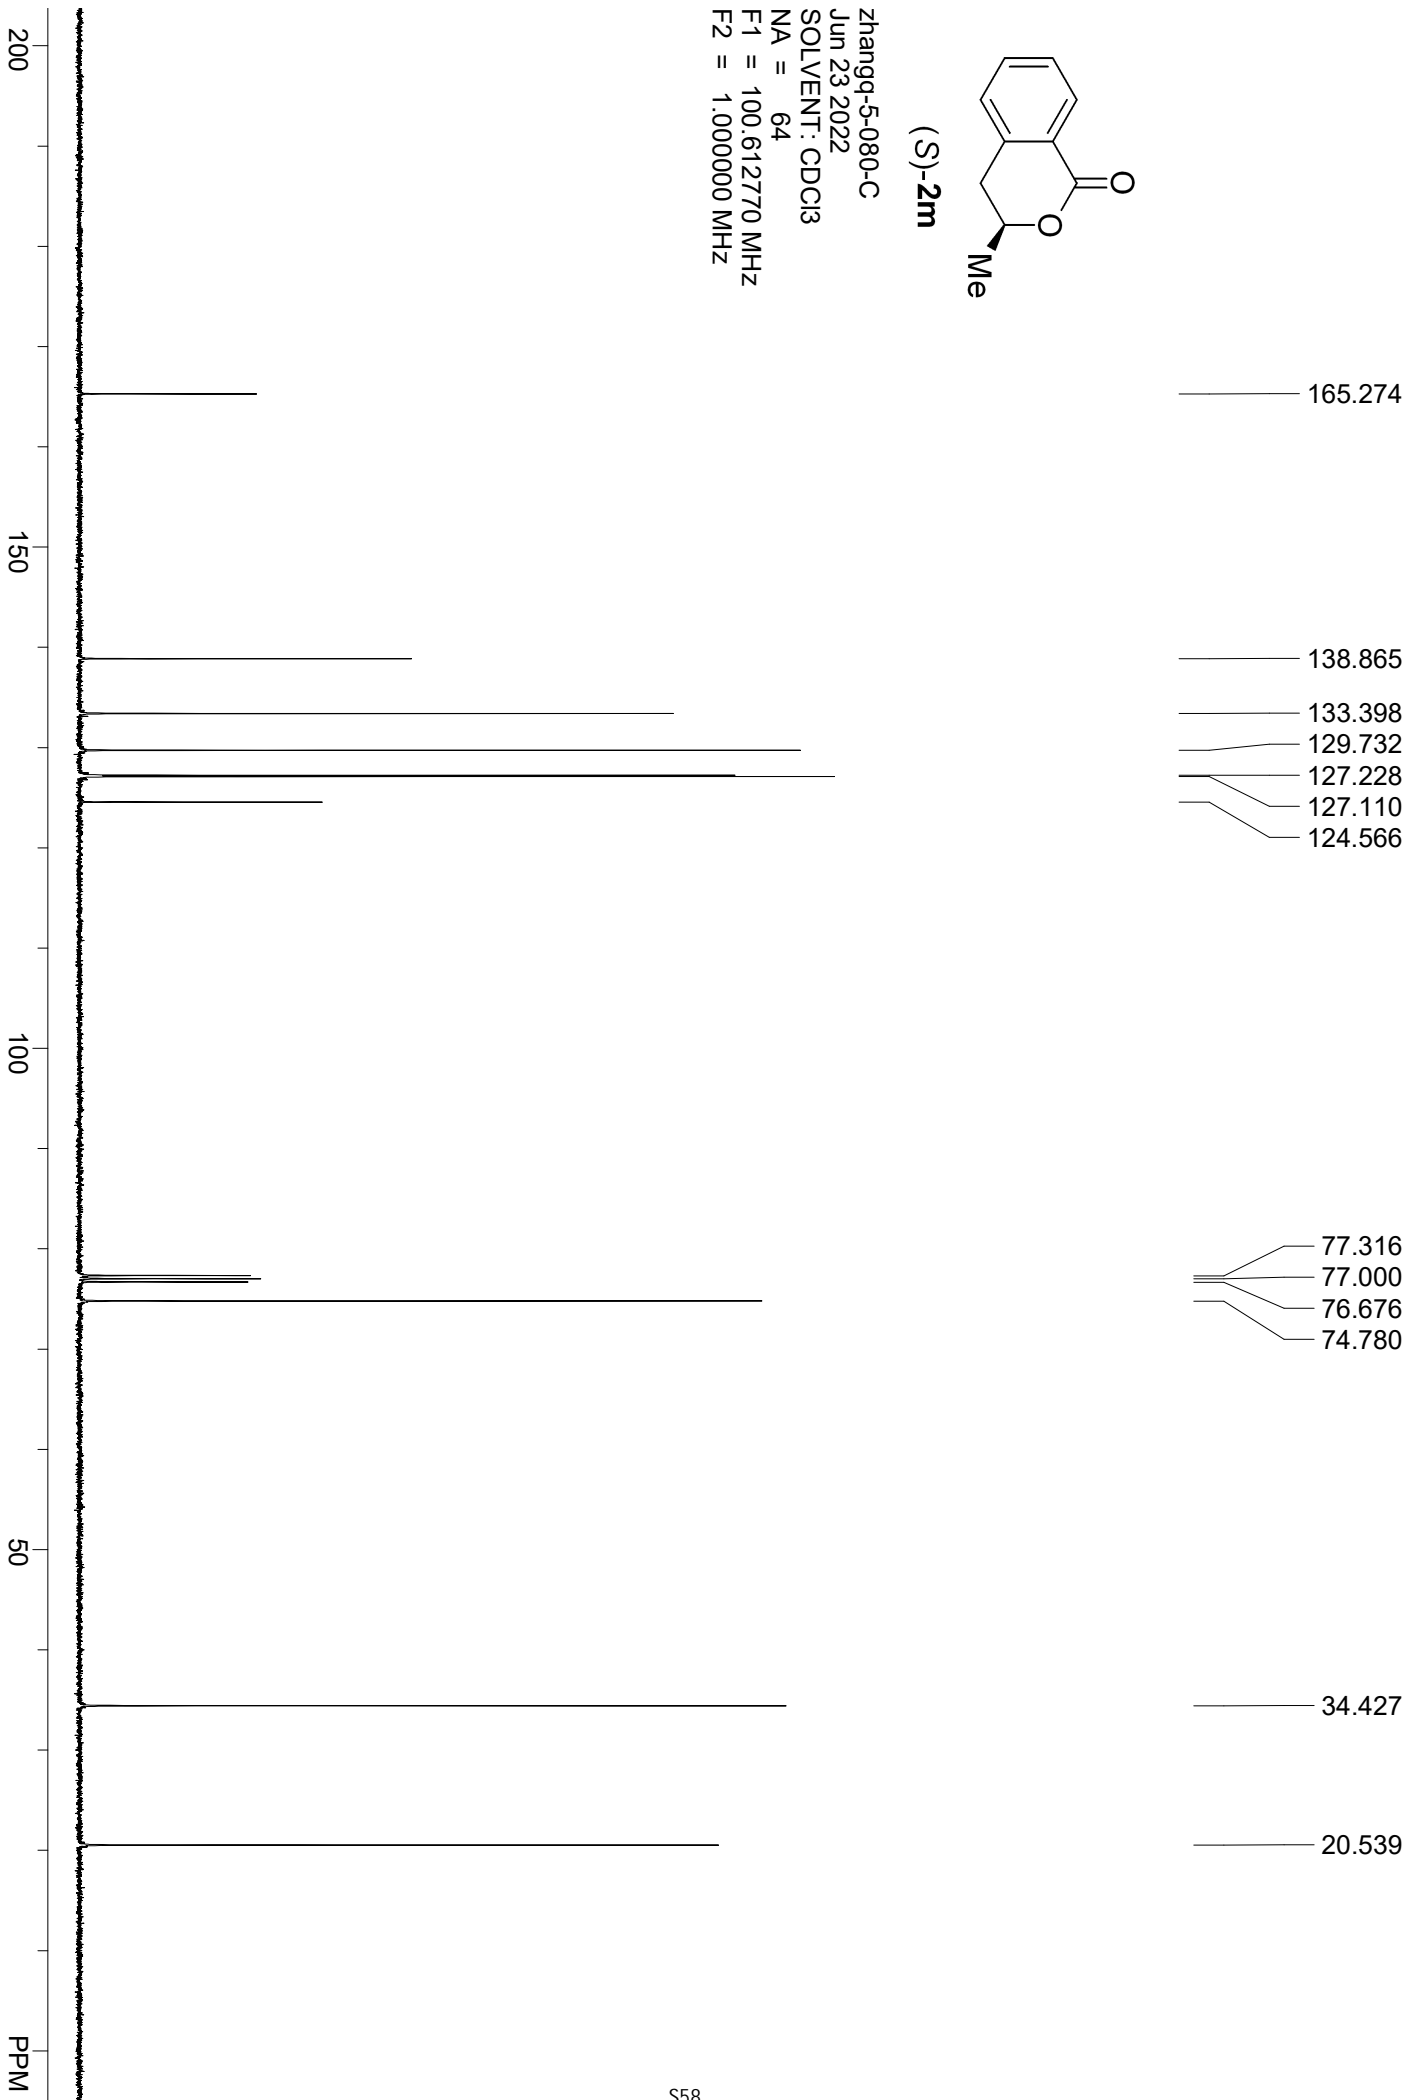

# Area Percent Report

sample zhangq-4-047-rac-AS-H-80-20  
-1.0-214

Data file: C:\Users\Public\Documents\ChemStation\1\Data\zhangq 2022-06-23 20-03-33\004-P2-D1-zhangq  
-4-047-rac.D

Acquisition Data:

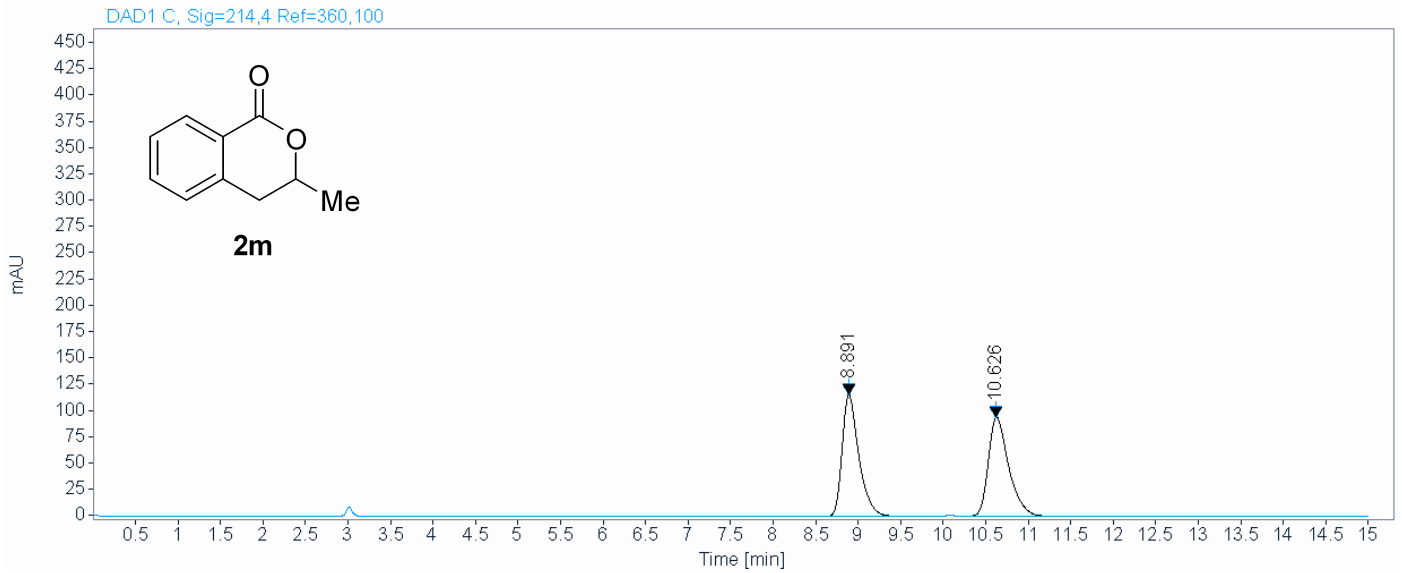

Signal: DAD1 C, Sig=214,4 Ref=360,100

| RT [min] | Width [min] | Height   | Area      | Area%    |
|----------|-------------|----------|-----------|----------|
| 8.891    | 0.2058      | 115.9376 | 1588.4351 | 50.3251  |
| 10.626   | 0.2503      | 94.1655  | 1567.9149 | 49.6749  |
|          |             | Sum      | 3156.3500 | 100.0000 |

# Area Percent Report

sample zhangq-5-080-AS-H-80-20-1.0  
-214

Data file: C:\Users\Public\Documents\ChemStation\1\Data\zhangq 2022-06-23 20-03-33\003-P2-D2-zhangq-5-080.D

Acquisition Data:

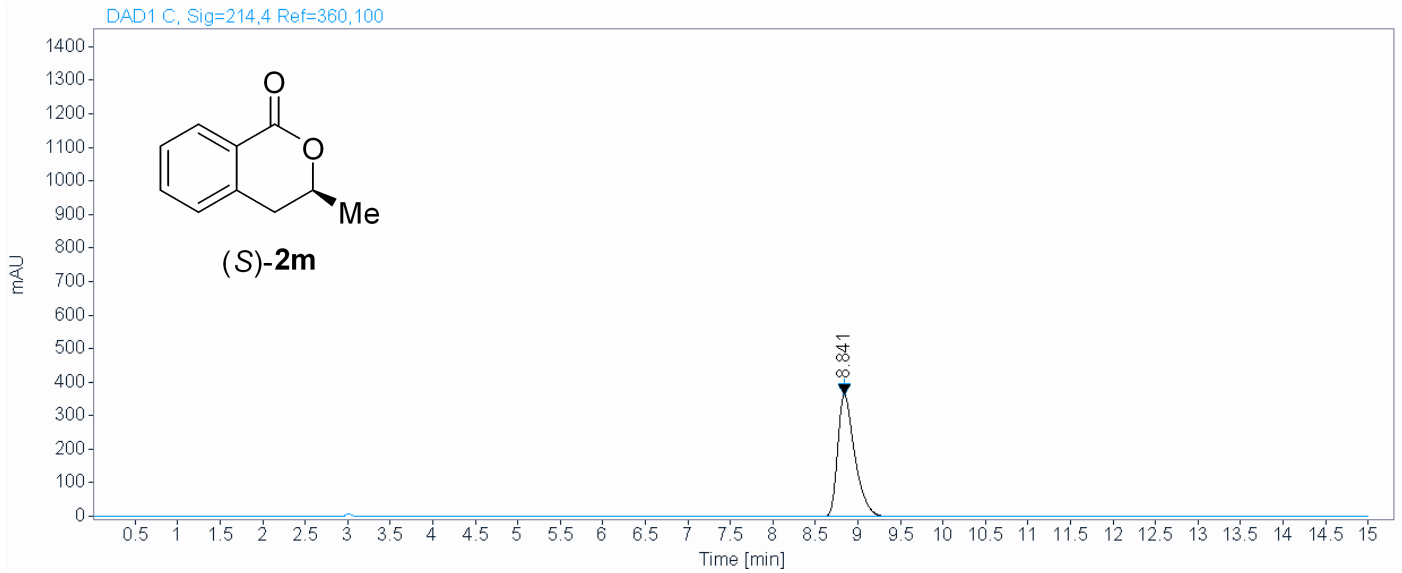

Signal: DAD1 C, Sig=214,4 Ref=360,100

| RT [min] | Width [min] | Height   | Area      | Area%    |
|----------|-------------|----------|-----------|----------|
| 8.841    | 0.2113      | 364.2062 | 5096.8960 | 100.0000 |
|          |             | Sum      | 5096.8960 | 100.0000 |

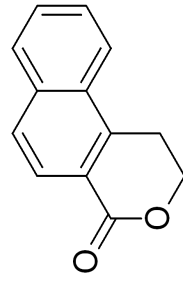

**2n**

Zhangq-4-045-H  
 Sep 27 2021  
 SOLVENT: CDCl3  
 NA = 4  
 F1 = 400.130005 MHz  
 F2 = 1.000000 MHz

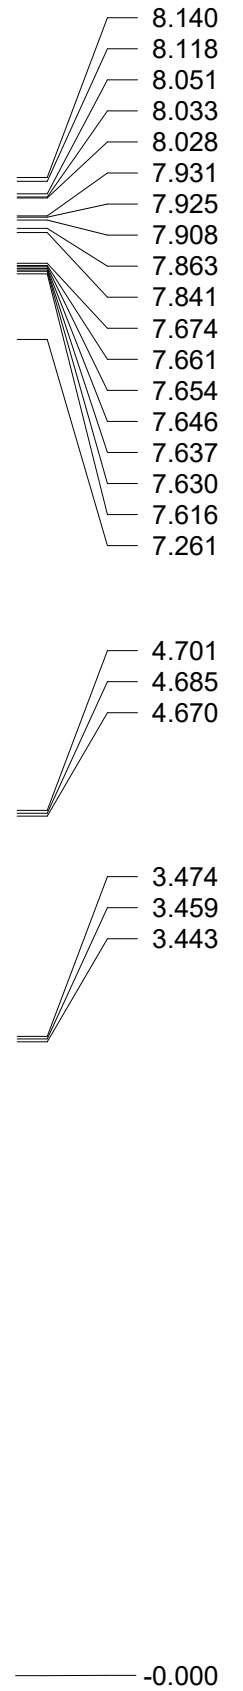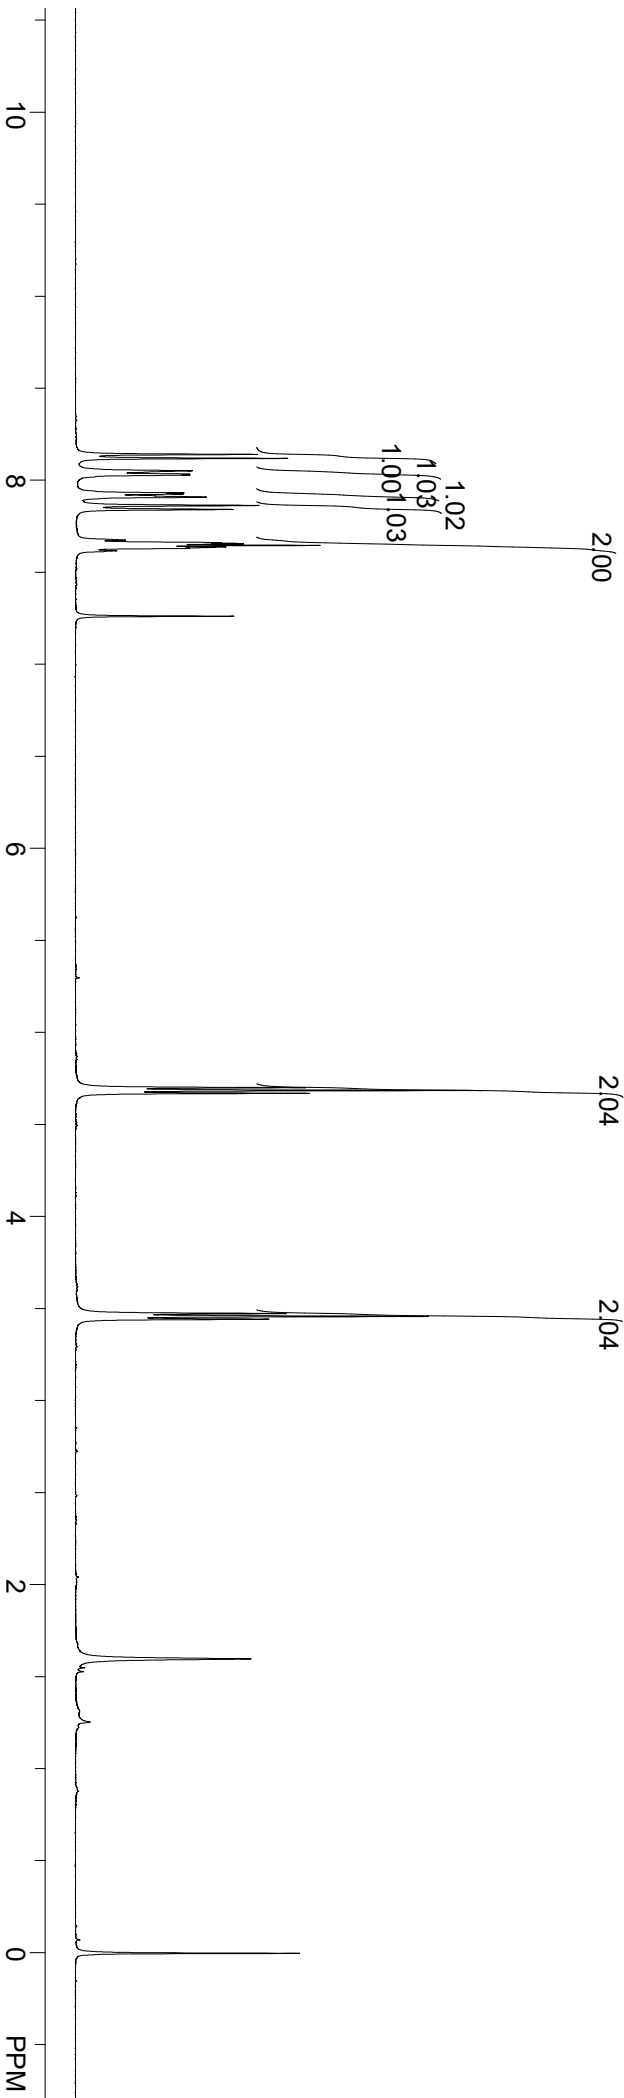

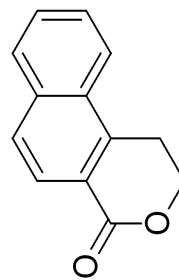

**2n**

Zhangq-4-045-C  
Sep 27 2021  
SOLVENT: CDCl3  
NA = 32  
F1 = 100.612770 MHz  
F2 = 1.000000 MHz

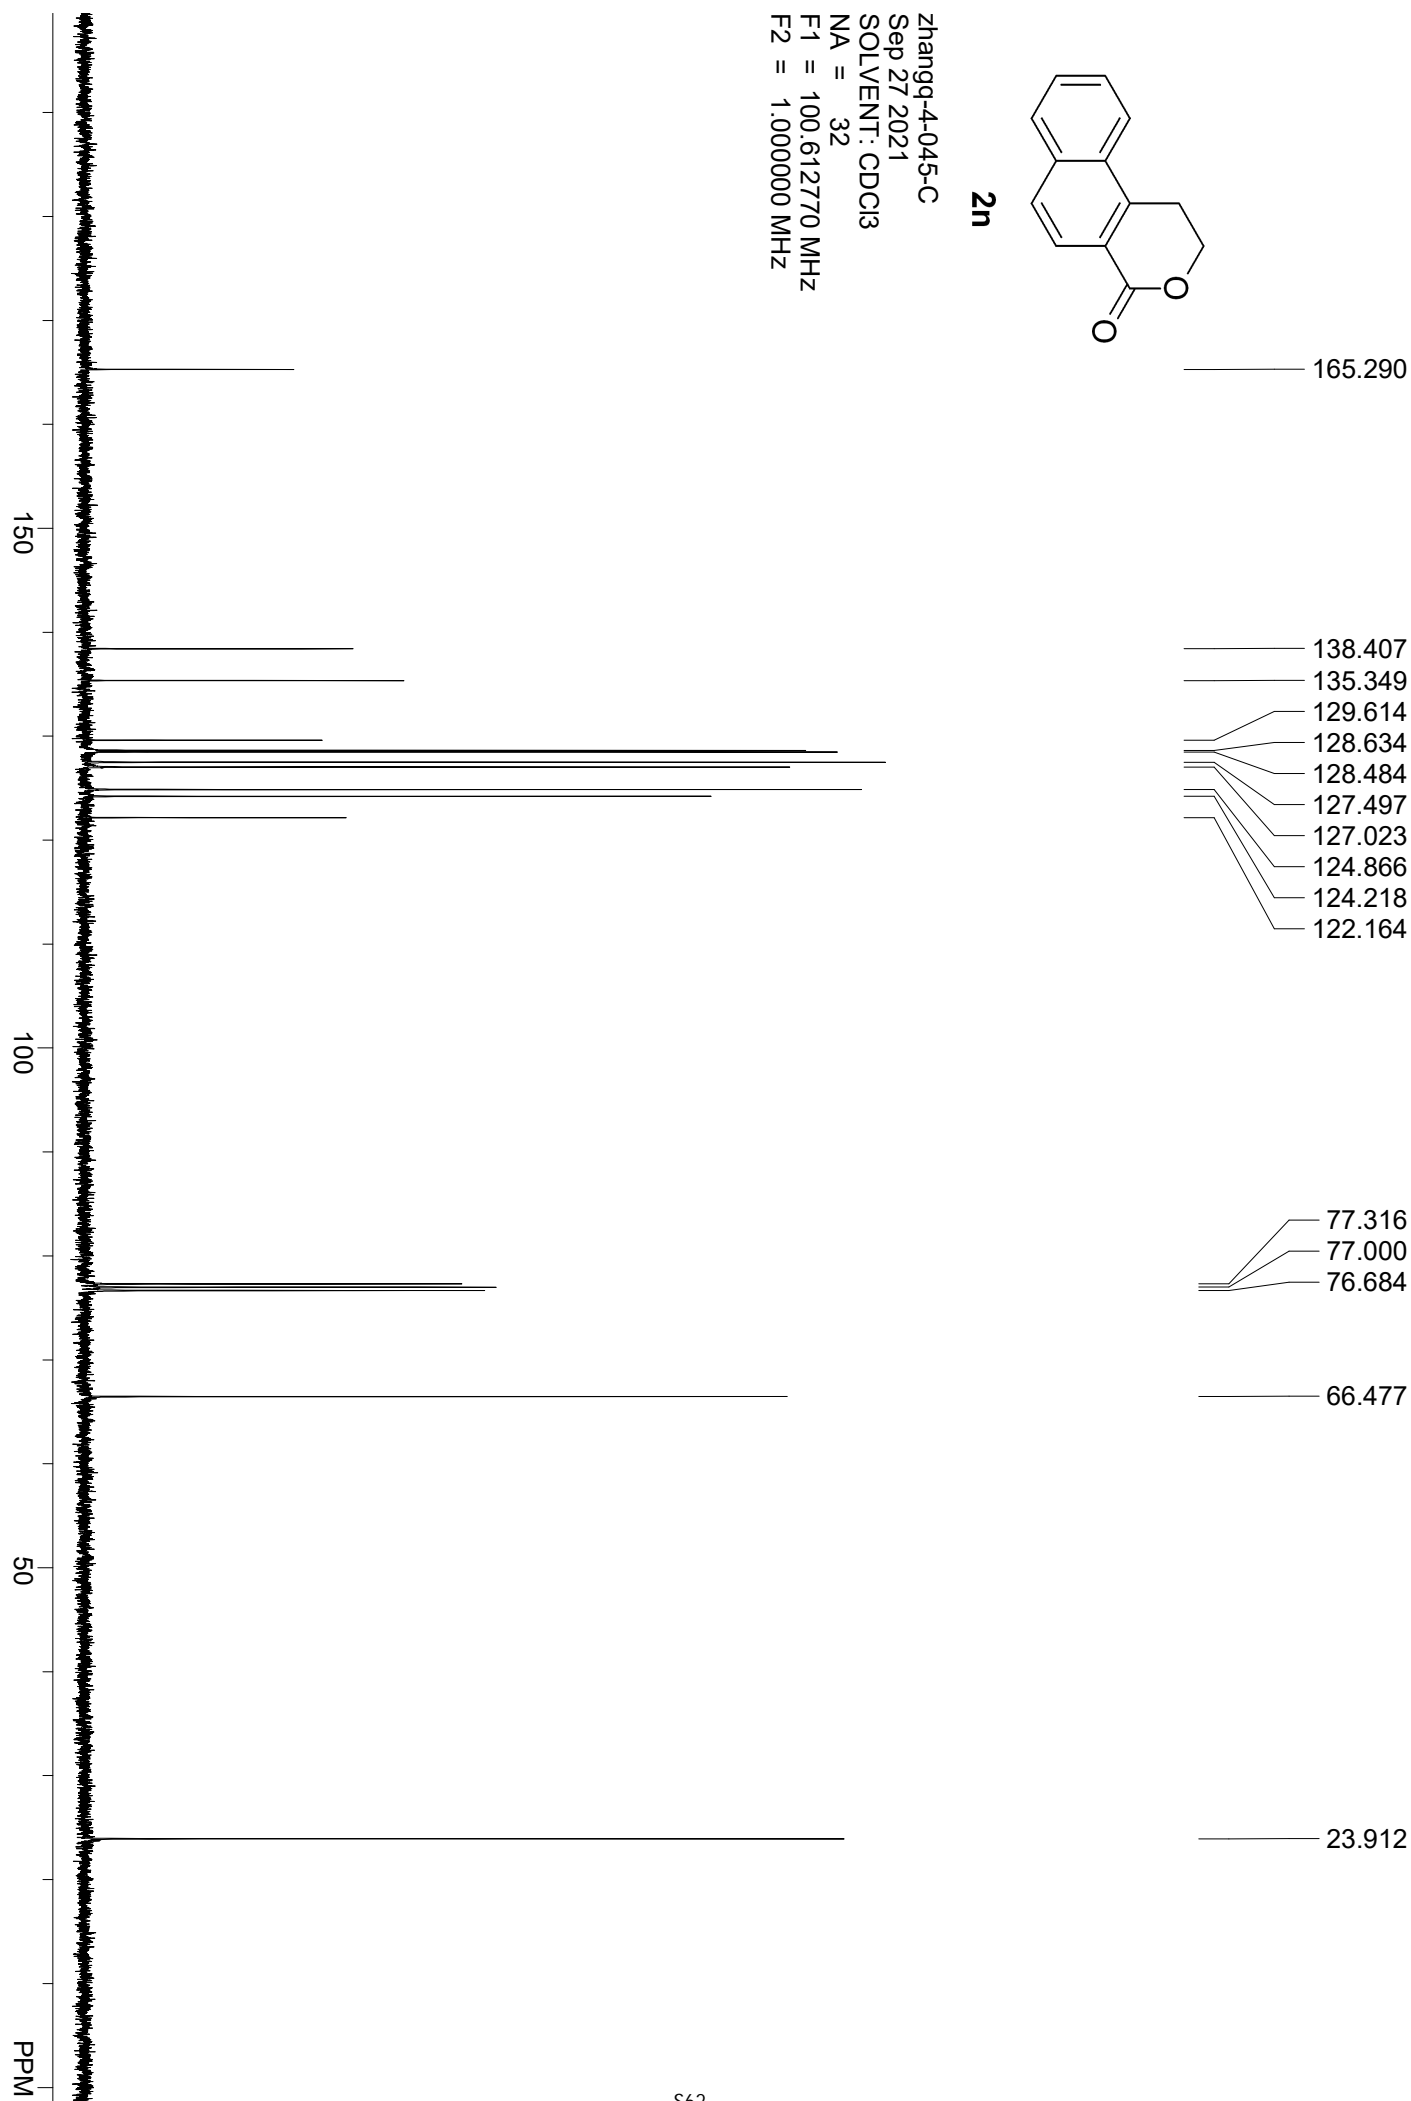

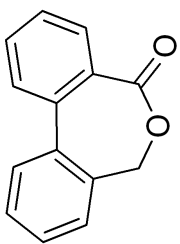

2o

Zhangq-5-030-H  
Mar 17 2022  
SOLVENT: CDCl3  
NA = 4  
F1 = 400.130005 MHz  
F2 = 1.000000 MHz

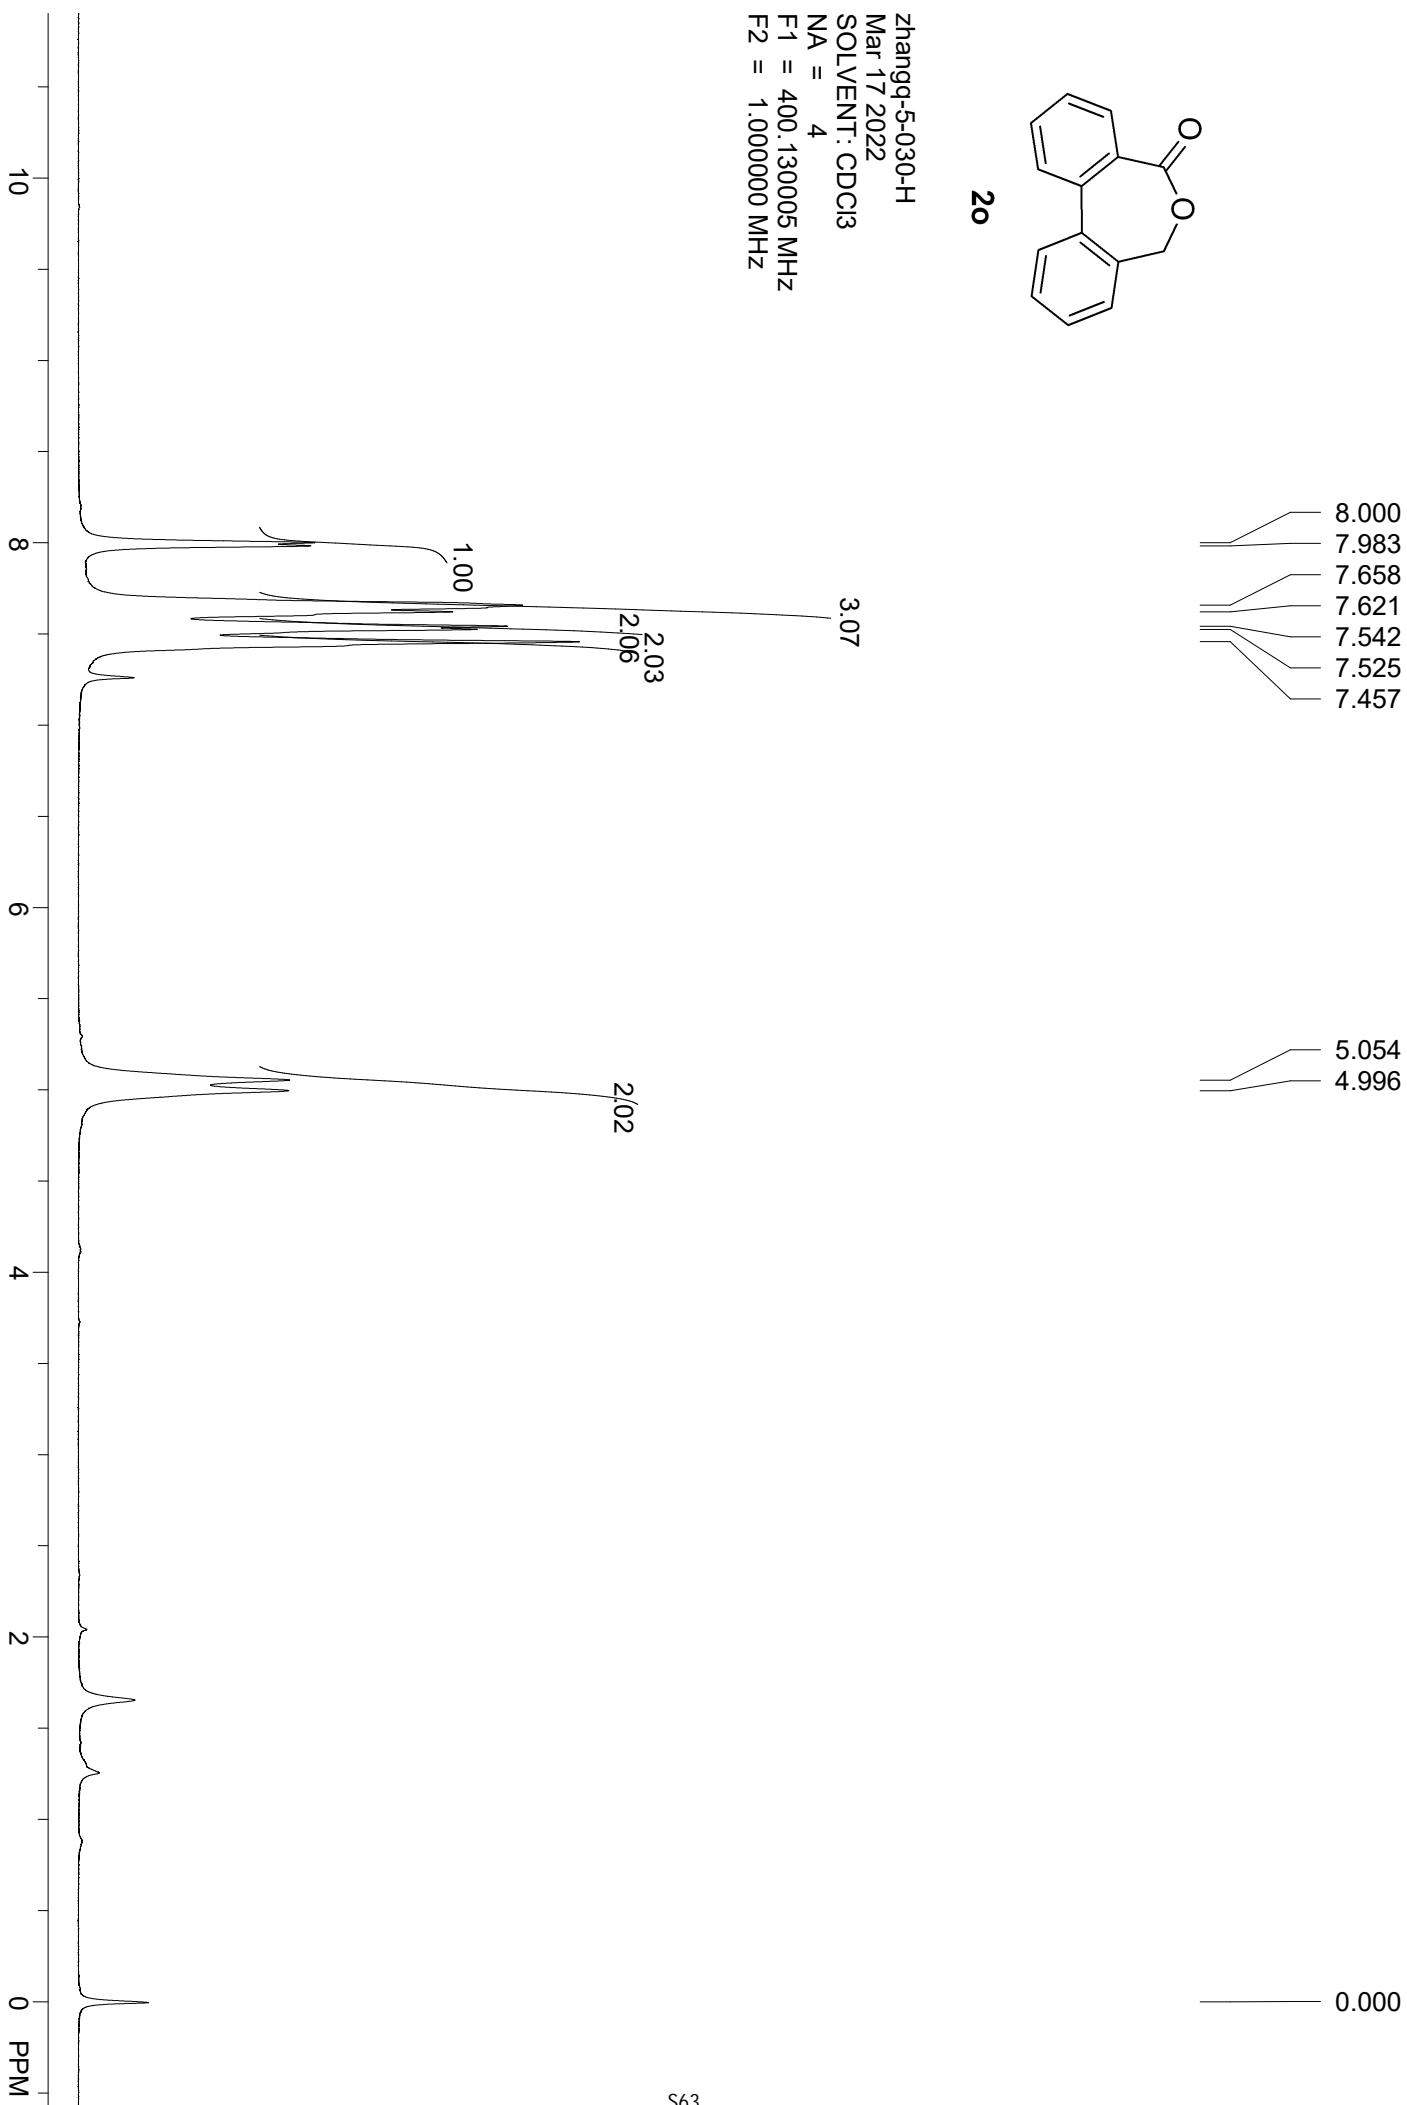

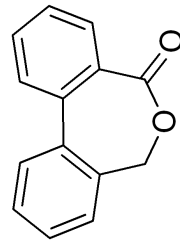

**20**

Zhangq-5-030-C  
Mar 16 2022  
SOLVENT: CDCl<sub>3</sub>  
NA = 27  
F1 = 100.612770 MHz  
F2 = 1.000000 MHz

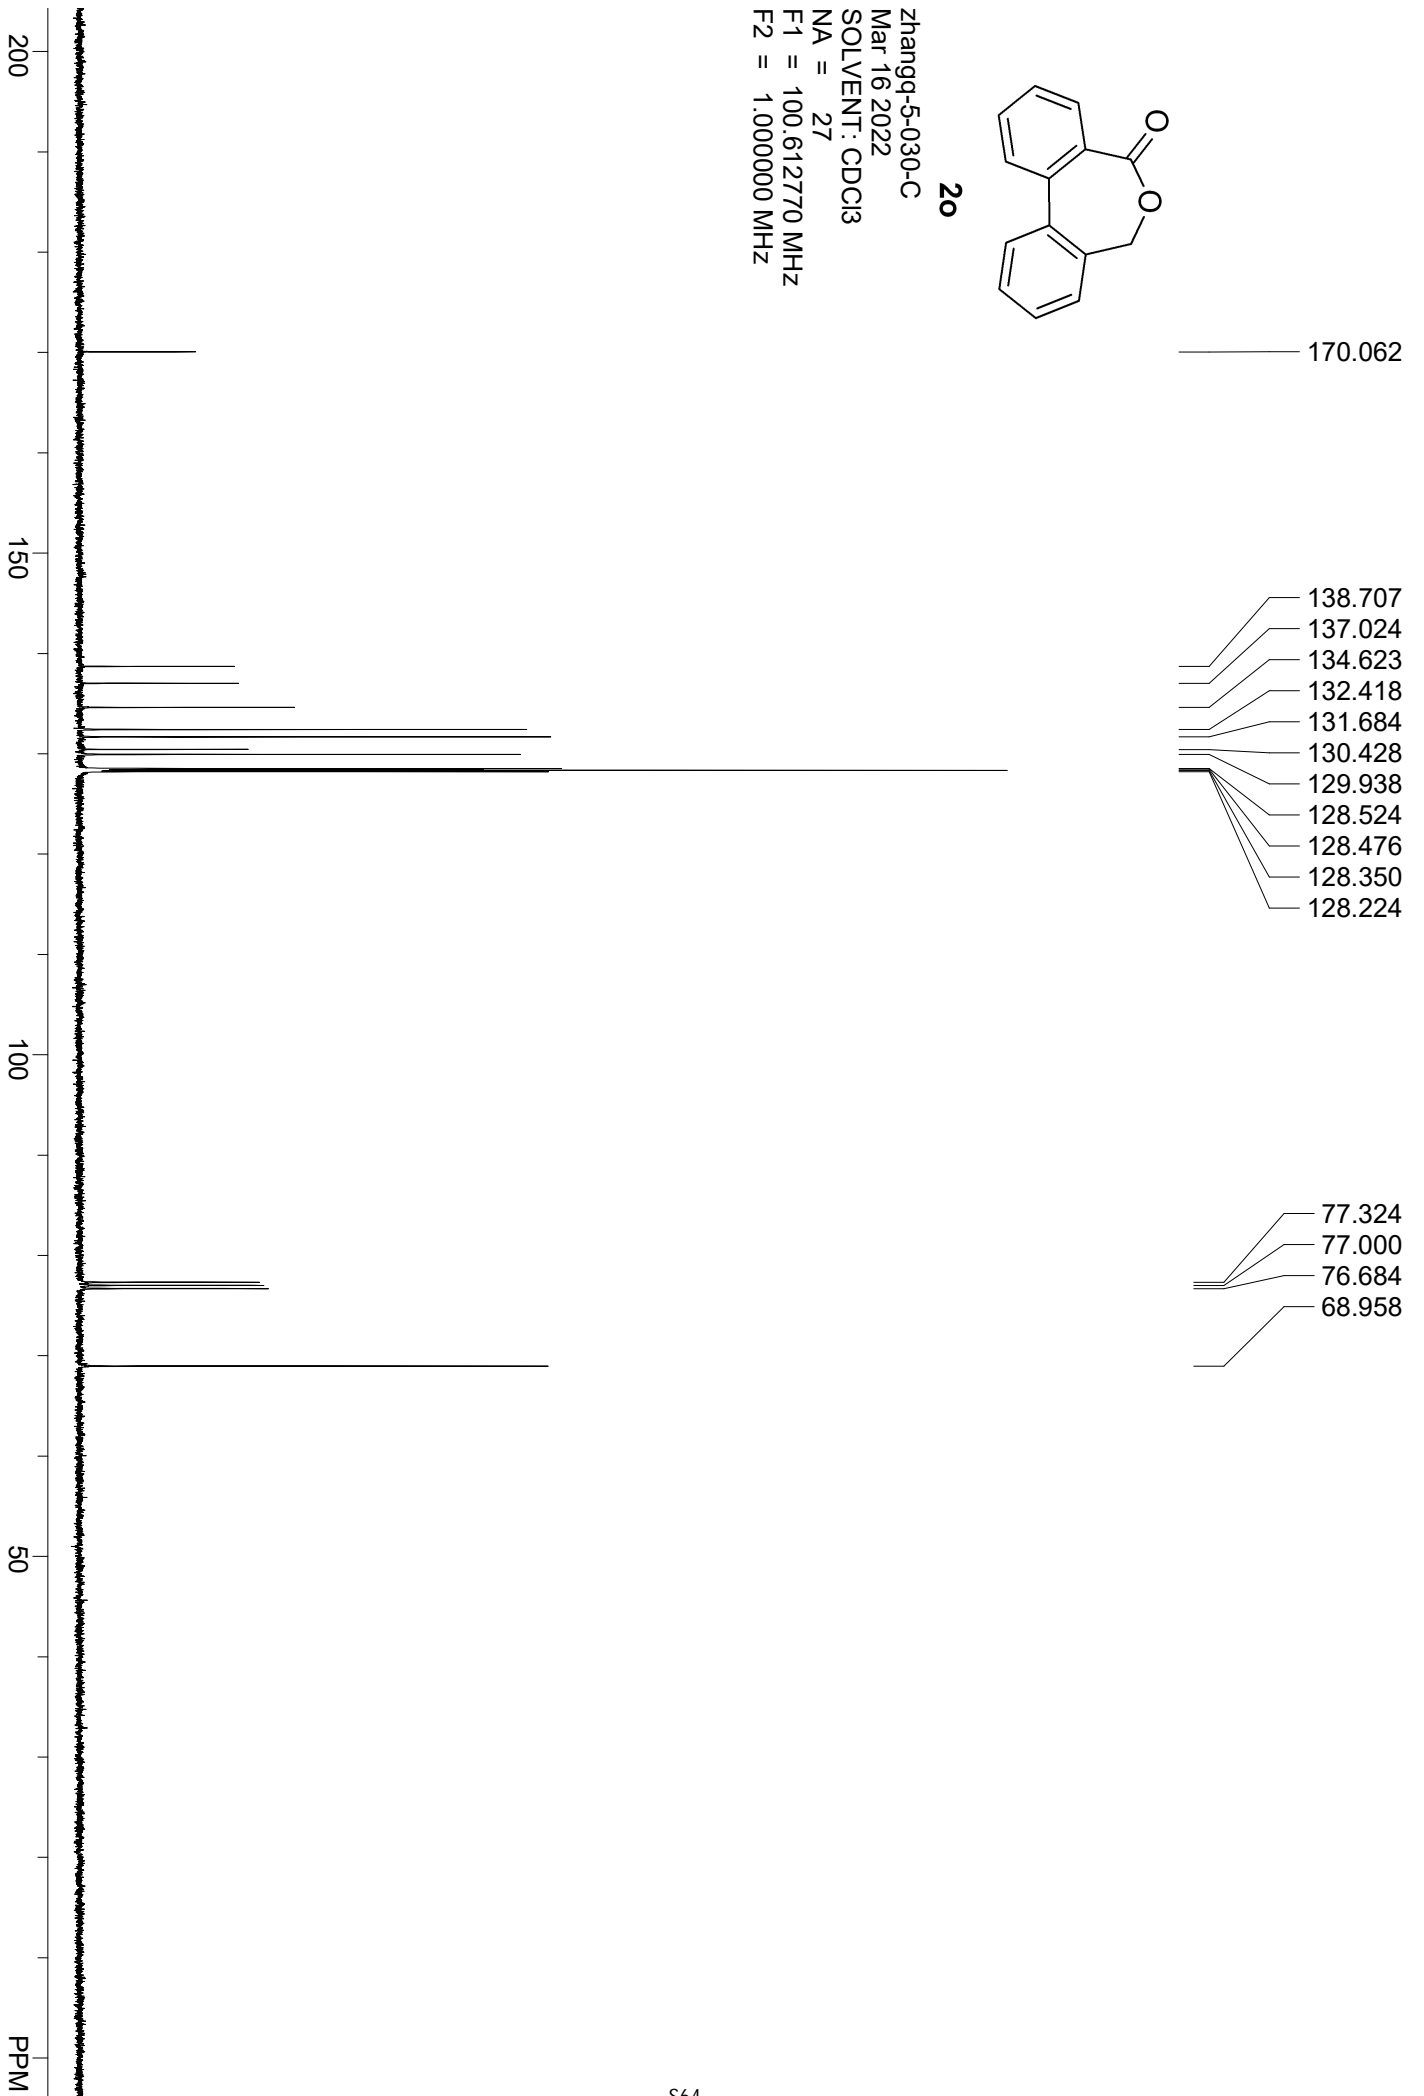



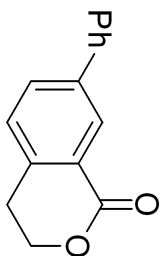

**2p**

Zhangq-5-029-H  
Mar 16 2022  
SOLVENT: CDCl3  
NA = 4  
F1 = 400.130005 MHz  
F2 = 1.000000 MHz

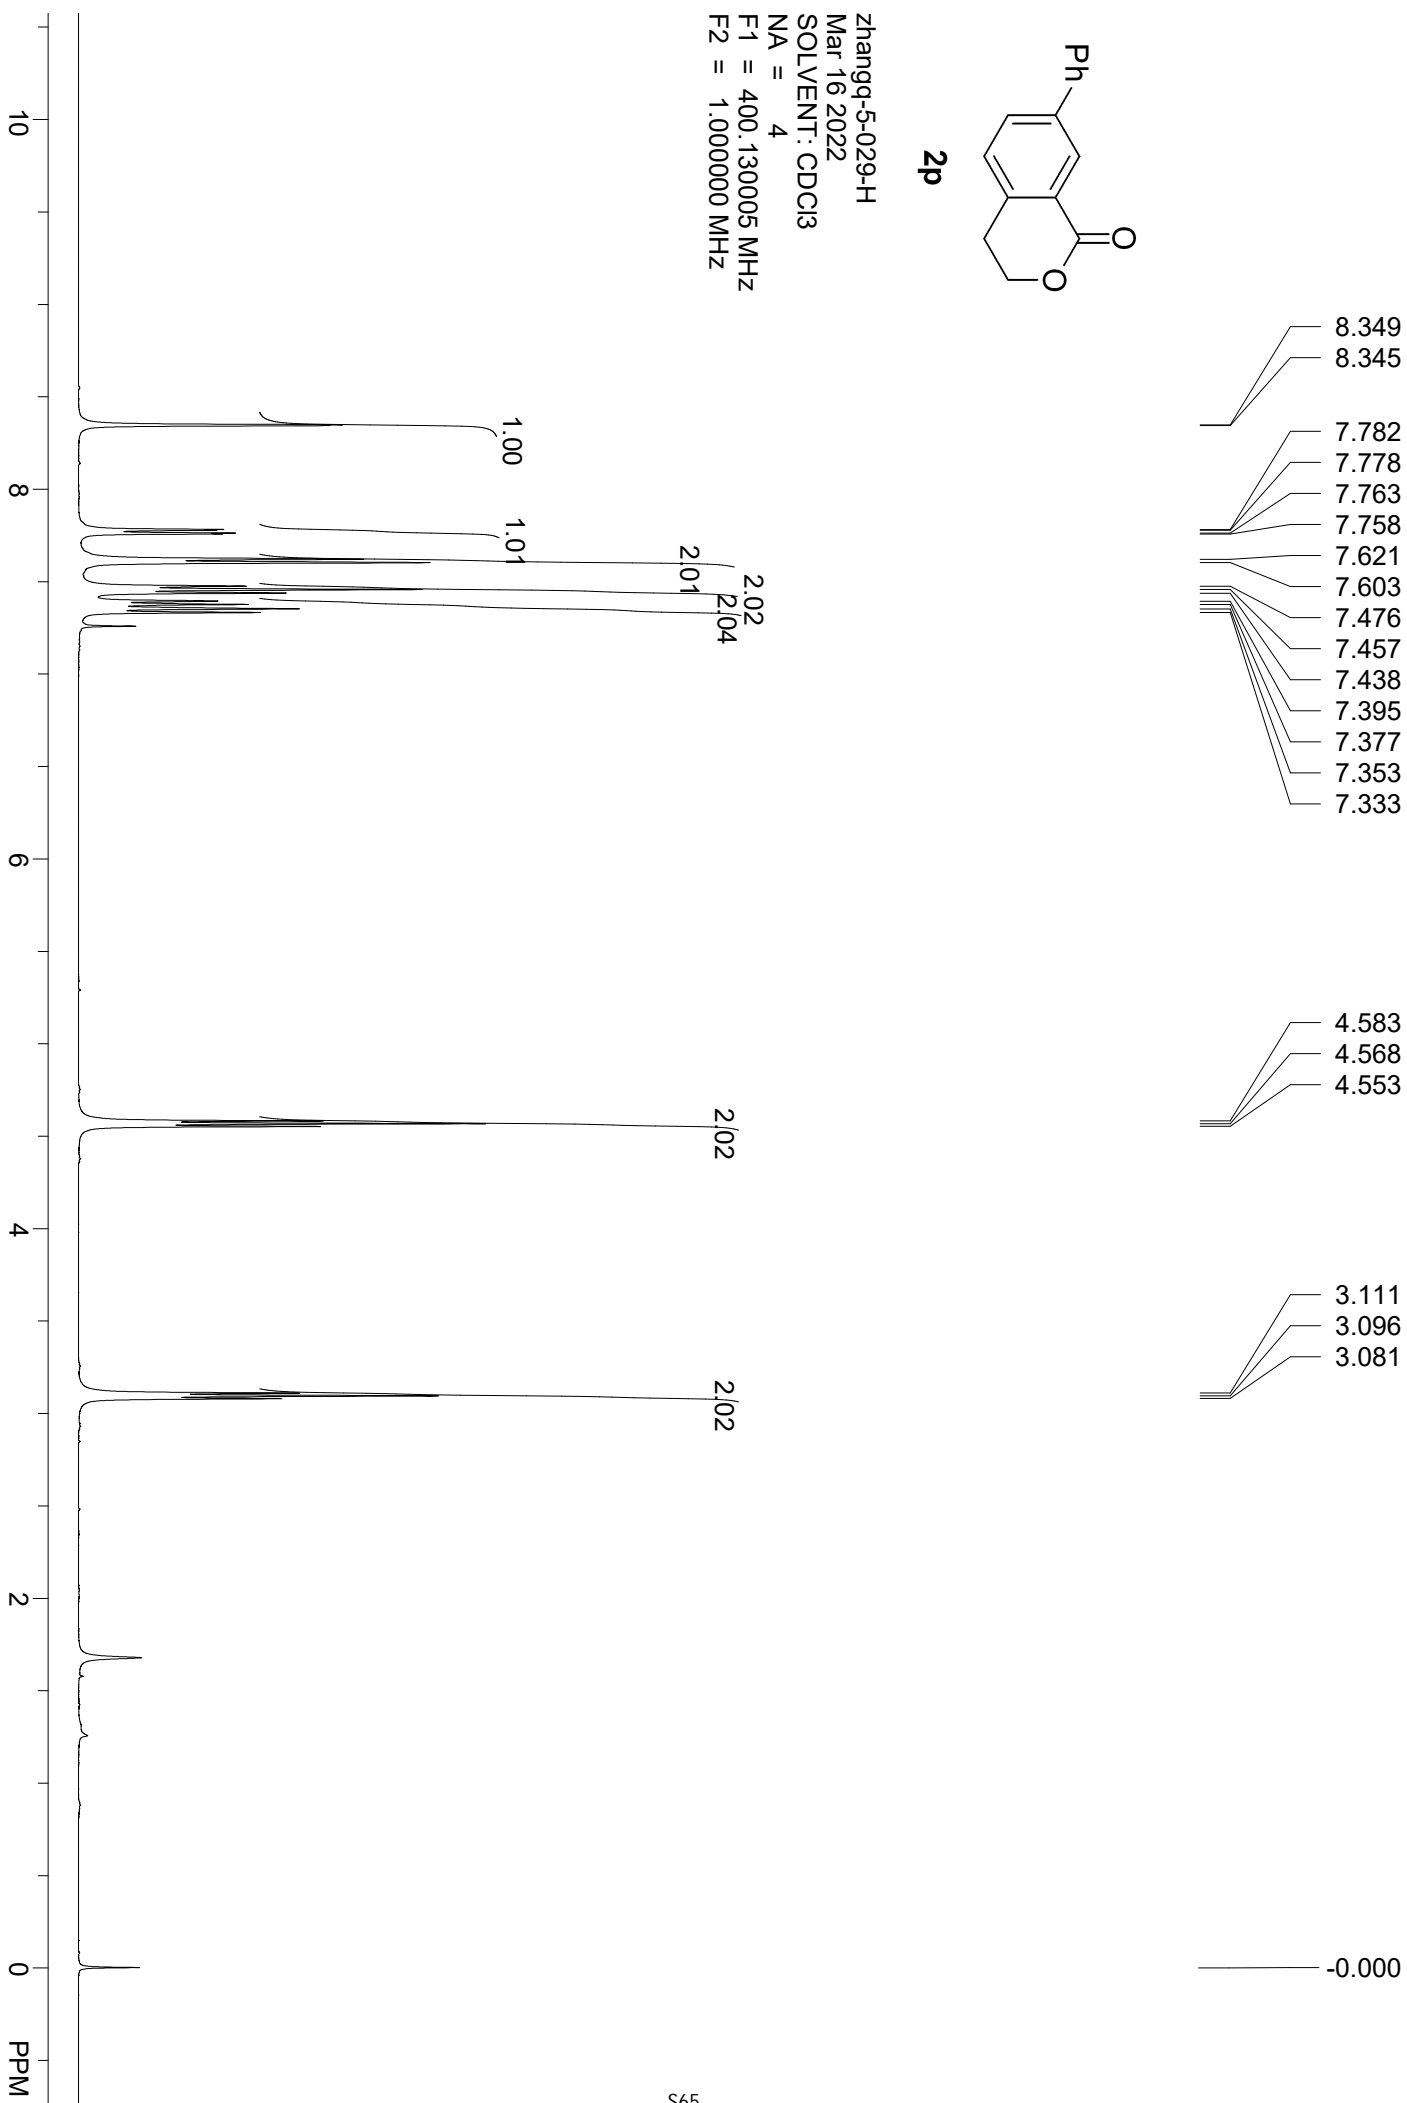

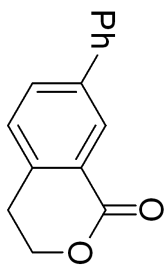

**2p**

Zhangq-5-029-C  
Mar 16 2022  
SOLVENT: CDCl3  
NA = 64  
F1 = 100.612770 MHz  
F2 = 1.000000 MHz

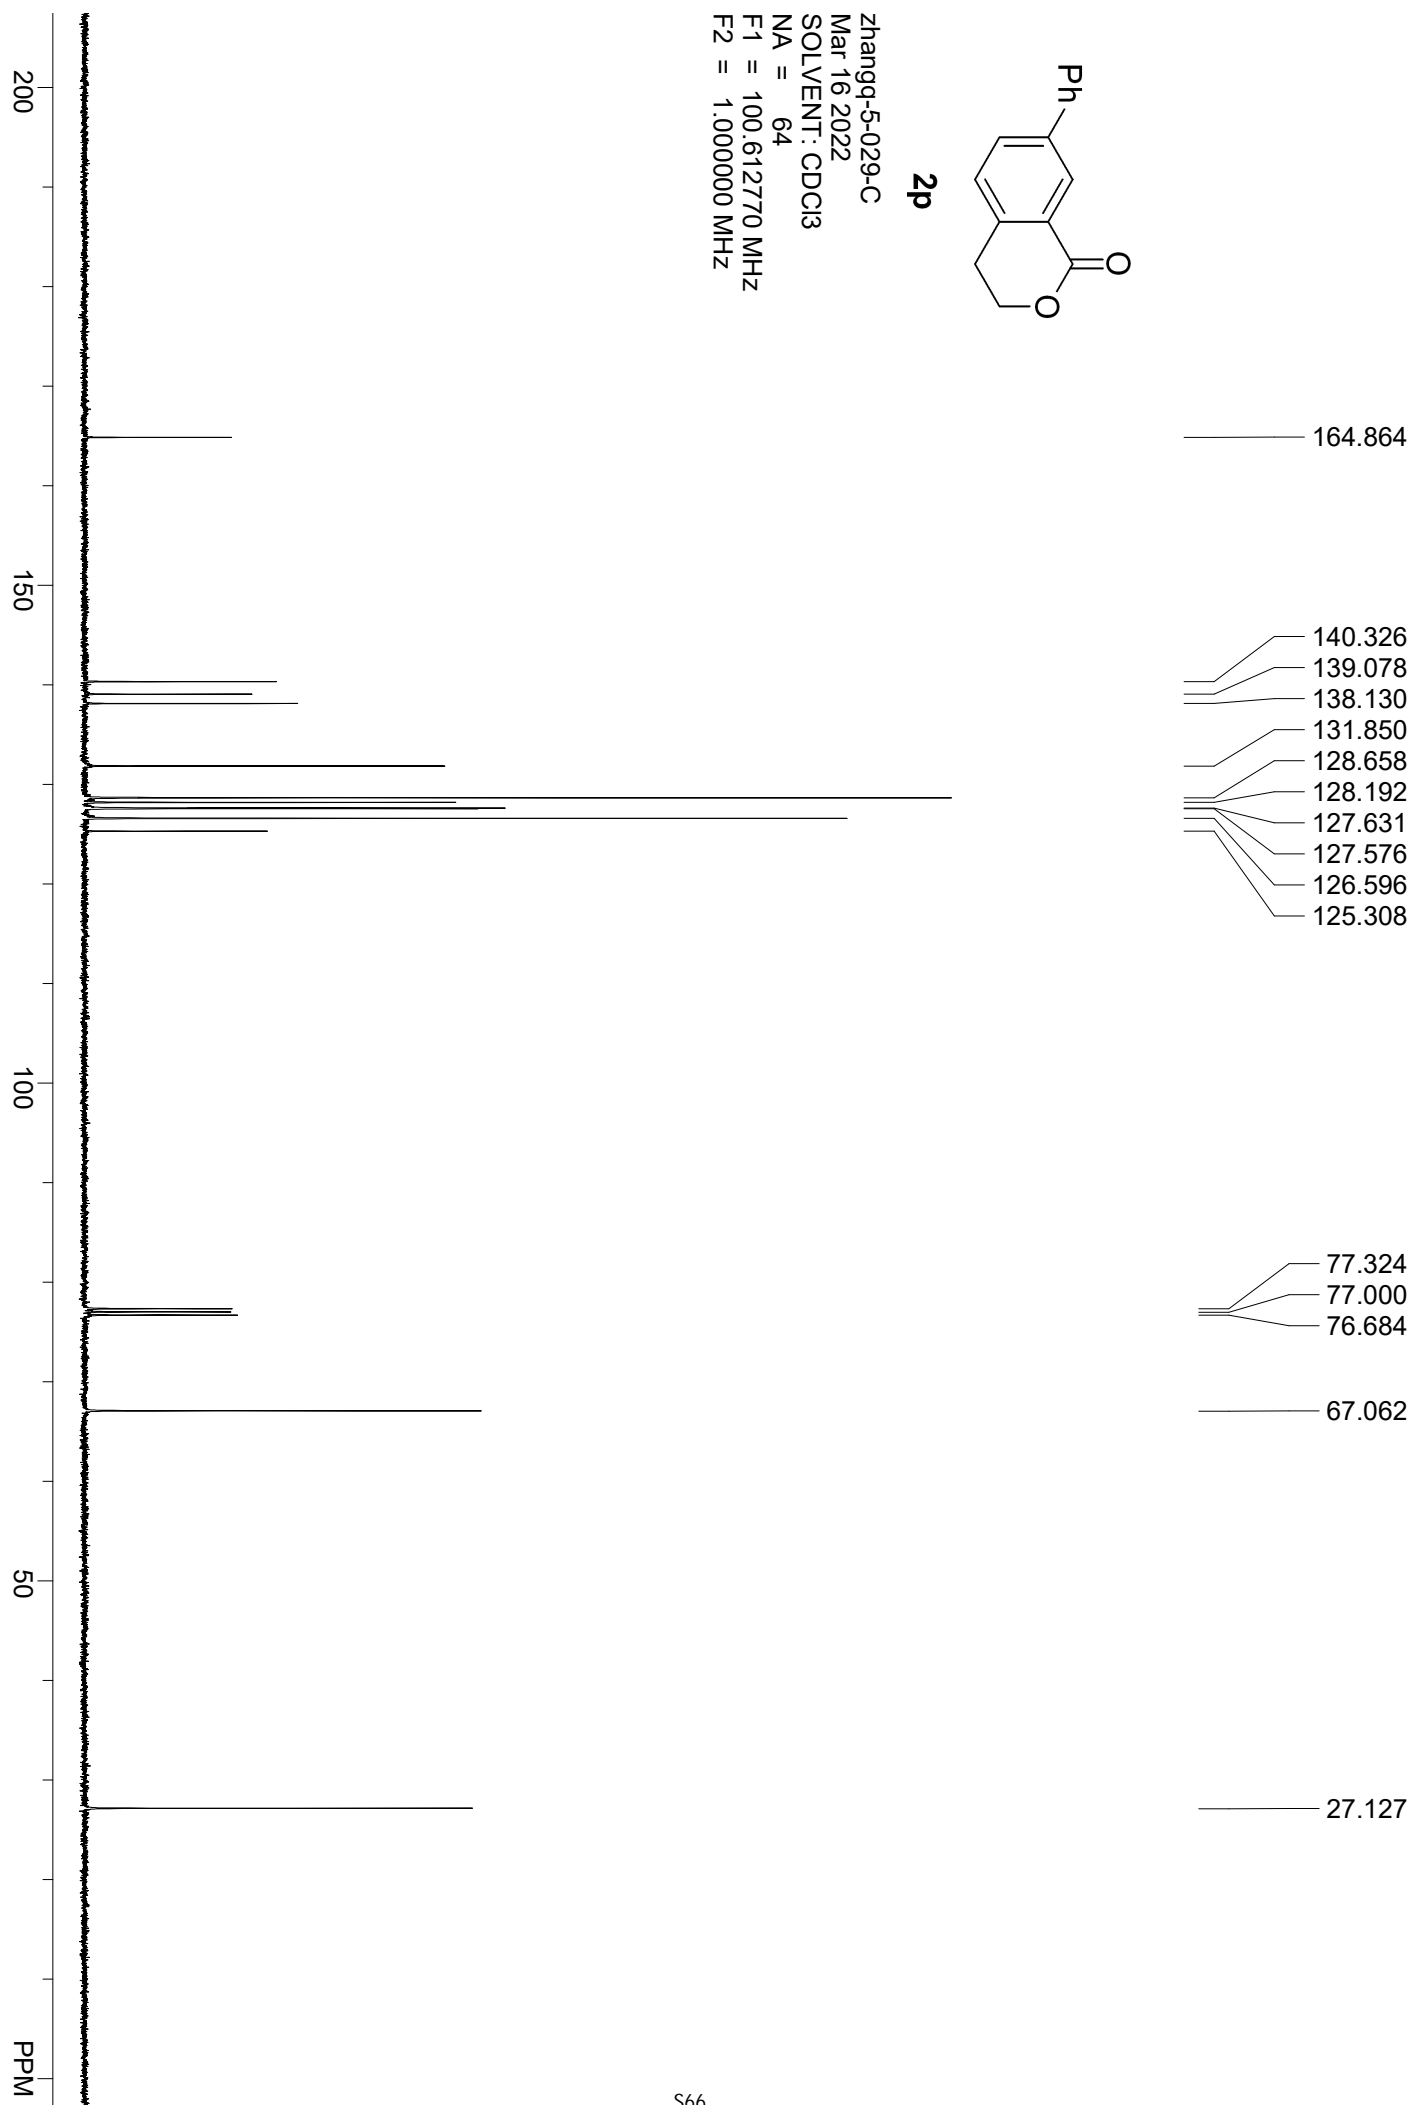

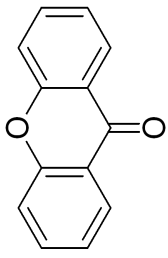

5

Zhangq-5-038-H  
Mar 26 2022  
SOLVENT: CDCl3  
NA = 4  
F1 = 400.130005 MHz  
F2 = 1.000000 MHz

8.329  
8.310  
7.713  
7.710  
7.692  
7.674  
7.462  
7.441  
7.370  
7.351  
7.333

0.000

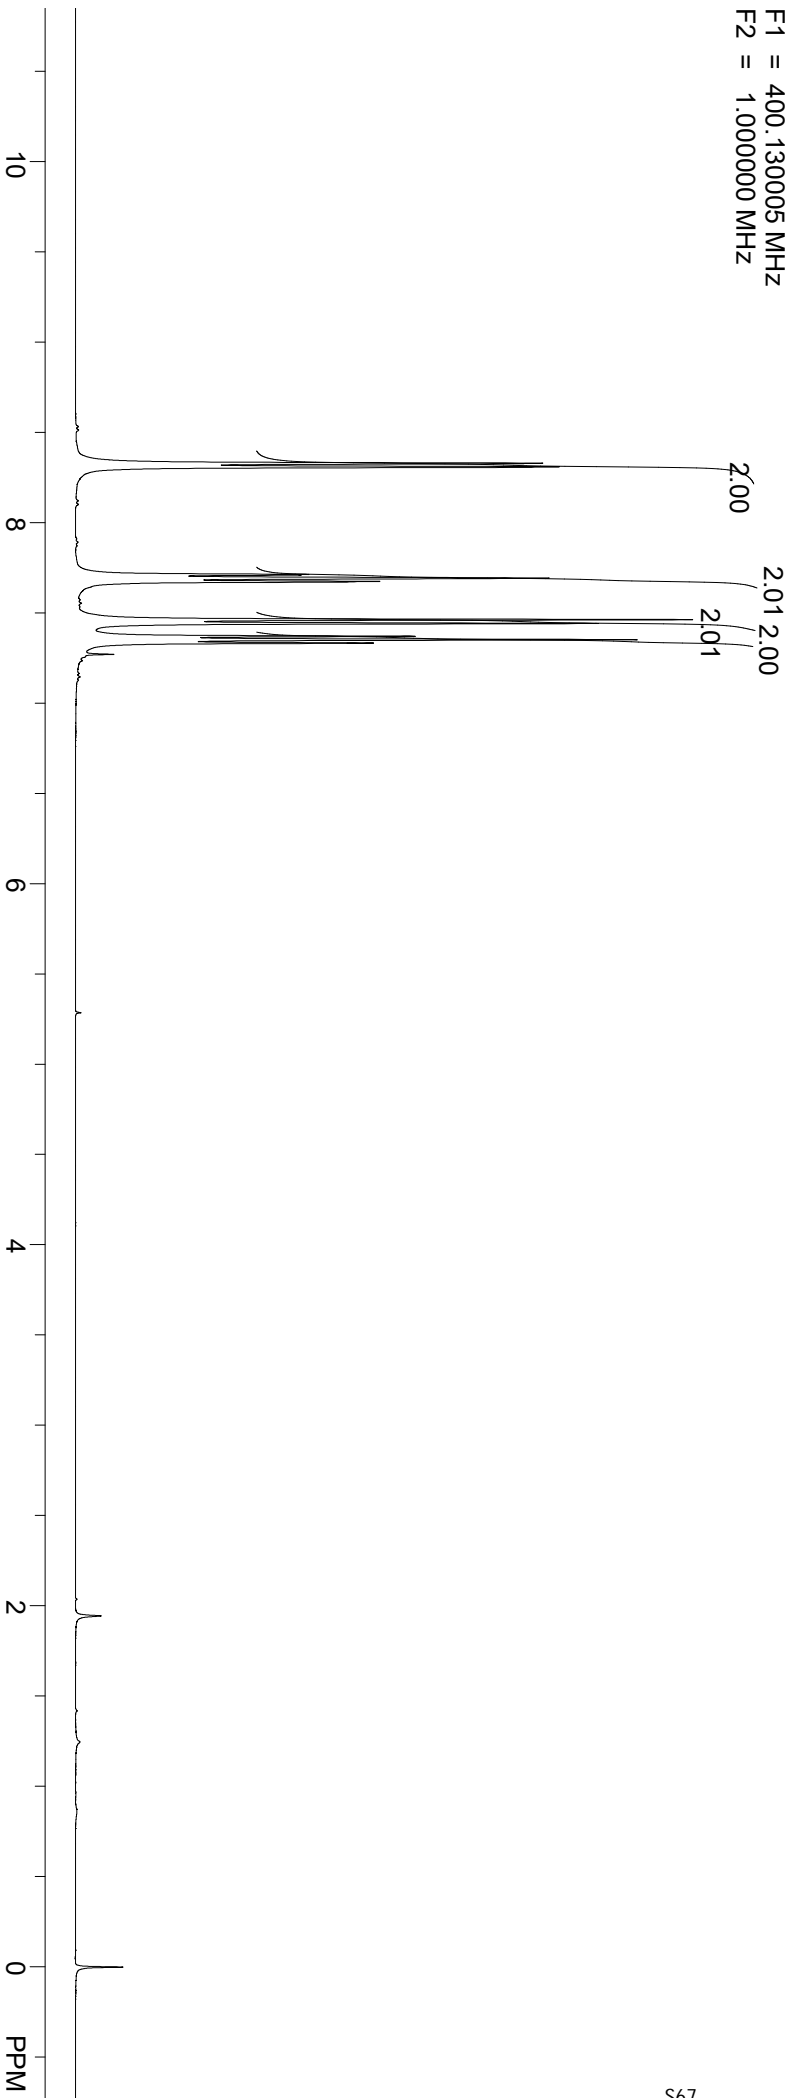

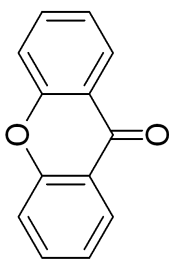

5

Zhangq-5-038-C  
Mar 26 2022  
SOLVENT: CDCl3  
NA = 150  
F1 = 100.612770 MHz  
F2 = 1.000000 MHz

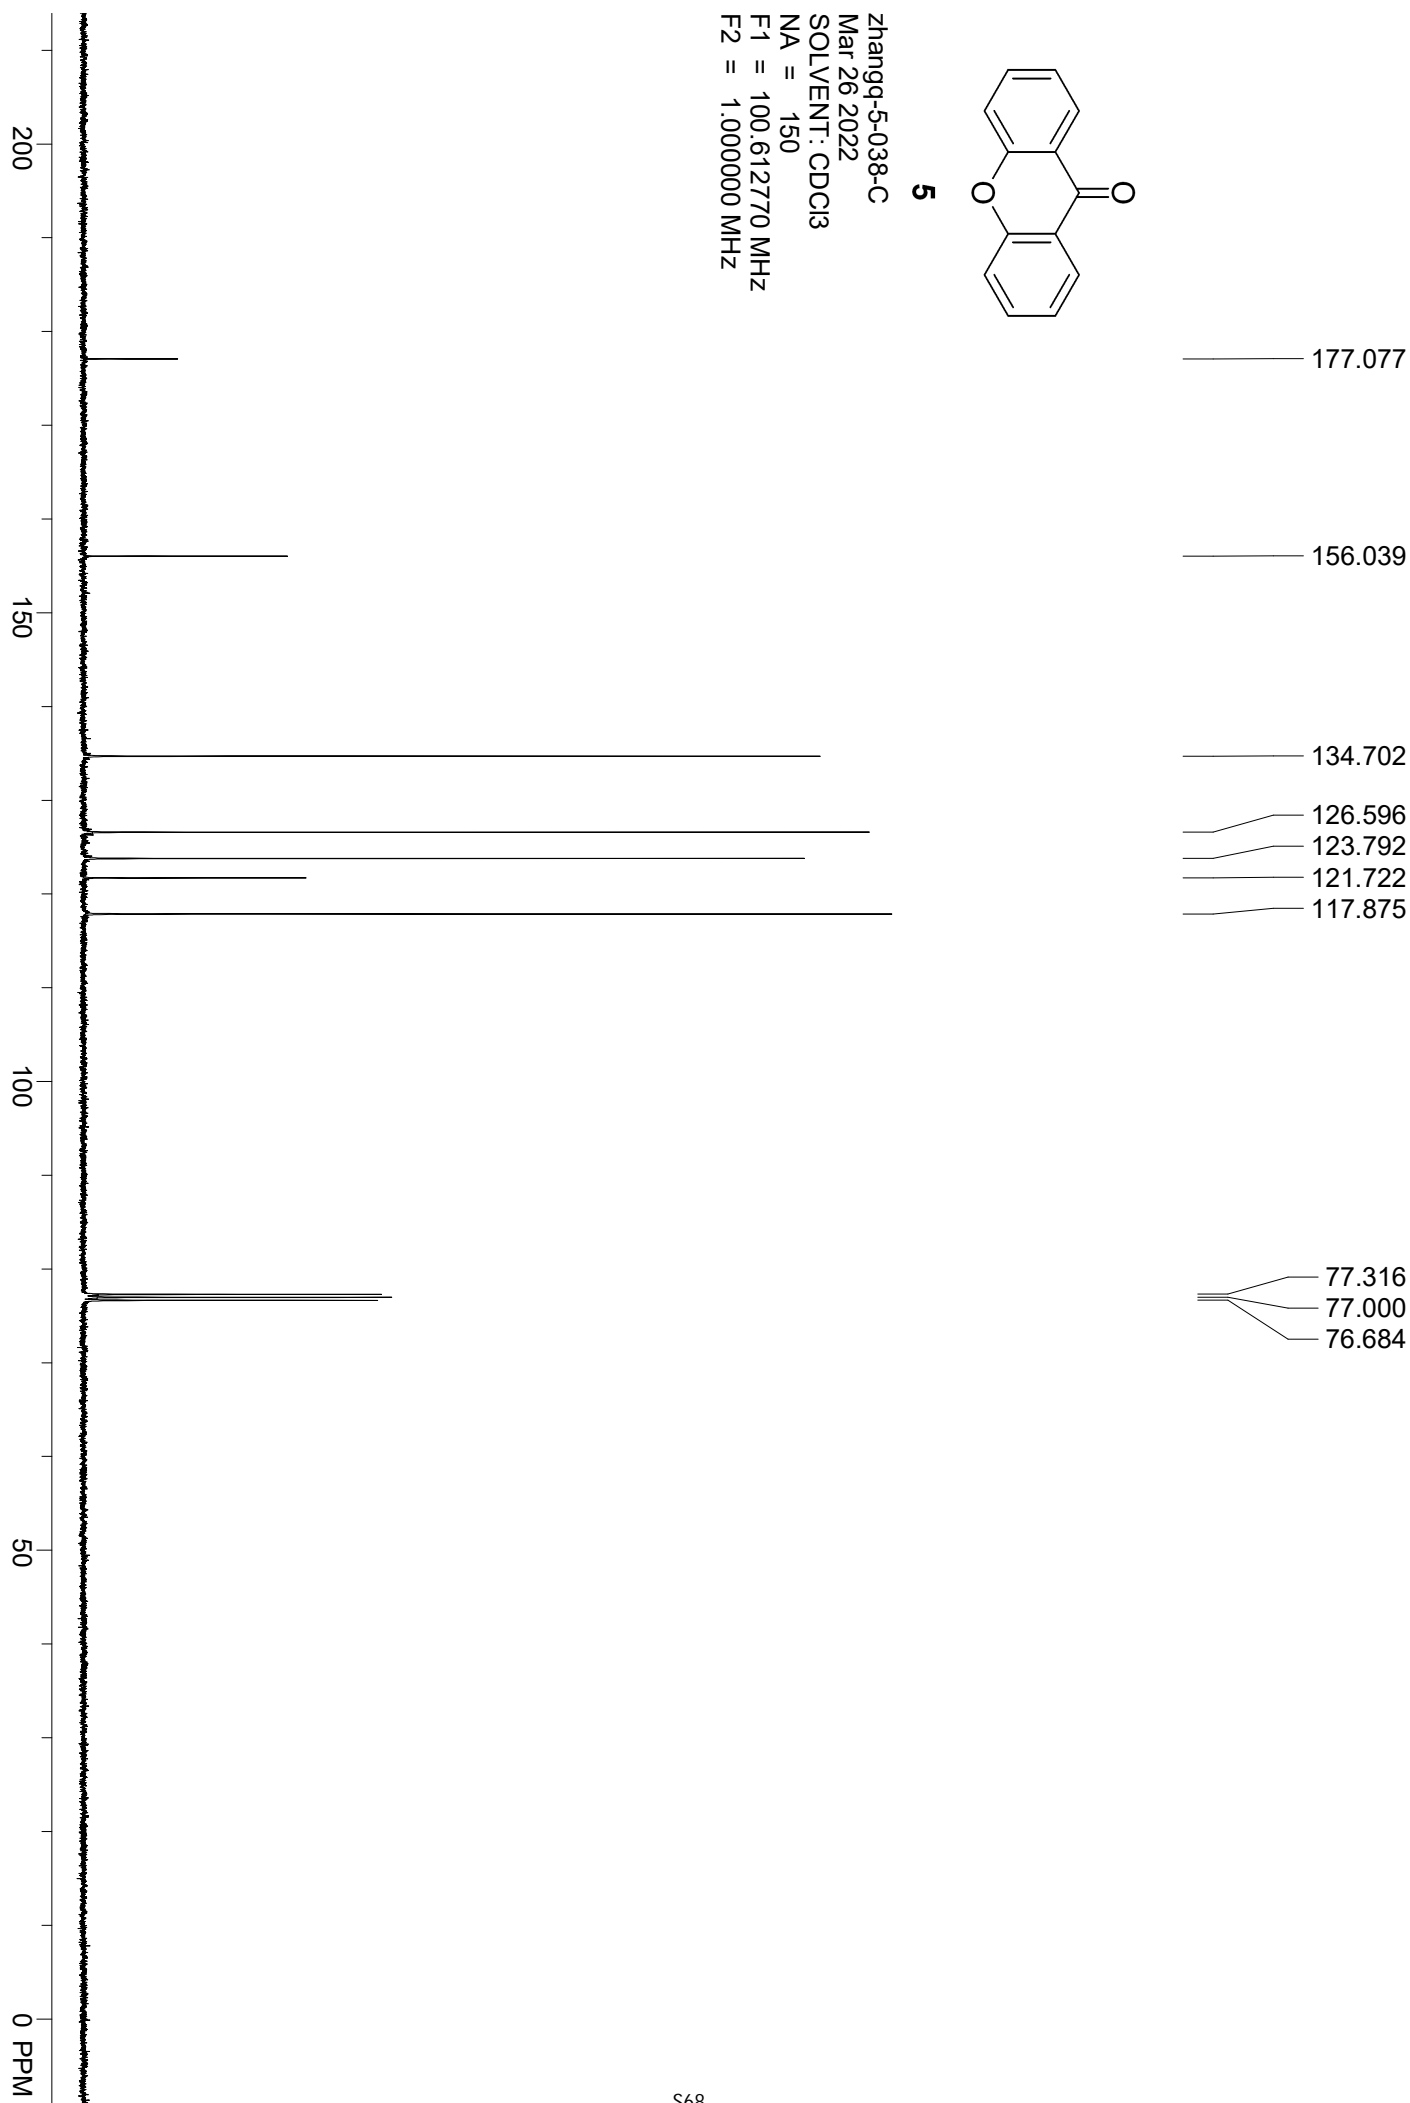

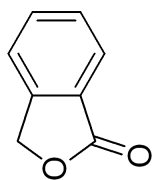

**2q**

zhangq-3-150-H  
Jun 12 2021  
SOLVENT: CDCl3  
NA = 4  
F1 = 400.130005 MHz  
F2 = 1.000000 MHz

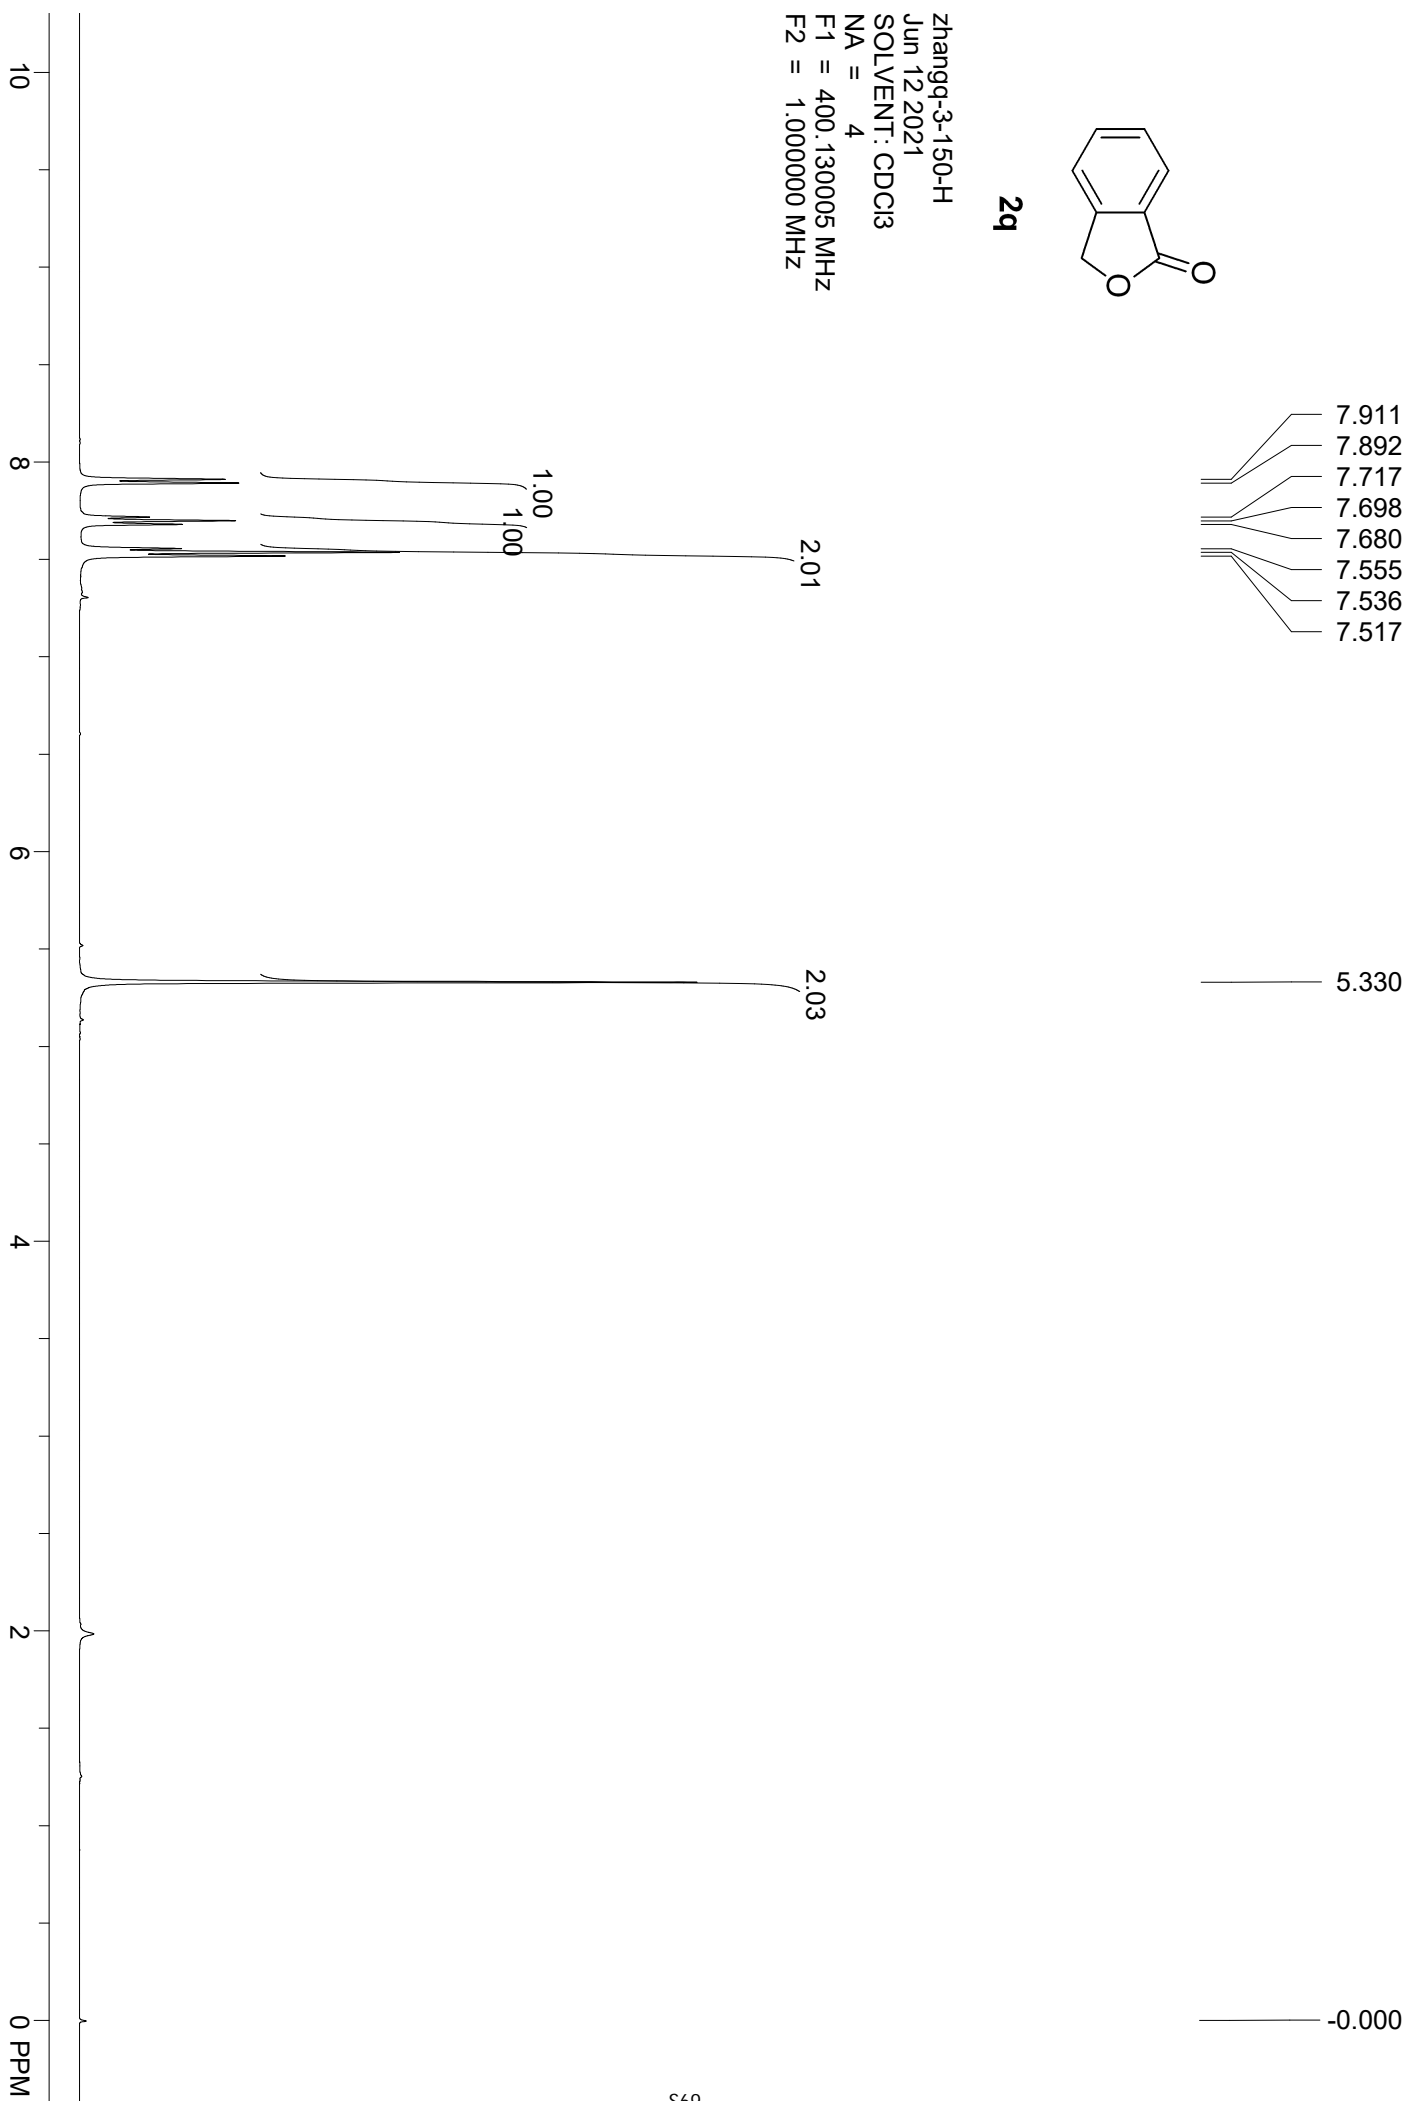

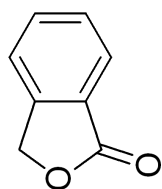

**2q**

zhangq-3-150-C  
Jun 12 021  
SOLVENT: CDCl3  
NA = 32  
F1 = 100.612770 MHz  
F2 = 1.000000 MHz

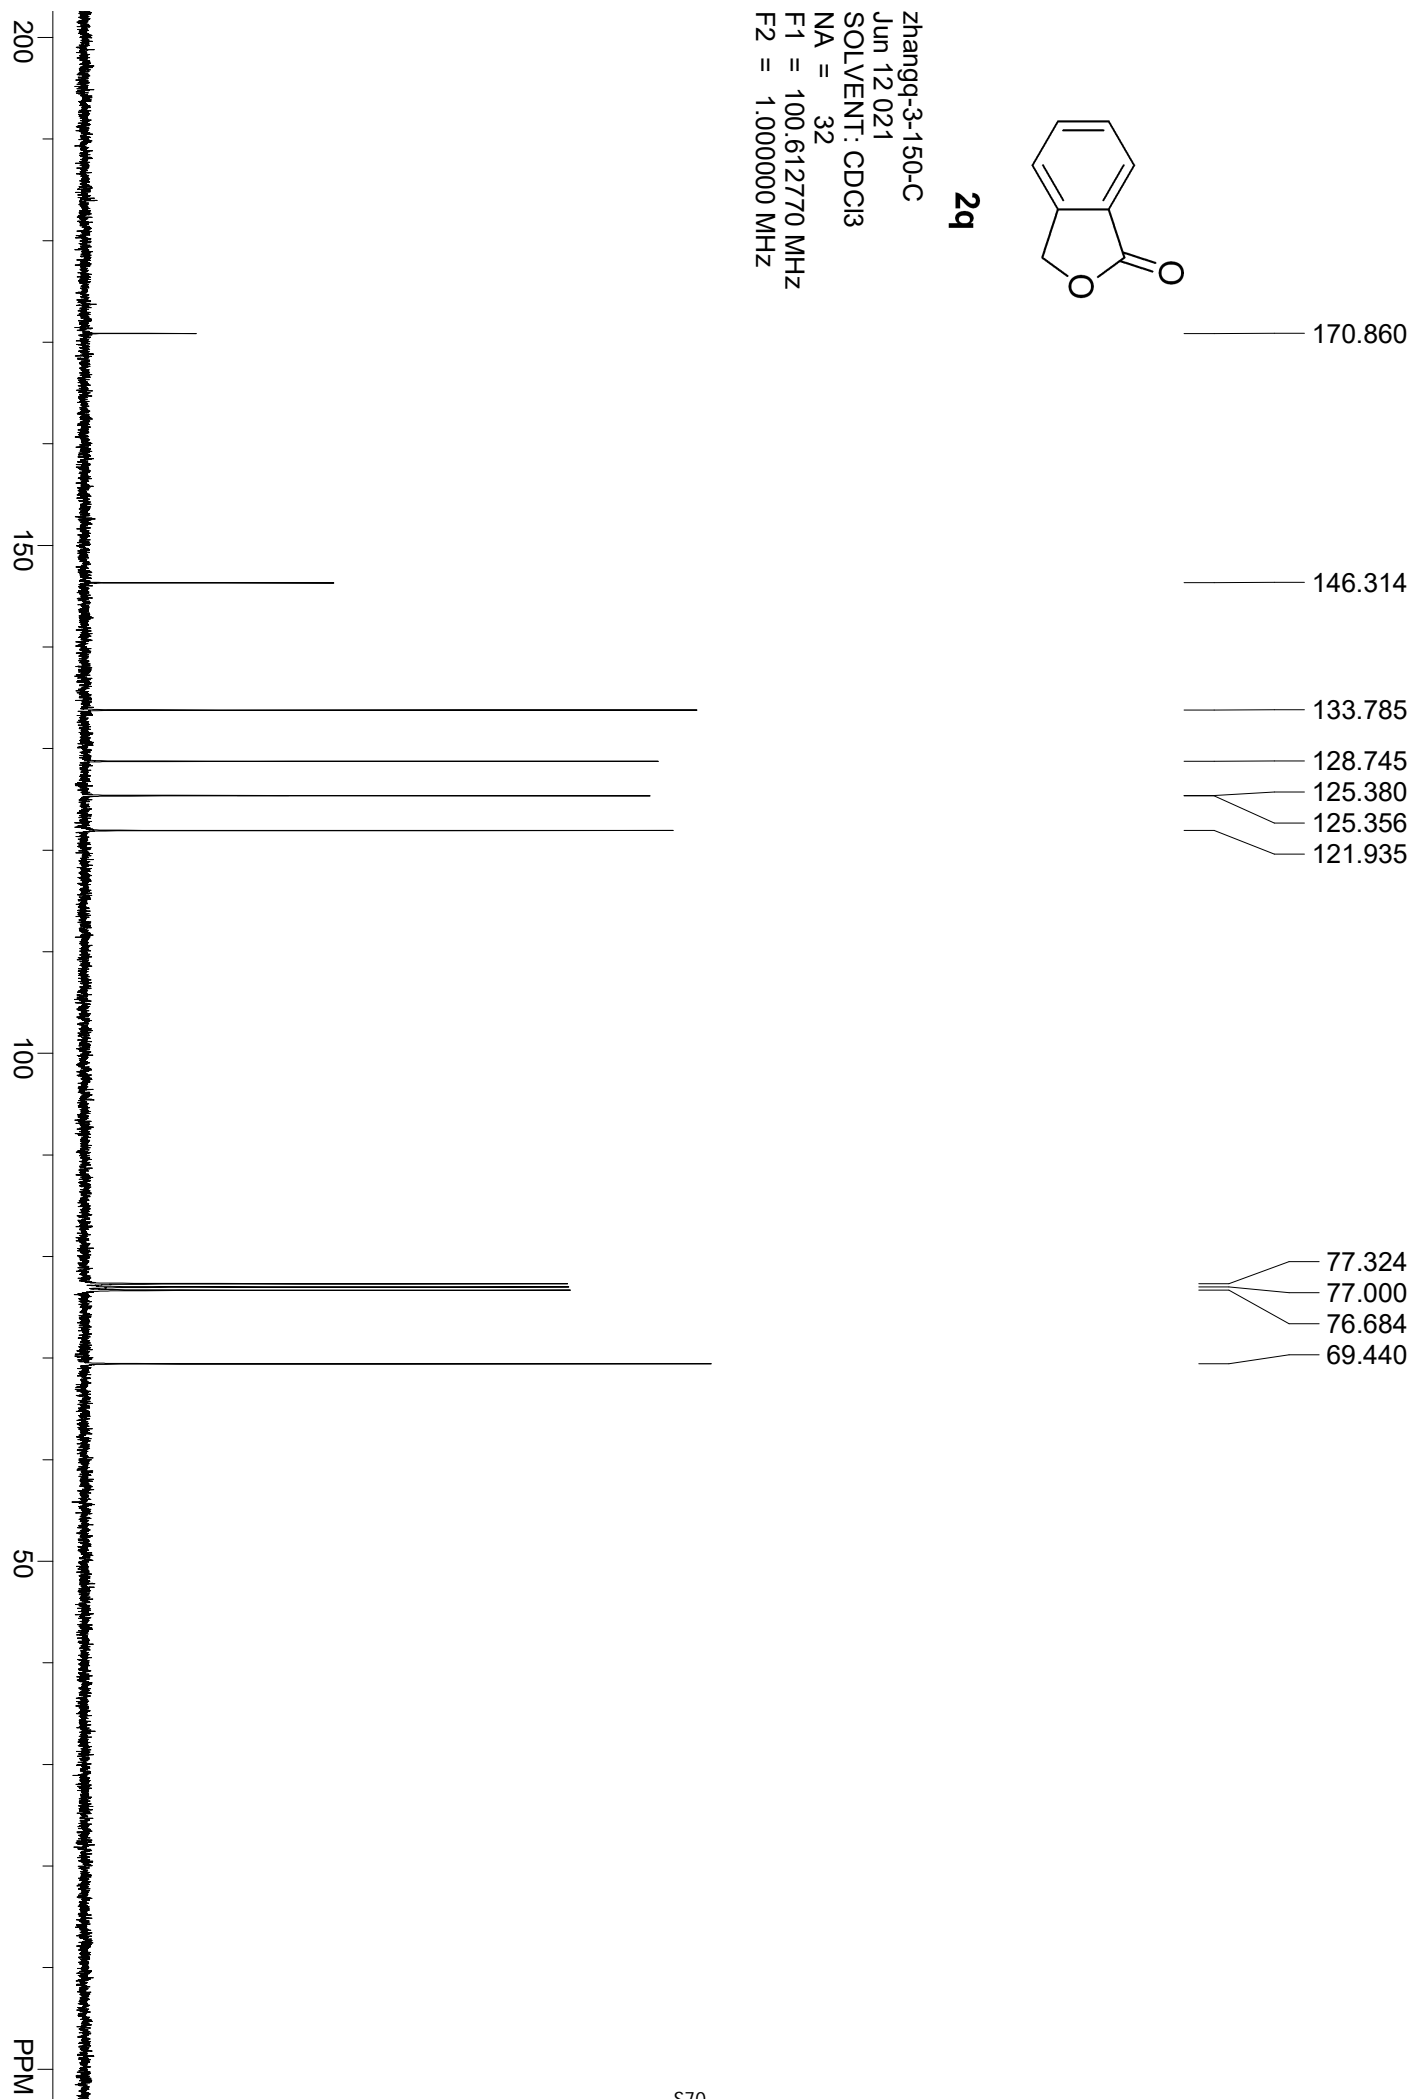

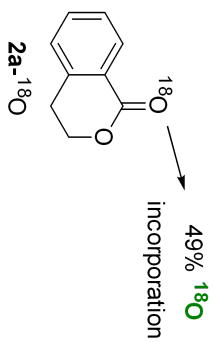

Zhangq-5-034-H  
 Mar 23 2022  
 SOLVENT: CDCl<sub>3</sub>  
 NA = 4  
 F1 = 400.129974 MHz  
 F2 = 1.000000 MHz

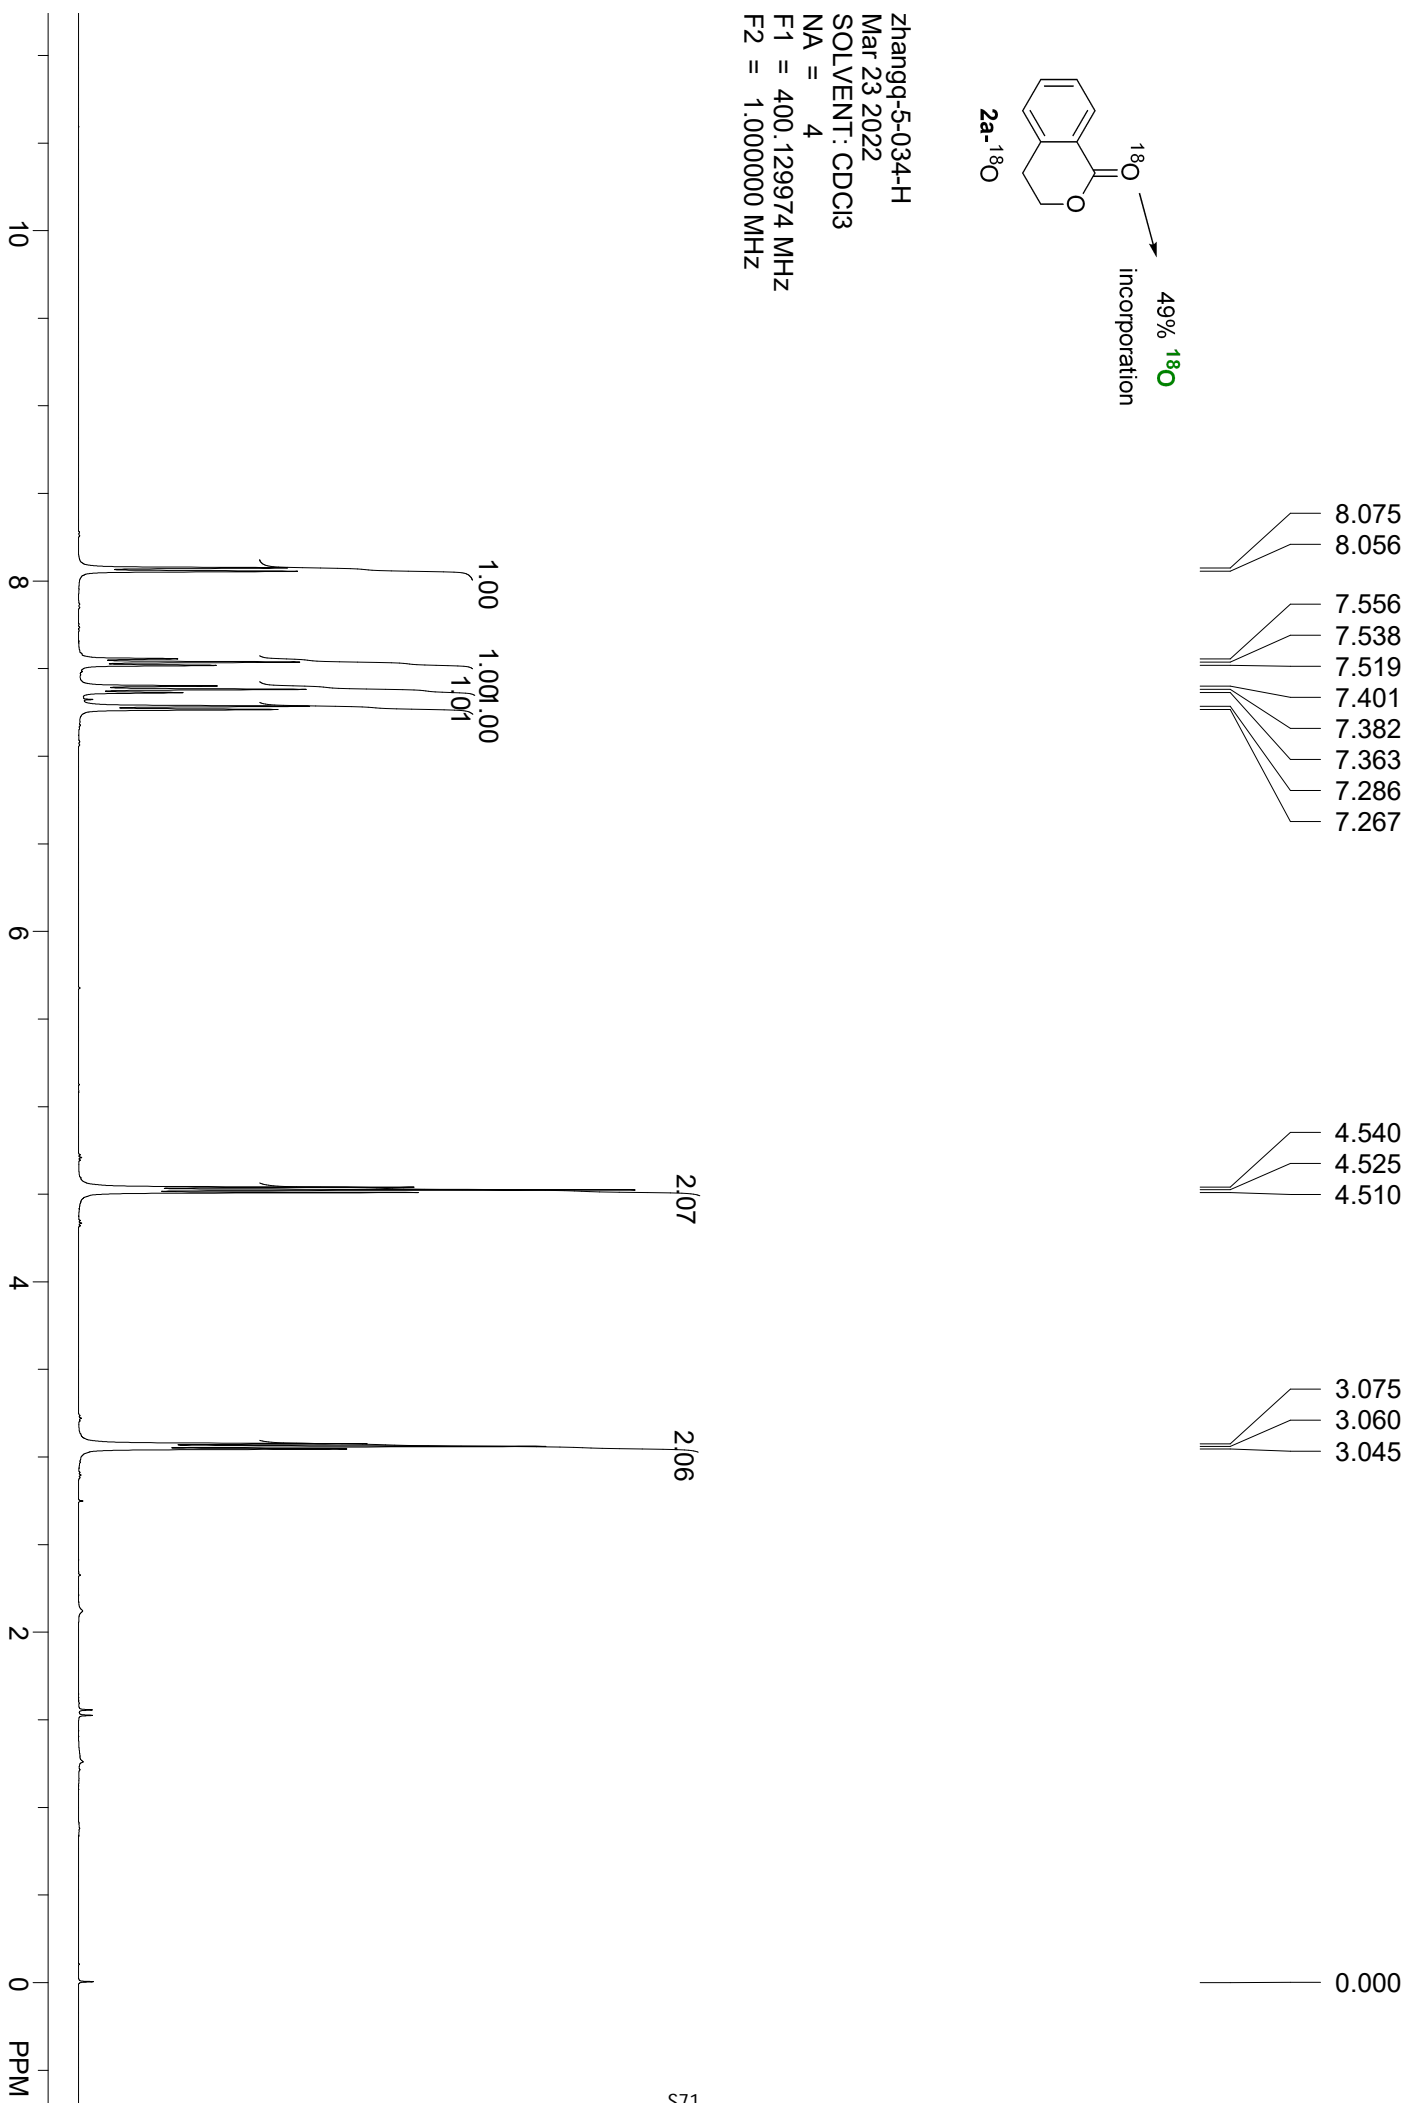

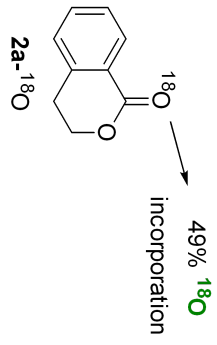

Zhangq-5-034-C  
Mar 23 2022  
SOLVENT: CDCl3  
NA = 64  
F1 = 100.612770 MHz  
F2 = 1.000000 MHz

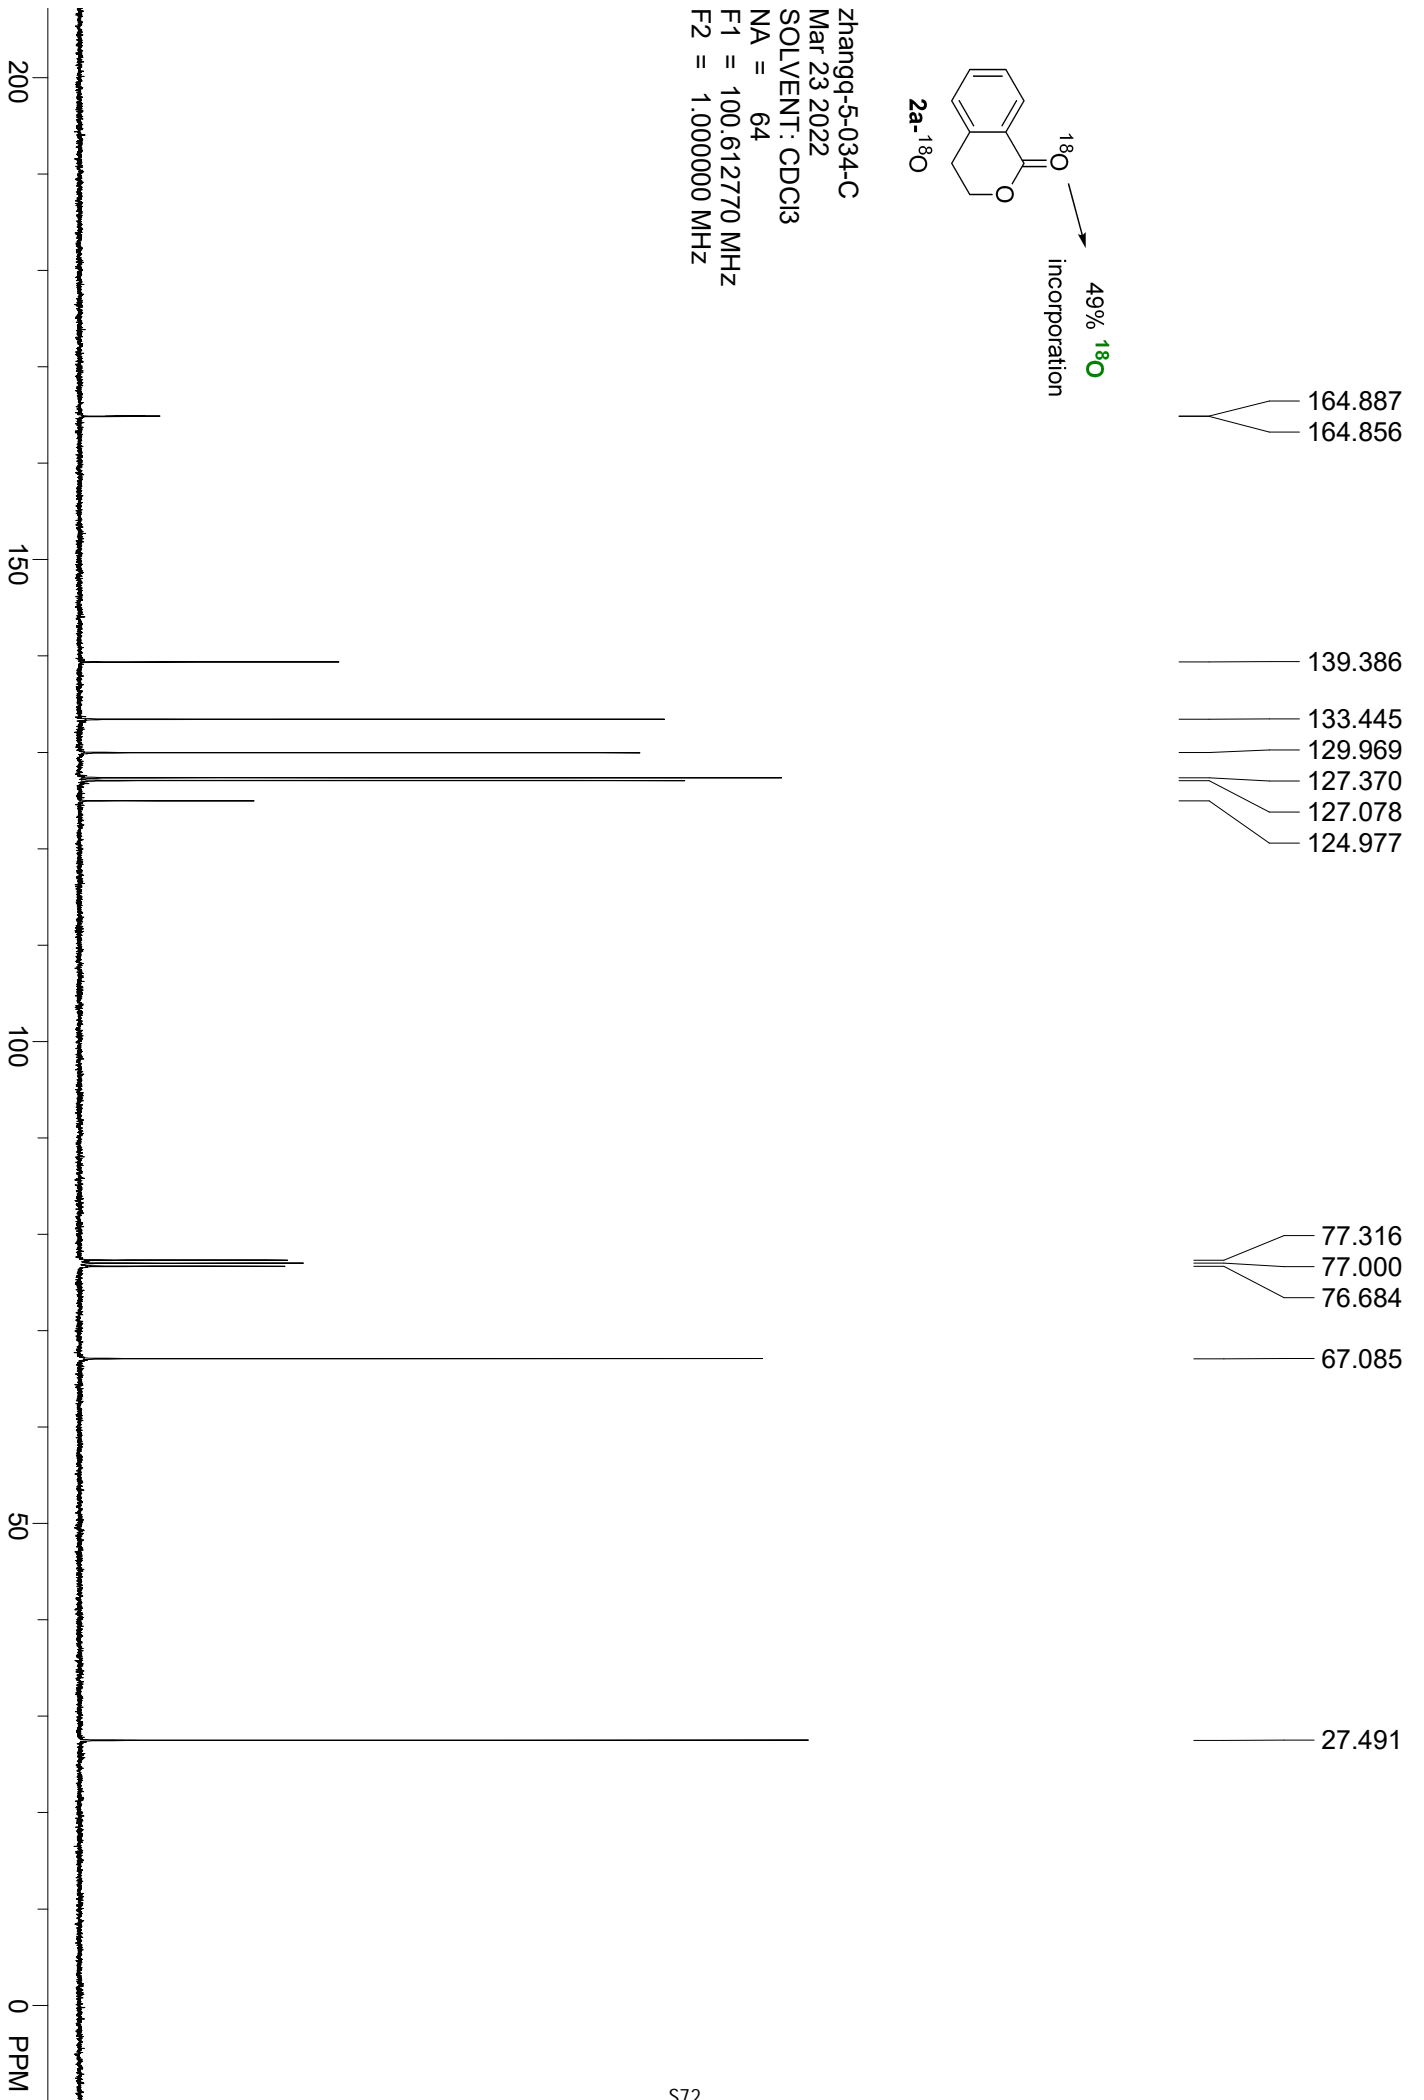

Supplement: d2qo01800d1.pdf [file d2qo01800d1.pdf]
